# Supplementary material for: Enantioselective palladium-catalyzed arylation of N-tosylarylimines with arylboronic acids using a chiral 2,2′-bipyridine ligand
Source: Royal Society of Chemistry journal article supplement (doi:10.1039/c5ob02330k), 2015-11-24

## Supporting Information

### Enantioselective palladium-catalyzed arylation of *N*-tosylarylimines with arylboronic acids using a chiral 2,2'-bipyridine ligand

*Email: ygzhou@dicp.ac.cn*

#### Table of Contents

|                                                                                                     |    |
|-----------------------------------------------------------------------------------------------------|----|
| 1. General.....                                                                                     | S1 |
| 2. General Procedure for Synthesis of <i>N</i> -Tosylarylimines.....                                | S1 |
| 3. Palladium-Catalyzed Asymmetric Addition of Arylboronic Acids to<br><i>N</i> -Tosylarylimine..... | S2 |
| 4. References.....                                                                                  | S8 |
| 5. Copy of NMR and HPLC for Racemic and Chiral Compounds.....                                       | S9 |

**1. General:** Commercially available reagents were used without further purification. Solvents were treated prior to use according to the standard methods.  $^1\text{H}$  NMR and  $^{13}\text{C}$  NMR spectra were recorded at room temperature in  $\text{CDCl}_3$  or  $\text{DMSO}-d_6$  on 400 MHz instrument with TMS (tetramethylsilane) as internal standard. Enantiomeric excess was determined by HPLC analysis, using chiral column described below in detail. Optical rotations were measured by polarimeter. Flash column chromatography was performed on silica gel (200-300 mesh).

## 2. General Procedure for Synthesis of *N*-Tosylarylimines **1**

*N*-Tosylarylimines **1** can be conveniently synthesized according to the known literature procedures.<sup>[1]</sup> **1a-1l** are the known compounds<sup>[2,3,4]</sup> except (*E*)-*N*-(3,5-dimethoxybenzylidene)-4-methylbenzenesulfonamide (**1i**) and (*E*)-*N*-(2-bromo-4,5-dimethoxybenzylidene)-4-methylbenzenesulfonamide (**1k**).

### Synthesis of (*E*)-*N*-(3,5-Dimethoxybenzylidene)-4-methylbenzenesulfonamide (**1i**)

Following a known literature report,<sup>[1]</sup> the aldehyde (0.848 g, 5.1 mmol), *p*-toluenesulfonamides (0.856 g, 5.0 mmol) and  $\text{Si}(\text{OEt})_4$  (1.20 mL, 5.4 mmol) were combined in a flask equipped with a still head and heated at 160 °C under nitrogen for 5 h, during which time ethanol was collected in a receiving flask. On cooling, the reaction mixture was dissolved in warm ethyl acetate (50 mL) and treated with petroleum ether (60-90 °C, 100 mL), and allowed to stand at room temperature for 1 hour. During this time crystals formed, which were collected by filtration, washed with petroleum ether and dried to afford *N*-tosylarylimine **1i**.

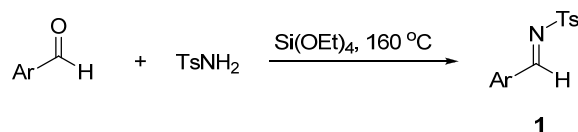

**(*E*)-*N*-(3,5-Dimethoxybenzylidene)-4-methylbenzenesulfonamide (**1i**):** Yellow solid, m.p. = 132-133 °C, unknown compound, Yield: 53%.  $^1\text{H}$  NMR (400 MHz,  $\text{CDCl}_3$ )  $\delta$  8.92 (s, 1H), 7.88 (d,  $J = 8.3$  Hz, 2H), 7.35 (d,  $J = 8.3$  Hz, 2H), 7.05 (d,  $J = 2.3$  Hz, 2H), 6.68 (t,  $J = 2.3$  Hz, 1H), 3.81 (s, 6H), 2.44 (s, 3H).  $^{13}\text{C}$  NMR (100 MHz,  $\text{CDCl}_3$ )  $\delta$  170.4, 161.4, 144.9, 135.3, 134.4, 130.0, 128.4, 108.9, 108.0, 55.9, 21.9. HRMS Calculated for  $\text{C}_{16}\text{H}_{18}\text{NO}_4\text{S}$  ( $\text{M}+\text{H}$ )<sup>+</sup> 320.0951, found: 320.0948.

**(*E*)-*N*-(2-Bromo-4,5-dimethoxybenzylidene)-4-methylbenzenesulfonamide (**1k**):** White solid, m.p. = 176-177 °C, unknown compound, yield: 57%.  $^1\text{H}$  NMR (400 MHz,  $\text{CDCl}_3$ )  $\delta$  9.28 (s, 1H), 7.89 (d,  $J = 8.2$  Hz, 2H), 7.59 (s, 1H), 7.35 (d,  $J = 8.1$  Hz, 2H), 7.06 (s, 1H), 3.94 (s, 3H), 3.88 (s, 3H), 2.44 (s, 3H).  $^{13}\text{C}$  NMR (100 MHz,  $\text{CDCl}_3$ )  $\delta$  169.0, 155.4, 149.0, 144.7, 135.3, 130.0, 128.4, 123.7, 122.9, 115.7, 111.3, 56.7, 56.5, 21.8. HRMS Calculated for  $\text{C}_{16}\text{H}_{17}\text{BrNO}_4\text{S}$  ( $\text{M}+\text{H}$ )<sup>+</sup> 398.0056, found: 398.0051.

### 3. Palladium-catalyzed Asymmetric Addition of Arylboronic Acids to *N*-Tosylarylimines

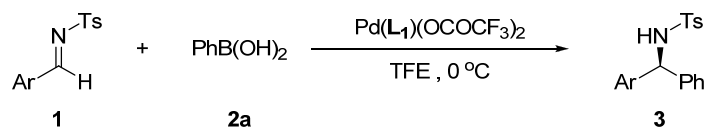

**General Procedure:** Pd(*(R<sub>a</sub>,S,S)*-C3-ACBP **L**<sub>1</sub>)(OCOCF<sub>3</sub>)<sub>2</sub> (5.9 mg, 0.01 mmol, 5 mol%) in trifluoroethanol (TFE, 3 mL) was stirred at 0 °C for 10 minutes, arylboronic acids and *N*-tosylarylimines were added sequentially to the solution. The mixture was kept stirring until the reaction completed indicated by TLC. Then the resulting mixture was concentrated under vacuum and purified by silica gel chromatography using petroleum ether/ethyl acetate as eluent, the enantiomeric excess of the products were determined by HPLC with chiral columns.

**(*S*)-*N*-((4-Chlorophenyl)(phenyl)methyl)-4-methylbenzenesulfonamide (**3aa**):** White solid, known compound,<sup>[2]</sup> m.p. = 120-121 °C, yield: 99%, ee: 89%, [α]<sub>D</sub><sup>20</sup> = -4.91 (*c* 1.10, CHCl<sub>3</sub>) [lit.<sup>[2]</sup>: [α]<sub>D</sub><sup>20</sup> = -3.4 (*c* 0.91, CHCl<sub>3</sub>) for 90% ee], R<sub>f</sub> = 0.45 (petroleum ether/diethyl ether 1:1). <sup>1</sup>H NMR (400 MHz, CDCl<sub>3</sub>) δ 7.54 (d, *J* = 8.3 Hz, 2H), 7.23-7.10 (m, 7H), 7.09-6.99 (m, 4H), 5.53 (d, *J* = 7.3 Hz, 1H), 5.32 (d, *J* = 7.2 Hz, 1H), 2.38 (s, 3H). <sup>13</sup>C NMR (100 MHz, CDCl<sub>3</sub>) δ 143.6, 140.3, 139.3, 137.5, 133.6, 129.6, 129.0, 128.9, 128.8, 128.0, 127.5, 127.4, 61.0, 21.7. HPLC (OD-H column, <sup>i</sup>PrOH/hexane 30/70, 0.70 mL/min, 230 nm): t<sub>1</sub> = 8.2 min (major), t<sub>2</sub> = 10.2 min.

**(*S*)-*N*-((4-Bromophenyl)(phenyl)methyl)-4-methylbenzenesulfonamide (**3ba**):** White solid, known compound,<sup>[3]</sup> m.p. = 133-134 °C, yield: 96%, ee: 89%, [α]<sub>D</sub><sup>20</sup> = -6.60 (*c* 1.00, CHCl<sub>3</sub>) [lit.<sup>[3]</sup>: [α]<sub>D</sub><sup>20</sup> = -8.9 (*c* 0.94, CHCl<sub>3</sub>) for 95% ee], R<sub>f</sub> = 0.45 (petroleum ether/diethyl ether 1:1). <sup>1</sup>H NMR (400 MHz, CDCl<sub>3</sub>) δ 7.53 (d, *J* = 8.1 Hz, 2H), 7.30 (d, *J* = 8.3 Hz, 2H), 7.24-6.91 (m, 9H), 5.51 (d, *J* = 7.1 Hz, 1H), 5.40 (brs, 1H), 2.38 (s, 3H). <sup>13</sup>C NMR (100 MHz, CDCl<sub>3</sub>) δ 143.6, 140.2, 139.8, 137.4, 131.8, 129.6, 129.3, 128.9, 128.0, 127.5, 127.4, 121.8, 61.0, 21.7. HPLC (OD-H column, <sup>i</sup>PrOH/hexane 20/80, 0.70 mL/min, 230 nm): t<sub>1</sub> = 11.3 min (major), t<sub>2</sub> = 15.1 min.

**(*S*)-*N*-((2-Bromophenyl)(phenyl)methyl)-4-methylbenzenesulfonamide (**3ca**):** White solid, known compound,<sup>[2]</sup> m.p. = 174-175 °C, yield: 90%, ee: 90%, [α]<sub>D</sub><sup>20</sup> = +23.00 (*c* 0.30, CHCl<sub>3</sub>) [lit.<sup>[2]</sup>: [α]<sub>D</sub><sup>20</sup> = +14.5 (*c* 0.765, CHCl<sub>3</sub>) for 84% ee], R<sub>f</sub> = 0.40 (petroleum ether/diethyl ether 1:1). <sup>1</sup>H NMR (400 MHz, CDCl<sub>3</sub>) δ 7.61 (d, *J* = 8.3 Hz, 2H), 7.41 (dd, *J* = 8.0, 1.1 Hz, 1H), 7.35 (dd, *J* = 7.8, 1.6 Hz, 1H), 7.24-6.98 (m, 9H), 5.93 (d, *J* = 7.3 Hz, 1H), 5.62 (d, *J* = 7.3 Hz, 1H), 2.35 (s, 3H). <sup>13</sup>C NMR (100 MHz, CDCl<sub>3</sub>): δ 143.6, 139.5, 139.3, 137.2, 133.4, 129.8, 129.7, 129.3, 128.9, 128.1, 127.8, 127.7, 127.5, 123.3, 60.8, 21.7. HPLC (AD-H column, <sup>i</sup>PrOH/hexane 10/90, 0.7 mL/min, 230 nm): t<sub>1</sub> = 26.4 min (major), t<sub>2</sub> = 28.8 min.

**(*S*)-4-Methyl-*N*-((phenyl(*p*-tolyl)methyl)benzenesulfonamide (**3da**):** White solid, known compound,<sup>[2]</sup> m.p. = 150-151 °C, yield: 91%, ee: 90%, [α]<sub>D</sub><sup>20</sup> = -10.00 (*c* 1.00, CHCl<sub>3</sub>) [lit.<sup>[2]</sup>:

[α]<sub>D</sub><sup>20</sup> = -9.1 (*c* 0.91, CHCl<sub>3</sub>) for 90% ee], R<sub>f</sub> = 0.50 (petroleum ether/diethyl ether 1:1). <sup>1</sup>H NMR (400 MHz, CDCl<sub>3</sub>) δ 7.55 (d, *J* = 8.2 Hz, 2H), 7.22-7.05 (m, 7H), 6.98 (q, *J* = 8.3 Hz, 4H), 5.52 (d, *J* = 7.2 Hz, 1H), 5.30 (brs, 1H), 2.36 (s,

3H), 2.26 (s, 3H).  $^{13}\text{C}$  NMR (100 MHz,  $\text{CDCl}_3$ ):  $\delta$  143.3, 140.9, 137.9, 137.7, 137.5, 129.5, 129.4, 128.7, 127.6, 127.5, 127.5, 127.4, 61.3, 21.6, 21.2. HPLC (OD-H column,  $^i\text{PrOH}$ /hexane 20/80, 0.70 mL/min, 230 nm):  $t_1 = 9.6$  min (major),  $t_2 = 12.8$  min.

**(S)-N-((4-Methoxyphenyl)(phenyl)methyl)-4-methylbenzenesulfonamide (3ea):** White solid, known compound,<sup>[2]</sup> m.p. = 114-115 °C, yield: 99%, ee: 91%,  $[\alpha]_{\text{D}}^{20} = -17.5$  ( $c$  1.00,  $\text{CHCl}_3$ ) [lit.<sup>[2]</sup>:  $[\alpha]_{\text{D}}^{20} = -11.8$  ( $c$  0.75,  $\text{CHCl}_3$ ) for 88% ee],  $R_f = 0.30$  (petroleum ether/diethyl ether 1:1).  $^1\text{H}$  NMR (400 MHz,  $\text{CDCl}_3$ )  $\delta$  7.56 (d,  $J = 8.3$  Hz, 2H), 7.25-7.06 (m, 7H), 7.04-6.96 (m, 2H), 6.79-6.66 (m, 2H), 5.53 (d,  $J = 7.3$  Hz, 1H), 5.39 (brs, 1H), 3.74 (s, 3H), 2.38 (s, 3H).  $^{13}\text{C}$  NMR (100 MHz,  $\text{CDCl}_3$ ):  $\delta$  159.1, 143.2, 141.0, 137.7, 133.0, 129.5, 128.8, 128.6, 127.6, 127.5, 127.4, 114.1, 61.0, 55.4, 21.6. HPLC (OD-H column,  $^i\text{PrOH}$ /hexane 20/80, 0.70 mL/min, 230 nm):  $t_1 = 12.7$  min (major),  $t_2 = 19.0$  min.

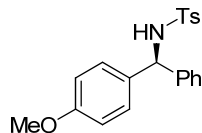

**(-)-N-((2-Hydroxyphenyl)(phenyl)methyl)-4-methylbenzenesulfonamide (3fa):** White solid, unknown compound, m.p. = 154-155 °C, yield: 76%, ee: 91%,  $[\alpha]_{\text{D}}^{20} = -5.67$  ( $c$  0.97,  $\text{CHCl}_3$ ),  $R_f = 0.35$  (petroleum ether/diethyl ether 1:1).  $^1\text{H}$  NMR (400 MHz,  $\text{CDCl}_3$ )  $\delta$  7.53 (d,  $J = 8.2$  Hz, 2H), 7.25-7.12 (m, 5H), 7.10-6.95 (m, 3H), 6.86 (dd,  $J = 7.5$ , 1.2 Hz, 1H), 6.76-6.57 (m, 2H), 6.05 (brs, 1H), 5.94 (d,  $J = 8.9$  Hz, 1H), 5.64 (d,  $J = 8.9$  Hz, 1H), 2.31 (s, 3H).  $^{13}\text{C}$  NMR (100 MHz,  $\text{CDCl}_3$ )  $\delta$  153.3, 143.4, 140.0, 137.1, 129.8, 129.5, 129.3, 128.5, 127.6, 127.3, 127.1, 126.1, 120.9, 116.7, 59.3, 21.6. HRMS Calculated for  $\text{C}_{20}\text{H}_{19}\text{NNaO}_3\text{S}$  ( $\text{M}+\text{Na}$ ) $^+$  376.0978, found: 376.0984. HPLC of the product after being protected by benzoyl chloride (OD-H column,  $^i\text{PrOH}$ /hexane 30/70, 0.70 mL/min, 230 nm):  $t_1 = 10.5$  min,  $t_2 = 12.1$  min (major).

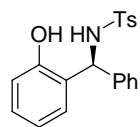

**(S)-N-((2-Methoxyphenyl)(phenyl)methyl)-4-methylbenzenesulfonamide (3ga):** White solid, known compound,<sup>[2]</sup> m.p. = 115-116 °C, yield: 95%, ee: 91%,  $[\alpha]_{\text{D}}^{20} = -24.30$  ( $c$  1.00,  $\text{CHCl}_3$ ) [lit.<sup>[2]</sup>:  $[\alpha]_{\text{D}}^{20} = -23.6$  ( $c$  0.65,  $\text{CHCl}_3$ ) for 92% ee],  $R_f = 0.45$  (petroleum ether/diethyl ether 1:1).  $^1\text{H}$  NMR (400 MHz,  $\text{CDCl}_3$ )  $\delta$  7.51 (d,  $J = 8.2$  Hz, 2H), 7.23-7.09 (m, 6H), 7.07-6.94 (m, 3H), 6.76 (t,  $J = 7.4$  Hz, 1H), 6.66 (d,  $J = 8.2$  Hz, 1H), 5.89 (d,  $J = 9.2$  Hz, 1H), 5.67 (d,  $J = 9.2$  Hz, 1H), 3.57 (s, 3H), 2.30 (s, 3H).  $^{13}\text{C}$  NMR (100 MHz,  $\text{CDCl}_3$ )  $\delta$  156.5, 142.9, 140.8, 137.8, 129.7, 129.2, 129.1, 128.3, 128.0, 127.2, 127.2, 127.0, 120.8, 111.3, 59.1, 55.4, 21.6. HPLC (OD-H column,  $^i\text{PrOH}$ /hexane 20/80, 0.70 mL/min, 230 nm):  $t_1 = 9.8$  min,  $t_2 = 11.1$  min (major).

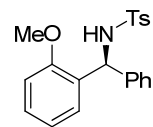

**(-)-N-((3,4-Dimethoxyphenyl)(phenyl)methyl)-4-methylbenzenesulfonamide (3ha):** White solid, unknown compound, m.p. = 146-147 °C, yield: 94%, ee: 92%,  $[\alpha]_{\text{D}}^{20} = -17.00$  ( $c$  1.00,  $\text{CHCl}_3$ ),  $R_f = 0.10$  (petroleum ether/diethyl ether 1:1).  $^1\text{H}$  NMR (400 MHz,  $\text{CDCl}_3$ )  $\delta$  7.55 (d,  $J = 8.2$  Hz, 2H), 7.25-7.06 (m, 7H), 6.73-6.63 (m, 1H), 6.62-6.52 (m, 2H), 5.53 (d,  $J = 7.2$  Hz, 1H), 5.33 (d,  $J = 7.2$  Hz, 1H), 3.81 (s, 3H), 3.69 (s, 3H), 2.36 (s, 3H).  $^{13}\text{C}$  NMR (100 MHz,  $\text{CDCl}_3$ )  $\delta$  149.2, 148.7, 143.3, 140.9, 137.8, 133.3, 129.5, 128.7, 127.7, 127.5, 127.4, 120.0, 111.2, 110.8, 61.3, 56.1, 55.9, 21.6. HRMS Calculated for  $\text{C}_{22}\text{H}_{23}\text{NNaO}_4\text{S}$  ( $\text{M}+\text{Na}$ ) $^+$  420.1240, found: 420.1233. HPLC (IA column,  $^i\text{PrOH}$ /hexane 10/90, 1.0 mL/min, 230 nm):  $t_1 = 27.9$  min (major),  $t_2 = 36.0$  min.

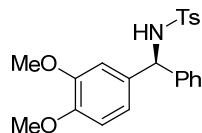

**(-)-N-((3,5-Dimethoxyphenyl)(phenyl)methyl)-4-methylbenzenesulfonamide (3ia):** White solid, unknown compound, m.p. = 139-140 °C, yield: 90%, ee: 90%,  $[\alpha]_{\text{D}}^{20} = -3.40$  ( $c$  1.00,

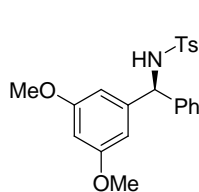

CHCl<sub>3</sub>), R<sub>f</sub> = 0.30 (petroleum ether/diethyl ether 1:1). <sup>1</sup>H NMR (400 MHz, CDCl<sub>3</sub>) δ 7.57 (d, *J* = 8.2 Hz, 2H), 7.25-7.05 (m, 7H), 6.30-6.20 (m, 3H), 5.55 (d, *J* = 7.5 Hz, 1H), 5.49 (d, *J* = 7.5 Hz, 1H), 3.65 (s, 6H), 2.36 (s, 3H). <sup>13</sup>C NMR (100 MHz, CDCl<sub>3</sub>) δ 161.0, 143.3, 143.0, 140.5, 137.6, 129.5, 128.7, 127.7, 127.5, 127.4, 105.6, 99.7, 61.6, 55.4, 21.6. HRMS Calculated for C<sub>22</sub>H<sub>24</sub>NO<sub>4</sub>S (M+H)<sup>+</sup> 398.1421, found: 398.1421. HPLC (OD-H column, <sup>i</sup>PrOH/hexane 20/80, 0.7 mL/min, 230 nm): t<sub>1</sub> = 11.9 min, t<sub>2</sub> = 14.5 min (major).

**(-)-4-Methyl-N-(phenyl(3,4,5-trimethoxyphenyl)methyl)benzenesulfonamide (3ja):**

White solid, unknown compound, m.p. = 100-101 °C, yield: 99%, ee: 92%, [α]<sup>20</sup><sub>D</sub> = -14.50 (*c* 0.80,

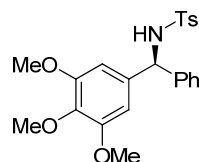

CHCl<sub>3</sub>), R<sub>f</sub> = 0.20 (petroleum ether/diethyl ether 1:1). <sup>1</sup>H NMR (400 MHz, CDCl<sub>3</sub>) δ 7.55 (d, *J* = 8.3 Hz, 2H), 7.24-7.05 (m, 7H), 5.75 (d, *J* = 7.7 Hz, 1H), 5.51 (d, *J* = 7.7 Hz, 1H), 3.76 (s, 3H), 3.65 (s, 6H), 2.35 (s, 3H). <sup>13</sup>C NMR (100 MHz, CDCl<sub>3</sub>) δ 153.3, 143.3, 140.7, 137.7, 137.4, 136.1, 129.4, 128.7, 127.8, 127.4, 127.4, 104.7, 61.7, 60.9, 56.1, 21.6. HRMS Calculated for C<sub>23</sub>H<sub>25</sub>NNaO<sub>5</sub>S (M+Na)<sup>+</sup> 450.1346, found: 450.1335. HPLC (OD-H column, <sup>i</sup>PrOH/hexane 20/80, 0.70 mL/min, 230 nm): t<sub>1</sub> = 14.2 min, t<sub>2</sub> = 16.4 min (major).

**(-)-N-((2-Bromo-4,5-dimethoxyphenyl)(phenyl)methyl)-4-methylbenzenesulfonamide**

**(3ka):** White solid, unknown compound, m.p. = 142-143 °C, yield: 99%, ee: 93%, [α]<sup>20</sup><sub>D</sub> = -1.87

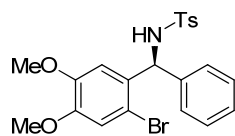

(*c* 1.07, CHCl<sub>3</sub>), R<sub>f</sub> = 0.15 (petroleum ether/diethyl ether 1:1). <sup>1</sup>H NMR (400 MHz, CDCl<sub>3</sub>) δ 7.60 (d, *J* = 8.3 Hz, 2H), 7.25-7.18 (m, 3H), 7.15-7.08 (m, 4H), 6.86 (s, 1H), 6.75 (s, 1H), 5.88 (d, *J* = 7.1 Hz, 1H), 5.58 (d, *J* = 7.1 Hz, 1H), 3.82 (s, 3H), 3.71 (s, 3H), 2.37 (s, 3H). <sup>13</sup>C NMR (100 MHz, CDCl<sub>3</sub>) δ 149.2, 148.8, 143.6, 139.8, 137.3, 131.2, 129.6, 128.9, 128.0, 127.5, 127.4, 115.8, 113.3, 112.1, 60.6, 56.4, 56.2, 21.7. HRMS Calculated for C<sub>22</sub>H<sub>22</sub>BrNNaO<sub>4</sub>S (M+Na)<sup>+</sup> 498.0345, found: 498.0344. HPLC (OD-H column, <sup>i</sup>PrOH/hexane 20/80, 0.70 mL/min, 230 nm): t<sub>1</sub> = 12.2 min, t<sub>2</sub> = 16.6 min (major).

**(S)-4-Methyl-N-(naphthalen-1-yl(phenyl)methyl)benzenesulfonamide (3la):** White solid, known compound,<sup>[31]</sup> m.p. = 80-82 °C, yield: 99%, ee: 90%. [α]<sup>20</sup><sub>D</sub> = -9.70 (*c* 1.00, CHCl<sub>3</sub>) [lit.<sup>[31]</sup>:

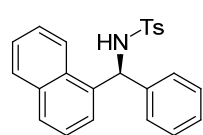

[α]<sup>20</sup><sub>D</sub> = -8.7 (*c* 0.85, CHCl<sub>3</sub>) for 95% ee]. R<sub>f</sub> = 0.15 (petroleum ether/diethyl ether 1:1). <sup>1</sup>H NMR (400 MHz, CDCl<sub>3</sub>) δ 7.92-7.78 (m, 2H), 7.76-7.66 (m, 1H), 7.54-7.36 (m, 4H), 7.32-7.25 (m, 2H), 7.24-7.11 (m, 5H), 7.02 (d, *J* = 8.1 Hz, 2H), 6.35 (d, *J* = 7.4 Hz, 1H), 5.52 (d, *J* = 7.4 Hz, 1H), 2.34 (s, 3H). <sup>13</sup>C NMR (100 MHz, CDCl<sub>3</sub>) δ 143.2, 140.4, 137.5, 135.7, 134.1, 130.7, 129.4, 129.0, 128.7, 128.7, 127.7, 127.7, 127.3, 126.7, 126.3, 125.9, 125.2, 123.6, 58.6, 21.6. HPLC (OD-H column, <sup>i</sup>PrOH/hexane 20/80, 0.70 mL/min, 230 nm): t<sub>1</sub> = 17.2 min, t<sub>2</sub> = 20.3 min (major).

**(+)-N-((2-Bromo-4,5-dimethoxyphenyl)(p-tolyl)methyl)-4-methylbenzenesulfonamide**

**(3kb):** White solid, unknown compound, m.p. = 158-159 °C, yield: 98%, ee: 93%, [α]<sup>20</sup><sub>D</sub> = +9.29

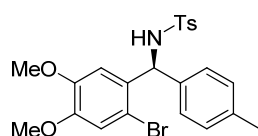

(*c* 0.93, CHCl<sub>3</sub>), R<sub>f</sub> = 0.15 (petroleum ether/diethyl ether 1:1). <sup>1</sup>H NMR (400 MHz, CDCl<sub>3</sub>) δ 7.60 (d, *J* = 8.2 Hz, 2H), 7.14 (d, *J* = 8.1 Hz, 2H), 7.01 (q, *J* = 8.3 Hz, 4H), 6.85 (s, 1H), 6.78 (s, 1H), 5.84 (d, *J* = 7.0 Hz, 1H), 5.58 (d, *J* = 7.0 Hz, 1H), 3.81 (s, 3H), 3.71 (s, 3H), 2.37 (s, 3H), 2.27 (s, 3H). <sup>13</sup>C NMR (100 MHz, CDCl<sub>3</sub>) δ 149.1, 148.8, 143.5, 137.7, 137.3, 136.9, 131.4, 129.5,

129.5, 127.5, 127.4, 115.7, 113.2, 112.0, 60.3, 56.4, 56.1, 21.6, 21.2. HRMS Calculated for  $C_{23}H_{24}BrNNaO_4S$  ( $M+Na$ )<sup>+</sup> 512.0502, found: 512.0489. HPLC (OD-H column, <sup>i</sup>PrOH/hexane 20/80, 0.70 mL/min, 230 nm):  $t_1 = 10.9$  min,  $t_2 = 19.7$  min (major).

**(+)-*N*-((2-Bromo-4,5-dimethoxyphenyl)(*m*-tolyl)methyl)-4-methylbenzenesulfonamide**

**(3kc):** Colorless oil, unknown compound, yield: 99%, ee: 93%,  $[\alpha]_D^{20} = +3.96$  (*c* 0.96,  $CHCl_3$ ),  $R_f = 0.15$  (petroleum ether/diethyl ether 1:1). <sup>1</sup>H NMR (400 MHz,  $CDCl_3$ )  $\delta$  7.60 (d, *J* = 8.2 Hz, 2H), 7.18-7.05 (m, 3H), 7.01 (d, *J* = 7.6 Hz, 1H), 6.94-6.82 (m, 3H), 6.76 (s, 1H), 5.85 (d, *J* = 7.1 Hz, 1H), 5.60 (brs, 1H), 3.81 (s, 3H), 3.71 (s, 3H), 2.37 (s, 3H), 2.23 (s, 3H). <sup>13</sup>C NMR (100 MHz,  $CDCl_3$ )  $\delta$  149.1, 148.7, 143.5, 139.8, 138.5, 137.3, 131.4, 129.5, 128.7, 128.1, 127.5, 124.4, 115.7, 113.3, 112.1, 60.5, 56.4, 56.2, 21.6, 21.6. HRMS Calculated for  $C_{23}H_{24}BrNNaO_4S$  ( $M+Na$ )<sup>+</sup> 512.0502, found: 512.0495. HPLC (OD-H column, <sup>i</sup>PrOH/hexane 10/90, 1.0 mL/min, 230 nm):  $t_1 = 15.9$  min,  $t_2 = 19.9$  min (major).

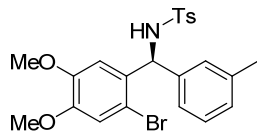

**(+)-*N*-((2-Bromo-4,5-dimethoxyphenyl)(*o*-tolyl)methyl)-4-methylbenzenesulfonamide**

**(3kd):** Colorless oil, unknown compound, yield: 97%, ee: 94%,  $[\alpha]_D^{20} = +39.44$  (*c* 0.90,  $CHCl_3$ ),  $R_f = 0.15$  (petroleum ether/diethyl ether 1:1). <sup>1</sup>H NMR (400 MHz,  $CDCl_3$ )  $\delta$  7.55 (d, *J* = 7.6 Hz, 2H), 7.18-7.08 (m, 4H), 7.04-6.96 (m, 1H), 6.94-6.81 (m, 2H), 6.73 (s, 1H), 6.06 (d, *J* = 6.1 Hz, 1H), 5.06 (brs, 1H), 3.82 (s, 3H), 3.61 (s, 3H), 2.36 (s, 3H), 2.32 (s, 3H). <sup>13</sup>C NMR (100 MHz,  $CDCl_3$ )  $\delta$  149.0, 148.4, 143.6, 137.6, 137.6, 137.0, 131.1, 130.8, 129.5, 128.2, 127.6, 127.4, 126.3, 115.8, 113.5, 112.4, 57.8, 56.4, 56.0, 21.6, 19.3. HRMS Calculated for  $C_{23}H_{24}BrNNaO_4S$  ( $M+Na$ )<sup>+</sup> 512.0502, found: 512.0498. HPLC (IA column, <sup>i</sup>PrOH/hexane 15/85, 1.0 mL/min, 230 nm):  $t_1 = 15.5$  min (major),  $t_2 = 22.6$  min.

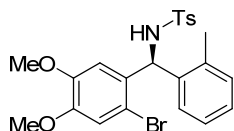

**(+)-*N*-((2-Bromo-4,5-dimethoxyphenyl)(4-methoxyphenyl)methyl)-4-methylbenzenesulfonamide (3ke):** White solid, unknown compound, m.p. = 148-149 °C, yield: 98%, ee: 92%,  $[\alpha]_D^{20} = +13.02$  (*c* 0.96,  $CHCl_3$ ),  $R_f = 0.10$  (petroleum ether/diethyl ether 1:1). <sup>1</sup>H NMR (400 MHz,  $CDCl_3$ )  $\delta$  7.59 (d, *J* = 8.3 Hz, 2H), 7.13 (d, *J* = 8.1 Hz, 2H), 7.02 (d, *J* = 8.7 Hz, 2H), 6.85 (s, 1H), 6.81-6.69 (m, 3H), 5.82 (d, *J* = 7.1 Hz, 1H), 5.62 (d, *J* = 7.1 Hz, 1H), 3.81 (s, 3H), 3.74 (s, 3H), 3.71 (s, 3H), 2.36 (s, 3H). <sup>13</sup>C NMR (100 MHz,  $CDCl_3$ )  $\delta$  159.3, 149.0, 148.7, 143.5, 137.3, 131.9, 131.5, 129.5, 128.7, 127.4, 115.7, 114.2, 113.2, 111.9, 60.1, 56.4, 56.1, 55.4, 21.6. HRMS Calculated for  $C_{23}H_{24}BrNNaO_5S$  ( $M+Na$ )<sup>+</sup> 528.0451, found: 528.0443. HPLC (OD-H column, <sup>i</sup>PrOH/hexane 30/70, 0.70 mL/min, 230 nm):  $t_1 = 10.9$  min,  $t_2 = 22.2$  min (major).

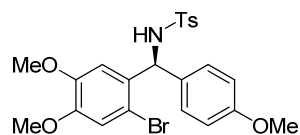

**(+)-*N*-((2-Bromo-4,5-dimethoxyphenyl)(3-methoxyphenyl)methyl)-4-methylbenzenesulfonamide (3kf):** Colorless oil, unknown compound, yield: 99%, ee: 93%,  $[\alpha]_D^{20} = +2.40$  (*c* 0.96,  $CHCl_3$ ),  $R_f = 0.10$  (petroleum ether/diethyl ether 1:1). <sup>1</sup>H NMR (400 MHz,  $CDCl_3$ )  $\delta$  7.60 (d, *J* = 8.3 Hz, 2H), 7.17-7.07 (m, 3H), 6.84 (s, 1H), 6.81-6.66 (m, 4H), 5.94 (d, *J* = 7.6 Hz, 1H), 5.87 (d, *J* = 7.6 Hz, 1H), 3.80 (s, 3H), 3.68 (s, 3H), 3.67 (s, 3H), 2.35 (s, 3H). <sup>13</sup>C NMR (100 MHz,  $CDCl_3$ )  $\delta$  159.9, 149.1, 148.8, 143.5, 141.4, 137.2, 131.4, 129.8, 129.5, 127.4, 119.6, 115.6, 113.3, 113.2, 113.1, 111.8, 60.3, 56.3, 56.1, 55.3, 21.6. HRMS Calculated for

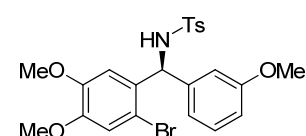

$C_{23}H_{24}BrNNaO_5S$  ( $M+Na$ )<sup>+</sup> 528.0451, found: 528.0445. HPLC (OD-H column, *i*PrOH/hexane 10/90, 0.70 mL/min, 230 nm):  $t_1 = 23.3$  min,  $t_2 = 30.1$  min (major).

**(+)-*N*-((2-Bromo-4,5-dimethoxyphenyl)(2-methoxyphenyl)methyl)-4-methylbenzenesulfonamide (3kg)**: White solid, unknown compound, m.p. = 94-95 °C, yield: 99%, ee: 94%,  $[\alpha]_D^{20} = +2.72$  (*c* 0.92,  $CHCl_3$ ),  $R_f = 0.10$  (petroleum ether/diethyl ether 1:1). <sup>1</sup>H NMR (400 MHz,  $CDCl_3$ )  $\delta$  7.63 (d,  $J = 8.3$  Hz, 2H), 7.22-7.10 (m, 3H), 7.09-7.00 (m, 2H), 6.89 (s, 1H), 6.82-6.68 (m, 2H), 6.01 (d,  $J = 6.6$  Hz, 1H), 5.64 (d,  $J = 6.5$  Hz, 1H), 3.81 (s, 3H), 3.74 (s, 3H), 3.63 (s, 3H), 2.36 (s, 3H). <sup>13</sup>C NMR (100 MHz,  $CDCl_3$ )  $\delta$  156.7, 148.9, 148.3, 143.2, 137.4, 131.5, 129.5, 129.4, 129.3, 127.6, 127.5, 120.7, 115.6, 113.3, 112.6, 111.0, 57.3, 56.3, 56.1, 55.3, 21.6. HRMS Calculated for  $C_{23}H_{24}BrNNaO_5S$  ( $M+Na$ )<sup>+</sup> 528.0451, found: 528.0458. HPLC (OD-H column, *i*PrOH/hexane 30/70, 0.70 mL/min, 230 nm):  $t_1 = 10.3$  min (major),  $t_2 = 12.2$  min.

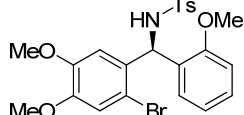

**(+)-*N*-((2-Bromo-4,5-dimethoxyphenyl)(4-fluorophenyl)methyl)-4-methylbenzenesulfonamide (3kh)**: White solid, unknown compound, m.p. = 197-198 °C, yield: 99%, ee: 94%,  $[\alpha]_D^{20} = +0.36$  (*c* 0.84,  $CHCl_3$ ),  $R_f = 0.15$  (petroleum ether/diethyl ether 1:1). <sup>1</sup>H NMR (400 MHz,  $DMSO-d_6$ )  $\delta$  8.70 (d,  $J = 9.8$  Hz, 1H), 7.44 (d,  $J = 8.2$  Hz, 2H), 7.27-7.04 (m, 6H), 6.94 (d,  $J = 2.2$  Hz, 2H), 5.82 (d,  $J = 9.7$  Hz, 1H), 3.71 (s, 3H), 3.59 (s, 3H), 2.26 (s, 3H). <sup>13</sup>C NMR (100 MHz,  $DMSO-d_6$ )  $\delta$  162.3 (d,  $J = 243$  Hz), 148.6 (d,  $J = 16$  Hz), 142.3, 138.0, 136.6 (d,  $J = 3$  Hz), 130.9, 129.2 (d,  $J = 8$  Hz), 129.0, 126.3, 115.3, 115.1, 115.0, 112.5, 111.6, 58.8, 56.0, 55.6, 20.8. <sup>19</sup>F NMR (376 MHz,  $CDCl_3$ )  $\delta$  -110.49. HRMS Calculated for  $C_{22}H_{21}BrFNNaO_4S$  ( $M+Na$ )<sup>+</sup> 516.0251, found: 516.0256. HPLC (OD-H column, *i*PrOH/hexane 30/70, 0.70 mL/min, 230 nm):  $t_1 = 8.4$  min,  $t_2 = 15.0$  min (major).

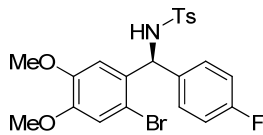

**(+)-*N*-((2-Bromo-4,5-dimethoxyphenyl)(4-bromophenyl)methyl)-4-methylbenzenesulfonamide (3ki)**: White solid, unknown compound, m.p. = 163-164 °C, yield: 95%, ee: 93%,  $[\alpha]_D^{20} = +5.00$  (*c* 1.20,  $CHCl_3$ ),  $R_f = 0.20$  (petroleum ether/diethyl ether 1:1). <sup>1</sup>H NMR (400 MHz,  $CDCl_3$ )  $\delta$  7.56 (d,  $J = 8.2$  Hz, 2H), 7.33 (d,  $J = 8.5$  Hz, 2H), 7.11 (d,  $J = 8.1$  Hz, 2H), 7.03 (d,  $J = 8.5$  Hz, 2H), 6.84 (s, 1H), 6.69 (s, 1H), 6.01 (d,  $J = 8.0$  Hz, 1H), 5.84 (d,  $J = 8.0$  Hz, 1H), 3.81 (s, 3H), 3.69 (s, 3H), 2.36 (s, 3H). <sup>13</sup>C NMR (100 MHz,  $CDCl_3$ )  $\delta$  149.3, 148.9, 143.7, 139.0, 137.1, 131.9, 130.7, 129.6, 129.1, 127.3, 122.0, 115.7, 113.2, 111.7, 60.0, 56.4, 56.2, 21.6. HRMS Calculated for  $C_{22}H_{21}Br_2NNaO_4S$  ( $M+Na$ )<sup>+</sup> 575.9450, found: 575.9444. HPLC (OD-H column, *i*PrOH/hexane 30/70, 0.70 mL/min, 230 nm):  $t_1 = 9.6$  min,  $t_2 = 21.3$  min (major).

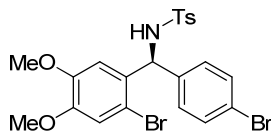

**(+)-*N*-((4-(Benzyloxy)phenyl)(2-bromo-4,5-dimethoxyphenyl)methyl)-4-methylbenzenesulfonamide (3kj)**: White solid, unknown compound, m.p. = 90-91 °C, yield: 99%, ee: 92%,  $[\alpha]_D^{20} = +15.50$  (*c* 1.20,  $CHCl_3$ ),  $R_f = 0.15$  (petroleum ether/diethyl ether 1:1). <sup>1</sup>H NMR (400 MHz,  $CDCl_3$ )  $\delta$  7.59 (d,  $J = 8.2$  Hz, 2H), 7.43-7.27 (m, 5H), 7.13 (d,  $J = 8.1$  Hz, 2H), 7.02 (d,  $J = 8.7$  Hz, 2H), 6.88-6.79 (m, 3H), 6.77 (s, 1H), 5.82 (d,  $J = 6.9$  Hz, 1H), 5.55 (d,  $J = 6.9$  Hz, 1H), 4.99 (s, 2H), 3.81 (s, 3H), 3.70 (s, 3H), 2.36 (s, 3H). <sup>13</sup>C NMR (100 MHz,  $CDCl_3$ )  $\delta$  158.5, 149.1, 148.8, 143.5, 137.3, 137.0, 132.2, 131.4, 129.5, 128.8, 128.8, 128.2, 127.6, 127.5, 115.7, 115.1, 113.2, 111.9, 70.2, 60.1, 56.4, 56.1, 21.6. HRMS Calculated for  $C_{29}H_{28}BrNNaO_5S$

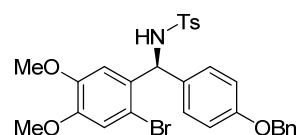

(M+Na)<sup>+</sup> 604.0764, found: 604.0755. HPLC (IA column, <sup>i</sup>PrOH/hexane 20/80, 1.0 mL/min, 230 nm): t<sub>1</sub> = 20.7 min (major), t<sub>2</sub> = 29.9 min.

**(+)-*N*-((2-Bromo-4,5-dimethoxyphenyl)(naphthalen-1-yl)methyl)-4-methylbenzenesulfonamide (3kk)**: White solid, unknown compound, m.p. = 183-184 °C, yield: 99%, ee: 92%, [α]<sup>20</sup><sub>D</sub> = +67.67 (c 1.12, CHCl<sub>3</sub>), R<sub>f</sub> = 0.15 (petroleum ether/diethyl ether 1:1). <sup>1</sup>H NMR (400 MHz, CDCl<sub>3</sub>) δ 8.14-8.04 (m, 1H), 7.89-7.80 (m, 1H), 7.73 (d, *J* = 8.2 Hz, 1H), 7.56-7.43 (m, 4H), 7.25-7.18 (m, 1H), 7.06 (d, *J* = 8.1 Hz, 2H), 7.00 (d, *J* = 7.1 Hz, 1H), 6.92 (s, 1H), 6.78 (s, 1H), 6.68 (d, *J* = 6.2 Hz, 1H), 5.33 (d, *J* = 6.2 Hz, 1H), 3.82 (s, 3H), 3.61 (s, 3H), 2.36 (s, 3H). <sup>13</sup>C NMR (100 MHz, CDCl<sub>3</sub>) δ 149.1, 148.4, 143.6, 137.3, 135.1, 134.2, 131.1, 130.7, 129.5, 129.2, 129.0, 127.5, 127.1, 126.3, 126.2, 125.2, 123.4, 115.8, 113.6, 112.5, 57.4, 56.4, 56.0, 21.6. HRMS Calculated for C<sub>28</sub>H<sub>23</sub>BrNNaO<sub>4</sub>S (M+Na)<sup>+</sup> 548.0502, found: 548.0490. HPLC (OD-H column, <sup>i</sup>PrOH/hexane 30/70, 0.70 mL/min, 230 nm): t<sub>1</sub> = 10.8 min (major), t<sub>2</sub> = 21.2 min.

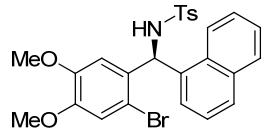

**(*S*)-*N*-((4-Methoxyphenyl)(*p*-tolyl)methyl)-4-methylbenzenesulfonamide (3db)**: White solid, known compound,<sup>[3]</sup> m.p. = 118-119 °C, yield: 87%, ee: 90%, [α]<sup>20</sup><sub>D</sub> = -5.74 (c 0.94, CHCl<sub>3</sub>) [lit.<sup>[3]</sup>: [α]<sup>20</sup><sub>D</sub> = -7.9 (c 0.96, CHCl<sub>3</sub>) for 95% ee], R<sub>f</sub> = 0.35 (petroleum ether/diethyl ether 1:1). <sup>1</sup>H NMR (400 MHz, CDCl<sub>3</sub>) δ 7.55 (d, *J* = 8.3 Hz, 2H), 7.13 (d, *J* = 8.1 Hz, 2H), 7.07-6.91 (m, 6H), 6.78-6.65 (m, 2H), 5.47 (d, *J* = 6.9 Hz, 1H), 5.05 (d, *J* = 6.9 Hz, 1H), 3.74 (s, 3H), 2.38 (s, 3H), 2.27 (s, 3H). <sup>13</sup>C NMR (100 MHz, CDCl<sub>3</sub>) δ 159.2, 143.3, 138.1, 137.7, 137.4, 133.2, 129.5, 129.4, 128.8, 127.5, 127.4, 114.1, 60.8, 55.5, 21.7, 21.2. HPLC (OD-H column, <sup>i</sup>PrOH/hexane 20/80, 0.70 mL/min, 230 nm): t<sub>1</sub> = 15.5 min (major), t<sub>2</sub> = 17.4 min.

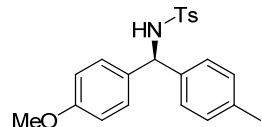

**(*R*)-*N*-((2-Methoxyphenyl)(4-methoxyphenyl)methyl)-4-methylbenzenesulfonamide (3dg)**: White solid, known compound,<sup>[4]</sup> m.p. = 134-135 °C, yield: 77%, ee: 90%, [α]<sup>20</sup><sub>D</sub> = +104.87 (c 0.80, CHCl<sub>3</sub>) [lit.<sup>[4]</sup>: [α]<sup>20</sup><sub>D</sub> = -14.9 (c 1.00, CHCl<sub>3</sub>) for 99% ee (*S*)], R<sub>f</sub> = 0.35 (petroleum ether/diethyl ether 1:1). <sup>1</sup>H NMR (400 MHz, CDCl<sub>3</sub>) δ 7.50 (d, *J* = 8.2 Hz, 2H), 7.21-7.01 (m, 5H), 6.97 (dd, *J* = 7.4, 1.3 Hz, 1H), 6.82-6.70 (m, 3H), 6.67 (d, *J* = 8.2 Hz, 1H), 5.75 (d, *J* = 8.9 Hz, 1H), 5.62 (d, *J* = 8.9 Hz, 1H), 3.74 (s, 3H), 3.60 (s, 3H), 2.32 (s, 3H). <sup>13</sup>C NMR (100 MHz, CDCl<sub>3</sub>) δ 158.9, 156.6, 142.9, 137.8, 133.0, 129.6, 129.2, 129.0, 128.3, 128.1, 127.2, 120.8, 113.7, 111.3, 58.7, 55.5, 55.4, 21.6. HPLC (OD-H column, <sup>i</sup>PrOH/hexane 20/80, 0.70 mL/min, 230 nm): t<sub>1</sub> = 12.4 min (major), t<sub>2</sub> = 19.7 min.

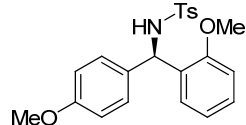

**(-)-*N*-((3,4-Dimethoxyphenyl)(*p*-tolyl)methyl)-4-methylbenzenesulfonamide (3hb)**: Yield: 98%, colorless oil, unknown compound, ee: 90%, [α]<sup>20</sup><sub>D</sub> = -8.02 (c 0.91, CHCl<sub>3</sub>), R<sub>f</sub> = 0.15 (petroleum ether/diethyl ether 1:1). <sup>1</sup>H NMR (400 MHz, CDCl<sub>3</sub>) δ 7.55 (d, *J* = 8.3 Hz, 2H), 7.12 (d, *J* = 8.1 Hz, 2H), 7.07-6.94 (m, 4H), 6.70-6.64 (d, *J* = 8.9 Hz, 1H), 6.62-6.54 (m, 2H), 5.48 (d, *J* = 7.1 Hz, 1H), 5.24 (d, *J* = 7.1 Hz, 1H), 3.81 (s, 3H), 3.69 (s, 3H), 2.37 (s, 3H), 2.28 (s, 3H). <sup>13</sup>C NMR (100 MHz, CDCl<sub>3</sub>) δ 149.1, 148.6, 143.3, 138.0, 137.8, 137.5, 133.5, 129.5, 129.4, 127.4, 127.4, 120.0, 111.2, 110.7, 61.1, 56.1, 55.9, 21.6, 21.2. HRMS Calculated for C<sub>23</sub>H<sub>25</sub>NNaO<sub>4</sub>S (M+Na)<sup>+</sup> 434.1397, found: 434.1392. HPLC (IA column, <sup>i</sup>PrOH/hexane 10/90, 1.0 mL/min, 230 nm): t<sub>1</sub> = 27.4 min (major), t<sub>2</sub> = 34.4 min.

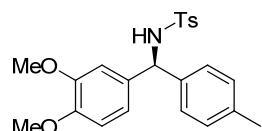



**(+)-*N*-((3,4-Dimethoxyphenyl)(2-methoxyphenyl)methyl)-4-methylbenzenesulfonamide**

**(3hg)**: Colorless oil, unknown compound, yield: 80%, ee: 90%,  $[\alpha]_D^{20} = +6.02$  (*c* 0.93, CHCl<sub>3</sub>),  $R_f = 0.15$  (petroleum ether/diethyl ether 1:1). <sup>1</sup>H NMR (400 MHz, CDCl<sub>3</sub>)  $\delta$  7.52 (d, *J* = 8.2 Hz, 2H), 7.20-7.10 (m, 1H), 7.05 (d, *J* = 8.1 Hz, 2H), 6.99 (dd, *J* = 7.5, 1.6 Hz, 1H), 6.84-6.74 (m, 2H), 6.72-6.62 (m, 2H), 6.58 (dd, *J* = 8.4, 1.8 Hz, 1H), 5.84 (d, *J* = 9.0 Hz, 1H), 5.63 (d, *J* = 9.0 Hz, 1H), 3.80 (s, 3H), 3.74 (s, 3H), 3.62 (s, 3H), 2.32 (s, 3H). <sup>13</sup>C NMR (100 MHz, CDCl<sub>3</sub>)  $\delta$  156.5, 148.9, 148.3, 142.9, 137.8, 133.4, 129.6, 129.2, 129.1, 128.0, 127.2, 120.8, 119.3, 111.2, 110.9, 110.6, 58.8, 56.0, 55.9, 55.4, 21.6. HRMS Calculated for C<sub>23</sub>H<sub>25</sub>NNaO<sub>4</sub>S (M+Na)<sup>+</sup> 450.1346, found: 450.1347. HPLC (IA column, <sup>i</sup>PrOH/hexane 20/80, 1.0 mL/min, 230 nm): *t*<sub>1</sub> = 16.2 min (major), *t*<sub>2</sub> = 20.8 min.

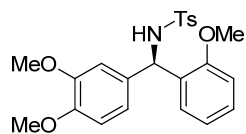

**(+)-4-Methyl-*N*-(*p*-tolyl(3,4,5-trimethoxyphenyl)methyl)benzenesulfonamide (3jb)**

White solid, unknown compound, m.p. = 103-104 °C, yield: 99%, ee: 92%,  $[\alpha]_D^{20} = +1.94$  (*c* 0.98, CHCl<sub>3</sub>),  $R_f = 0.10$  (petroleum ether/diethyl ether 1:1). <sup>1</sup>H NMR (400 MHz, CDCl<sub>3</sub>)  $\delta$  7.55 (d, *J* = 8.3 Hz, 2H), 7.11 (d, *J* = 8.1 Hz, 2H), 7.02 (s, 4H), 6.27 (s, 2H), 5.51 (d, *J* = 7.4 Hz, 1H), 5.47 (d, *J* = 7.4 Hz, 1H), 3.77 (s, 3H), 3.66 (s, 6H), 2.36 (s, 3H), 2.28 (s, 3H). <sup>13</sup>C NMR (100 MHz, CDCl<sub>3</sub>)  $\delta$  153.3, 143.3, 137.8, 137.8, 137.6, 137.4, 136.3, 129.4, 127.4, 127.4, 104.7, 61.5, 60.9, 56.1, 21.6, 21.2. HRMS Calculated for C<sub>24</sub>H<sub>27</sub>NNaO<sub>5</sub>S (M+Na)<sup>+</sup> 464.1502, found: 464.1501. HPLC (OD-H column, <sup>i</sup>PrOH/hexane 20/80, 0.7 mL/min, 230 nm): *t*<sub>1</sub> = 13.6 min, *t*<sub>2</sub> = 21.6 min (major).

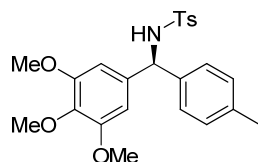

**(+)-*N*-((2-Methoxyphenyl)(3,4,5-trimethoxyphenyl)methyl)-4-methylbenzenesulfonamide (3jg)**: Colorless oil, unknown compound, yield: 99%, ee: 90%,  $[\alpha]_D^{20} = +8.79$  (*c* 0.91, CHCl<sub>3</sub>),

$R_f = 0.10$  (petroleum ether/diethyl ether 1:1). <sup>1</sup>H NMR (400 MHz, CDCl<sub>3</sub>)  $\delta$  7.53 (d, *J* = 8.3 Hz, 2H), 7.20-7.10 (m, 1H), 7.06 (d, *J* = 8.0 Hz, 2H), 7.00 (dd, *J* = 7.5, 1.6 Hz, 1H), 6.85-6.75 (m, 1H), 6.70 (d, *J* = 8.2 Hz, 1H), 6.39 (s, 2H), 5.90 (d, *J* = 8.9 Hz, 1H), 5.64 (d, *J* = 8.9 Hz, 1H), 3.78 (s, 3H), 3.68 (s, 6H), 3.65 (s, 3H), 2.32 (s, 3H). <sup>13</sup>C NMR (100 MHz, CDCl<sub>3</sub>)  $\delta$  156.5, 153.1, 143.0, 137.8, 137.2, 136.4, 129.5, 129.2, 127.9, 127.2, 120.9, 111.2, 104.4, 60.9, 59.0, 56.1, 55.5, 21.6. HRMS Calculated for C<sub>24</sub>H<sub>27</sub>NNaO<sub>6</sub>S (M+Na)<sup>+</sup> 480.1451, found: 480.1442. HPLC (IA column, <sup>i</sup>PrOH/hexane 20/80, 1.0 mL/min, 230 nm): *t*<sub>1</sub> = 15.9 min (major), *t*<sub>2</sub> = 36.0 min.

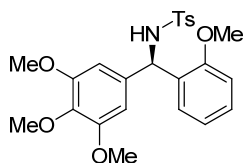

#### 4. References

- 1) Love, B. E.; Raje, P. S.; Walliams II, T. C. *Synlett*, **1994**, 493.
- 2) Ma, G.-N.; Zhang, T.; Shi, M. *Org. Lett.* **2009**, *11*, 875.
- 3) Shao, C.; Yu, H.-J.; Wu, N.-Y.; Feng, C.-G.; Lin, G.-Q. *Org. Lett.* **2010**, *12*, 3820.
- 4) Zhang, Z.-Q.; Feng, C. G.; Xu, M.-H.; Lin, G.-Q. *J. Am. Chem. Soc.* **2007**, *129*, 5336.

## 5. Copy of NMR, HRMS and HPLC for racemic and chiral compounds

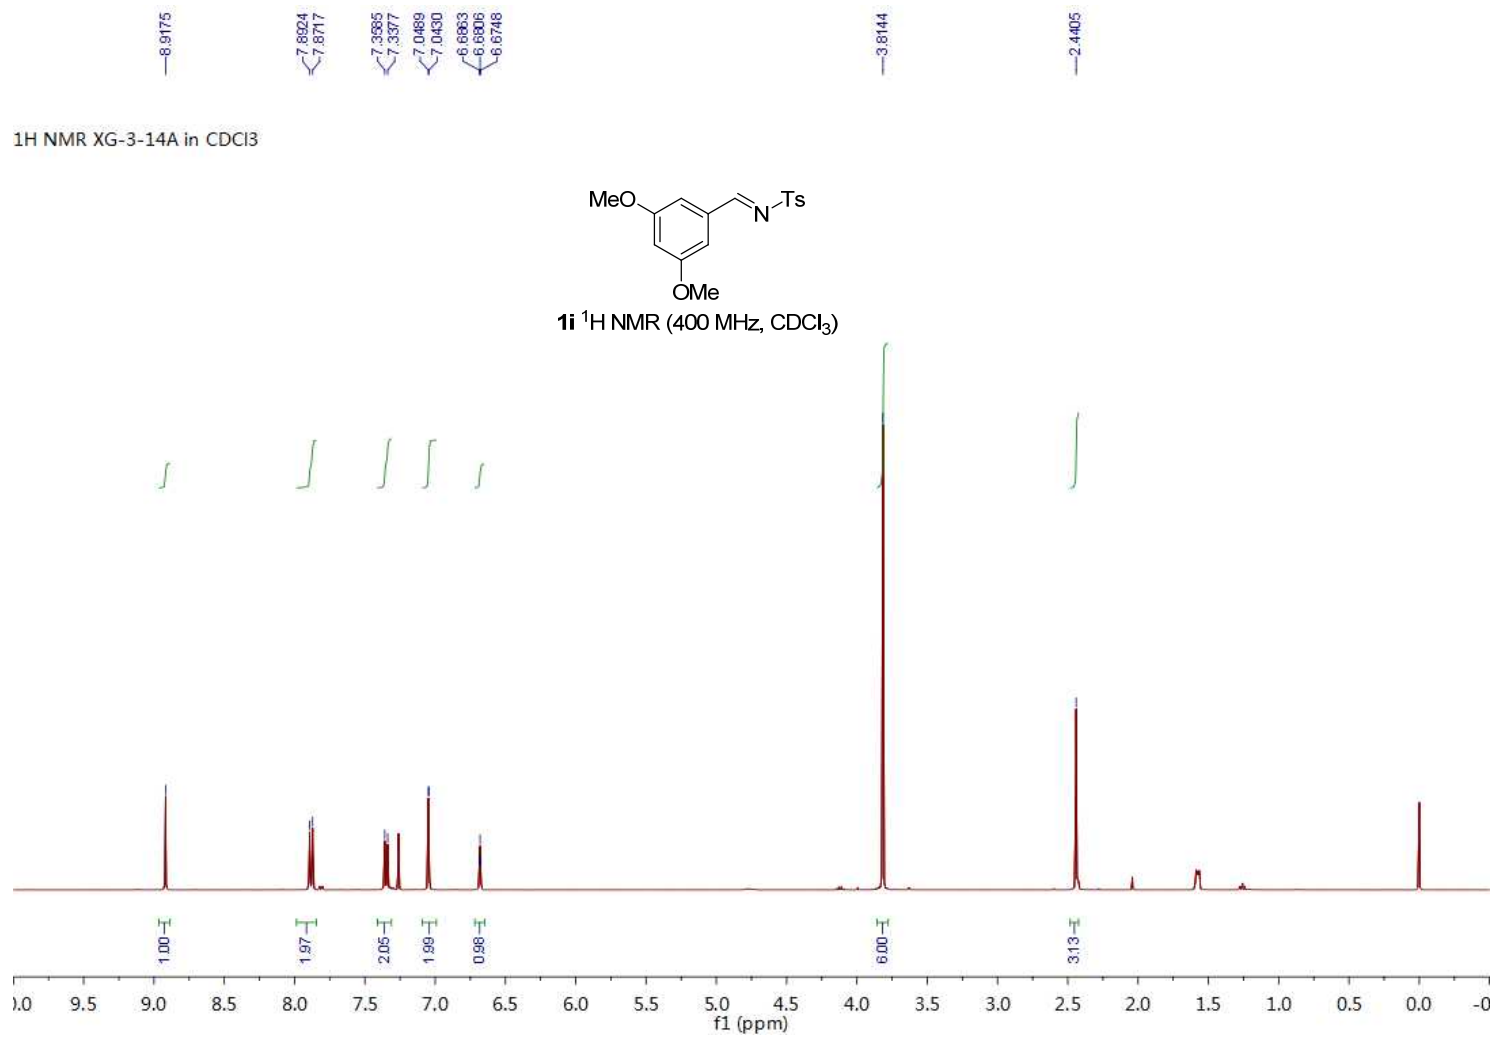

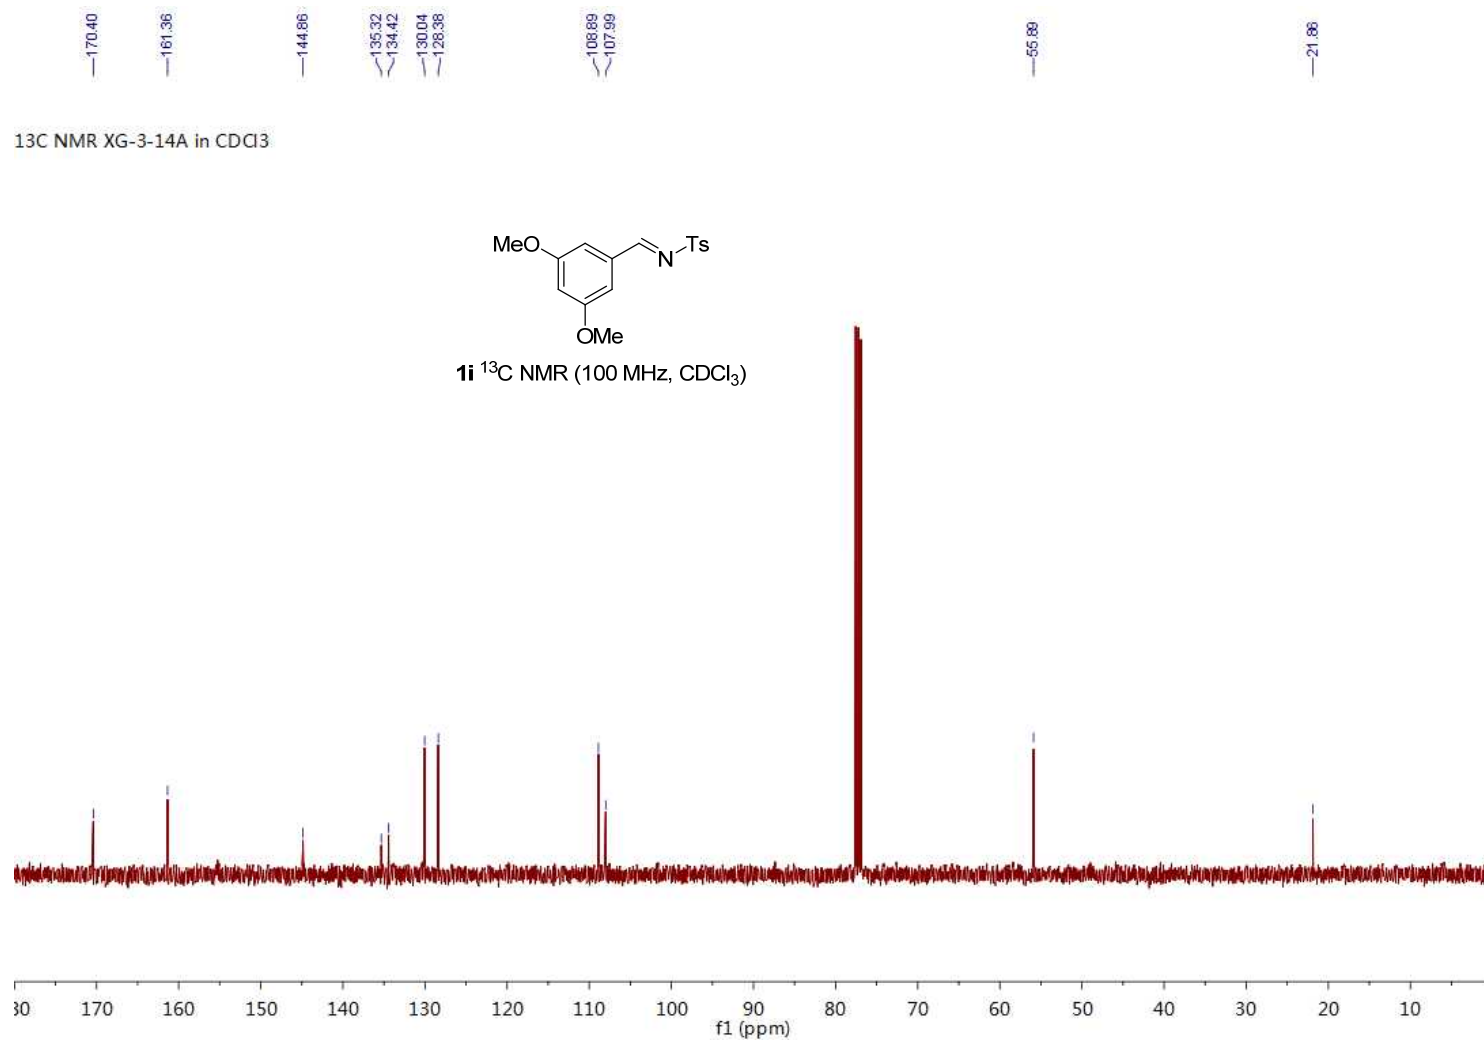

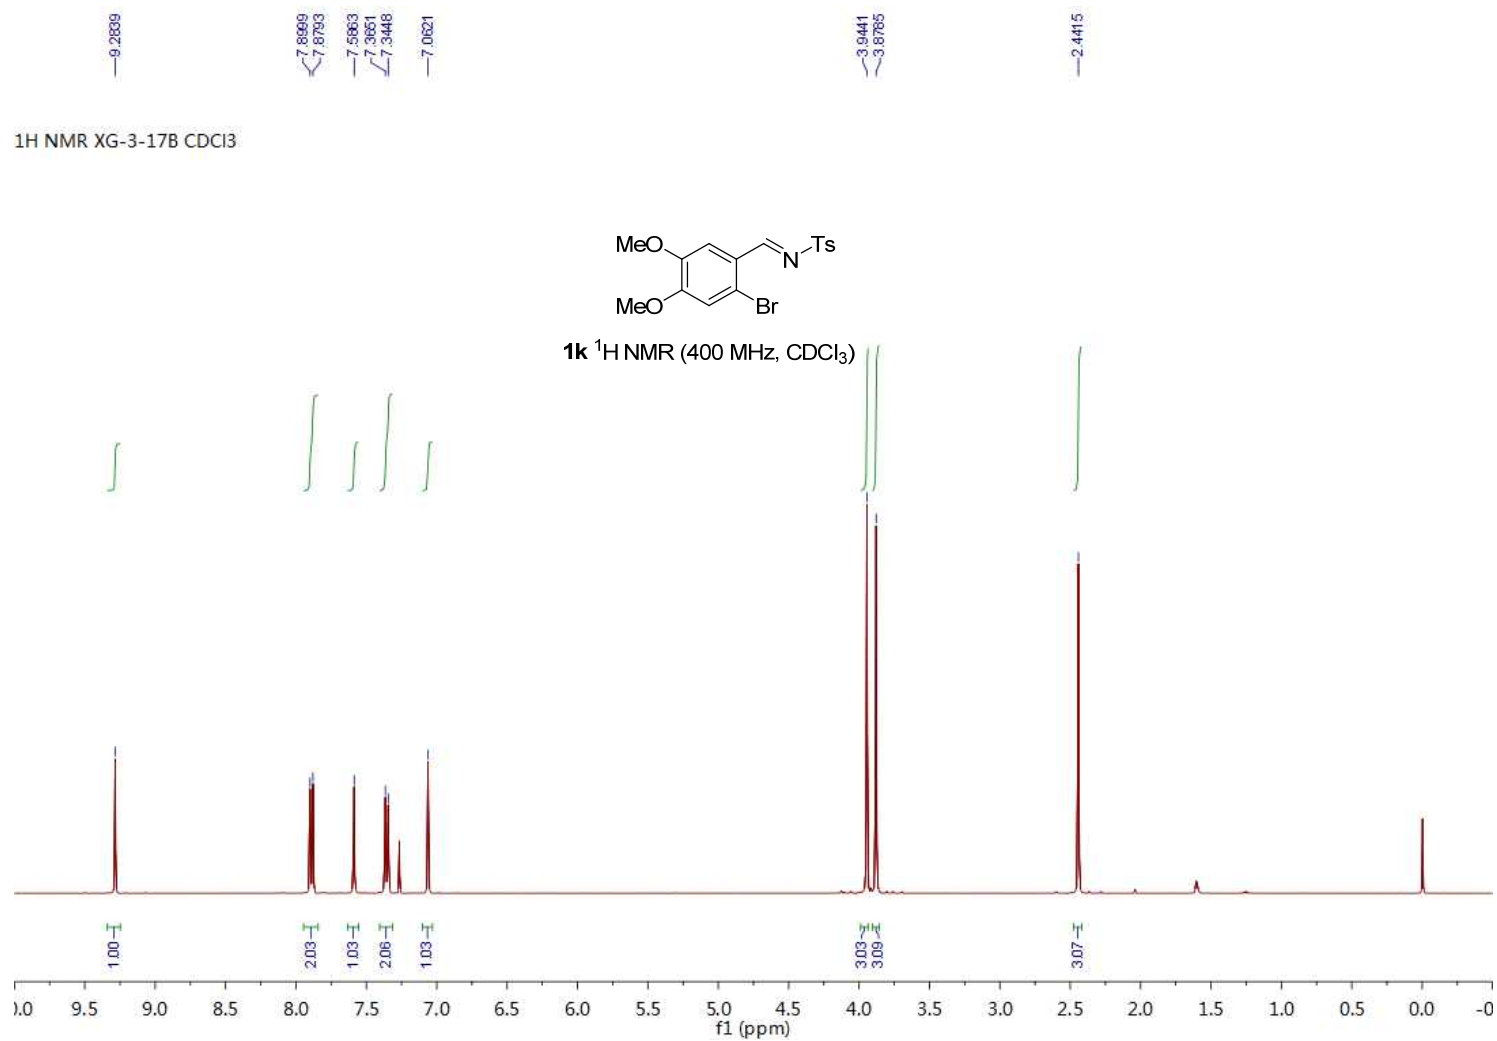

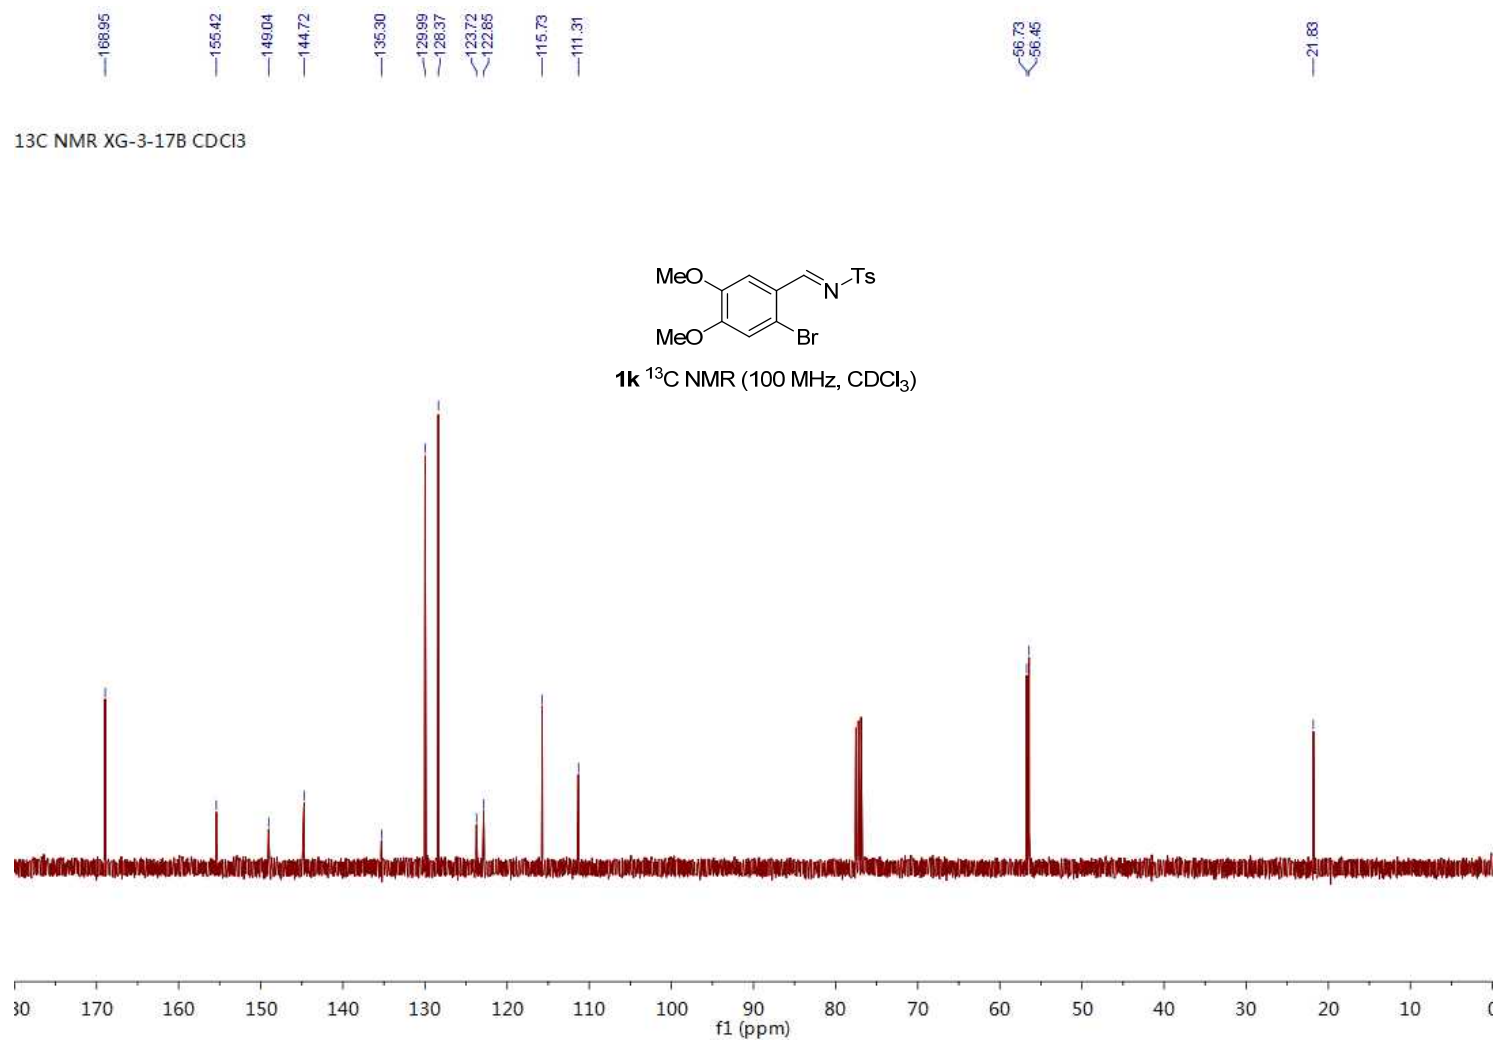

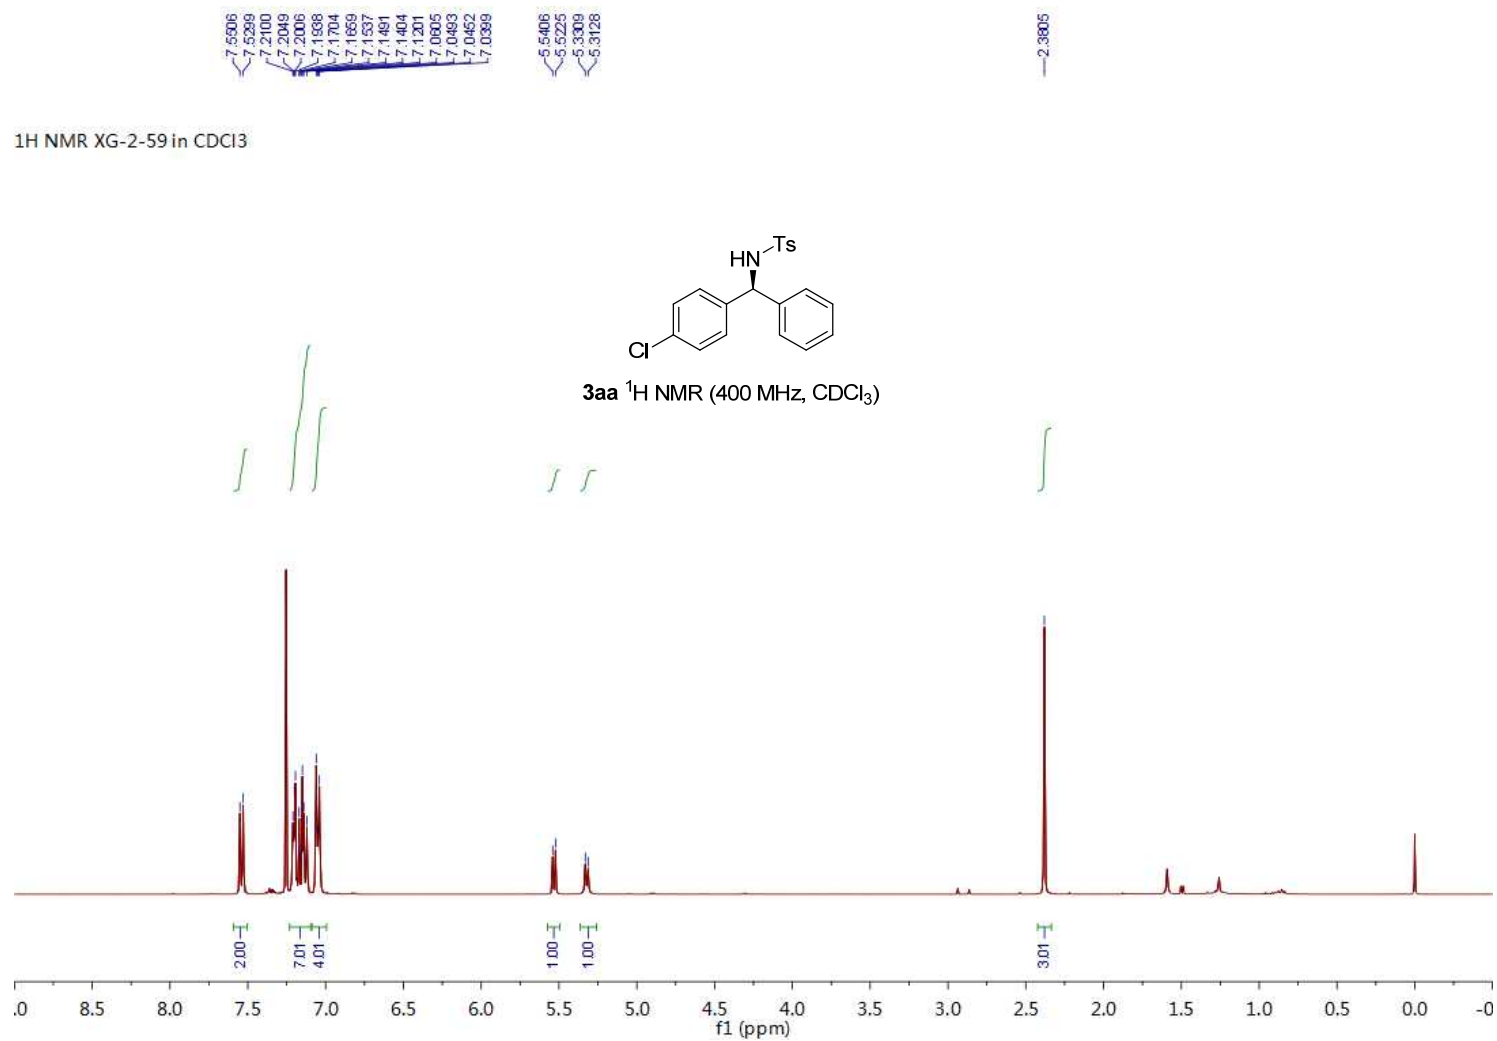

<sup>13</sup>C NMR XG-2-70B CDCl<sub>3</sub>

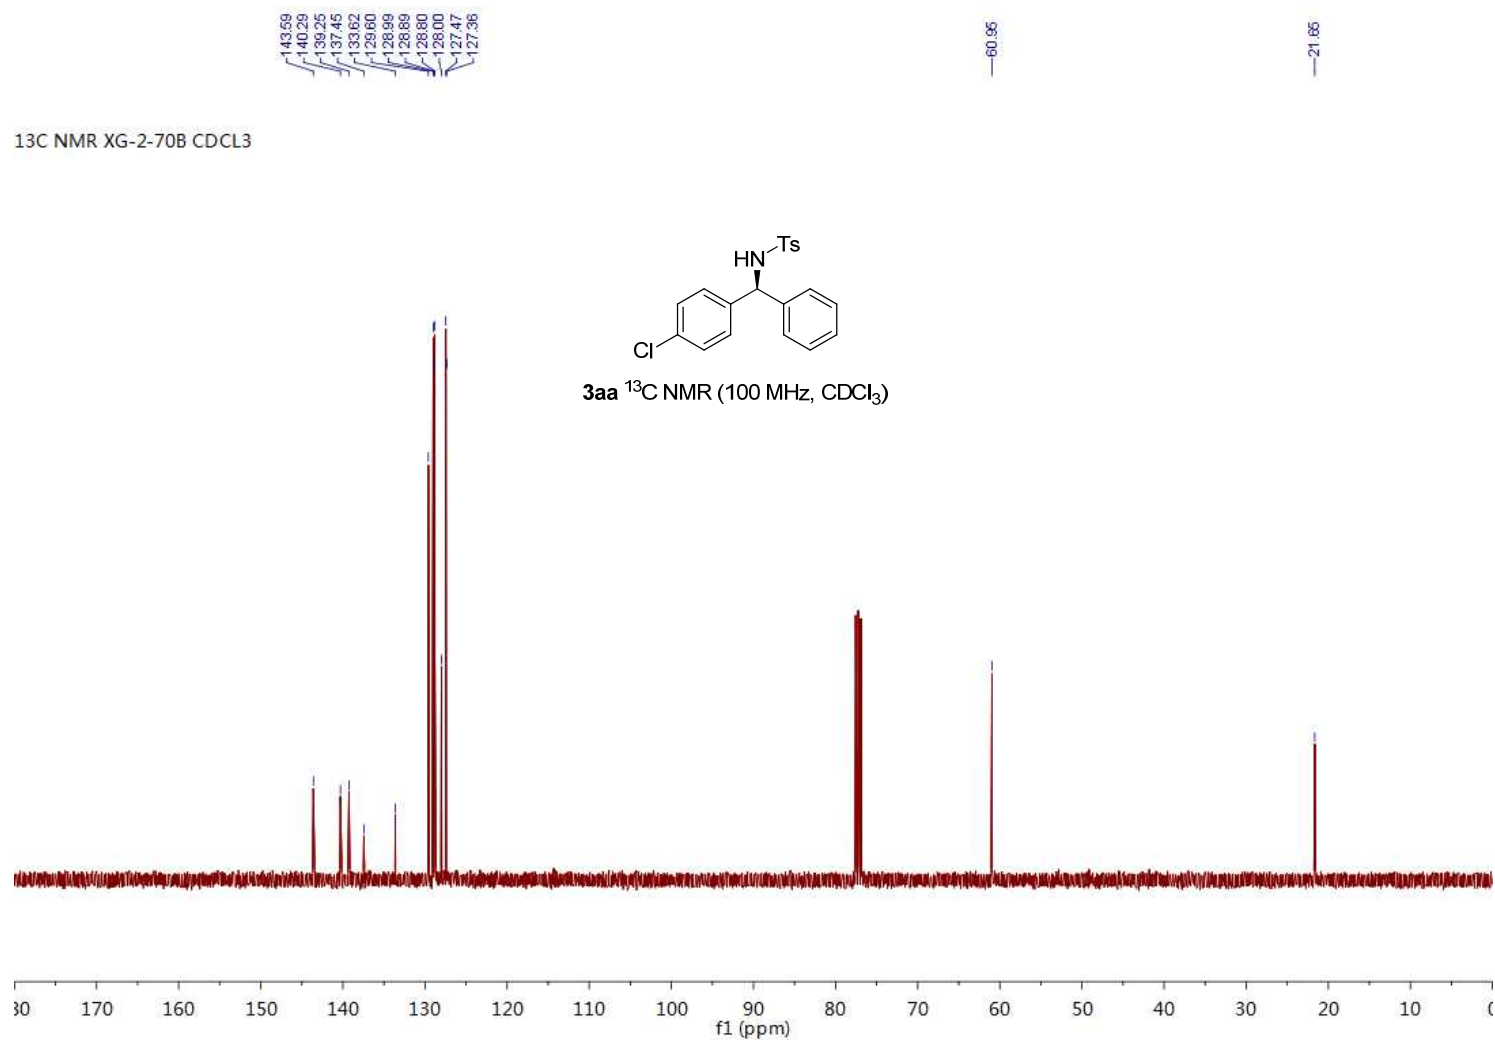

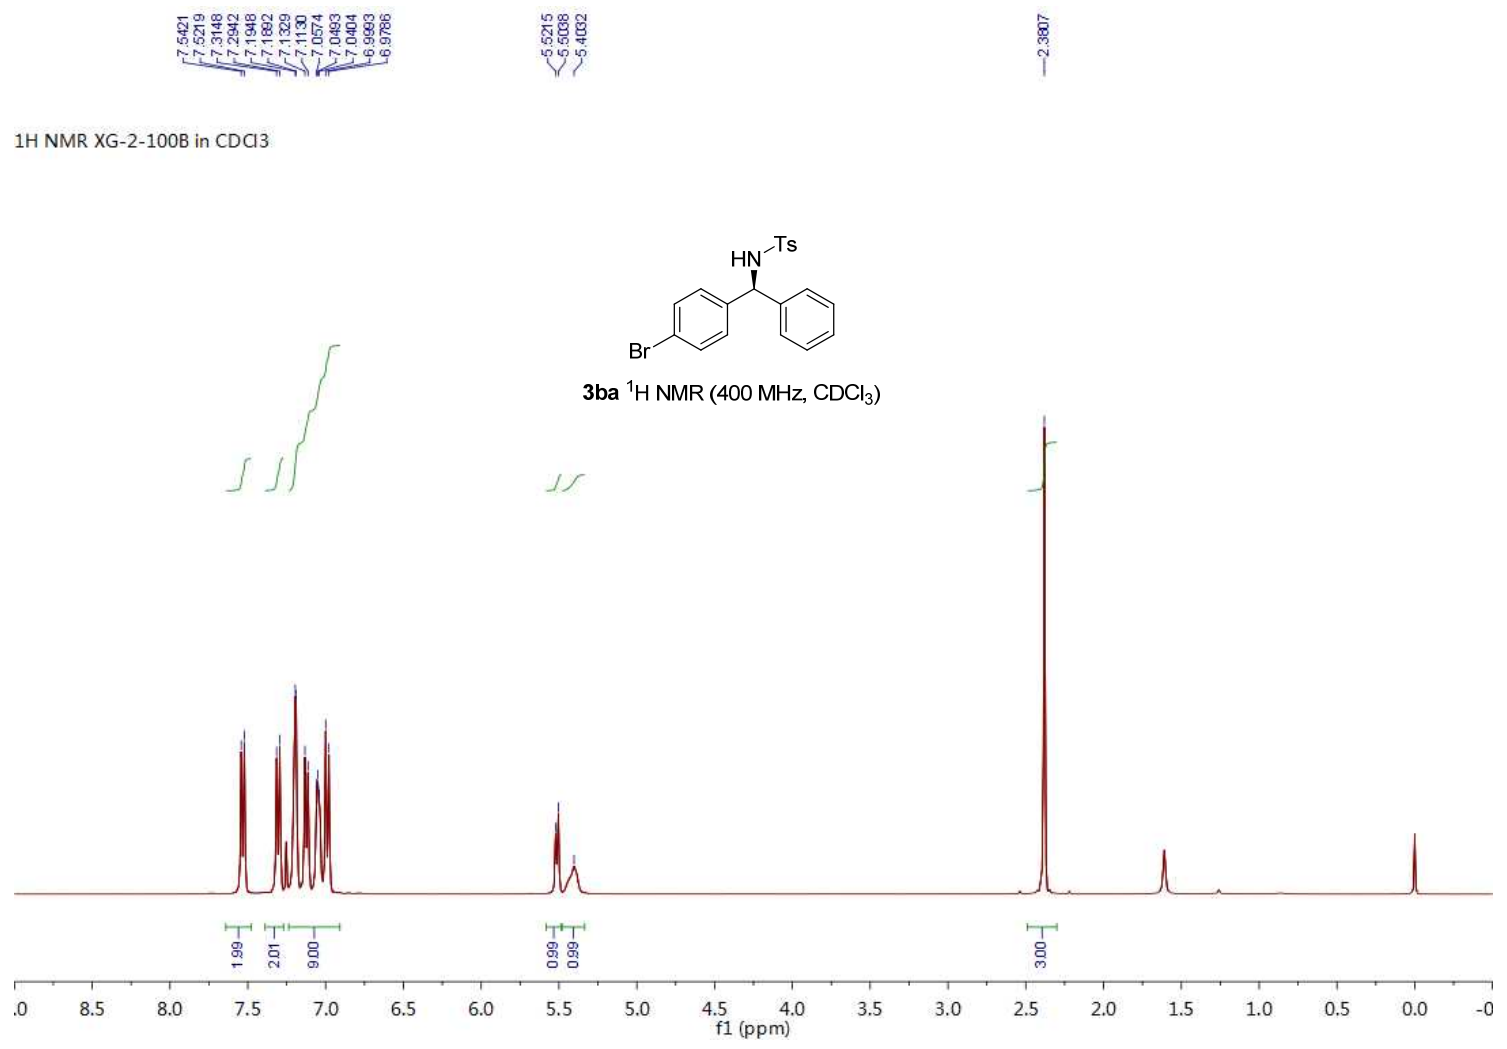



143.63  
140.22  
139.75  
137.43  
131.77  
129.62  
129.34  
128.92  
127.47  
127.37

61.03

21.88

$^{13}\text{C}$  NMR XG-2-100B in  $\text{CDCl}_3$

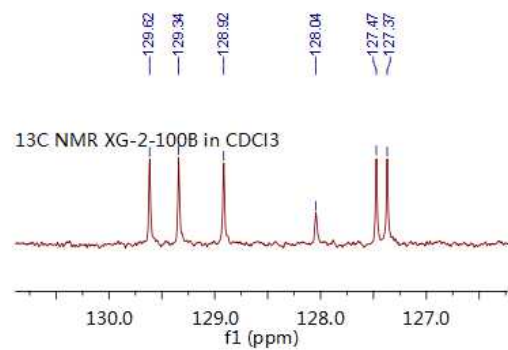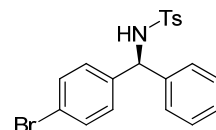

**3ba**  $^{13}\text{C}$  NMR (100 MHz,  $\text{CDCl}_3$ )

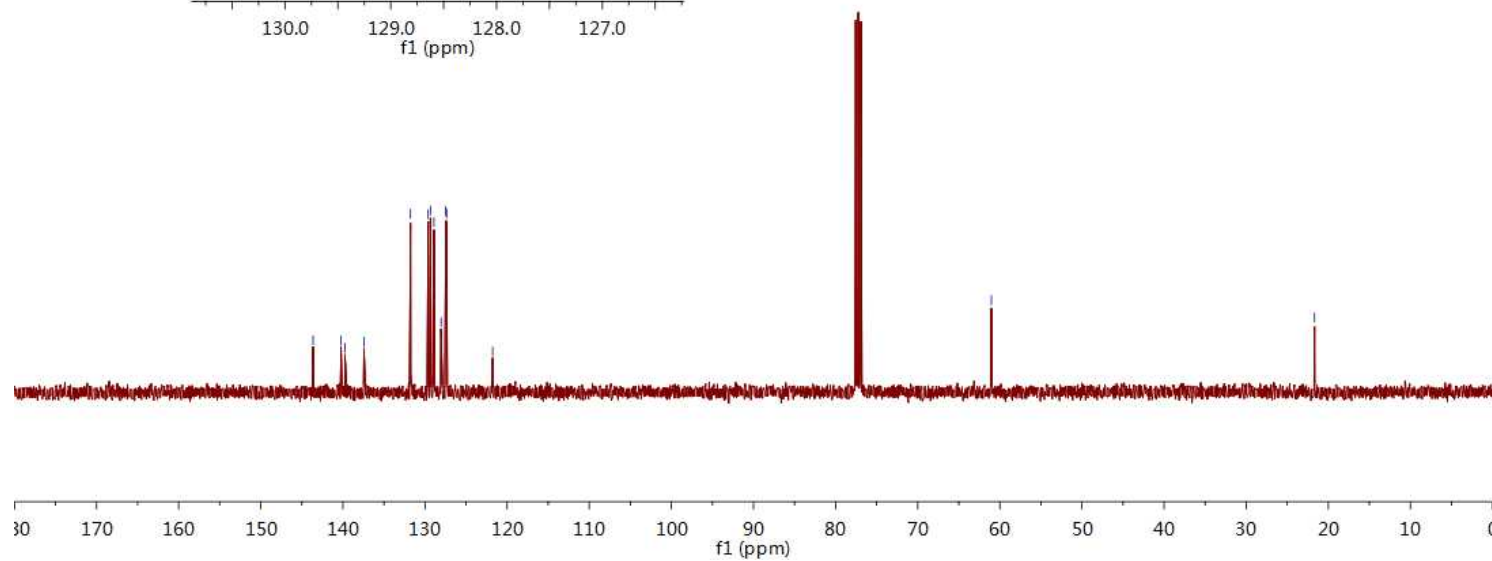

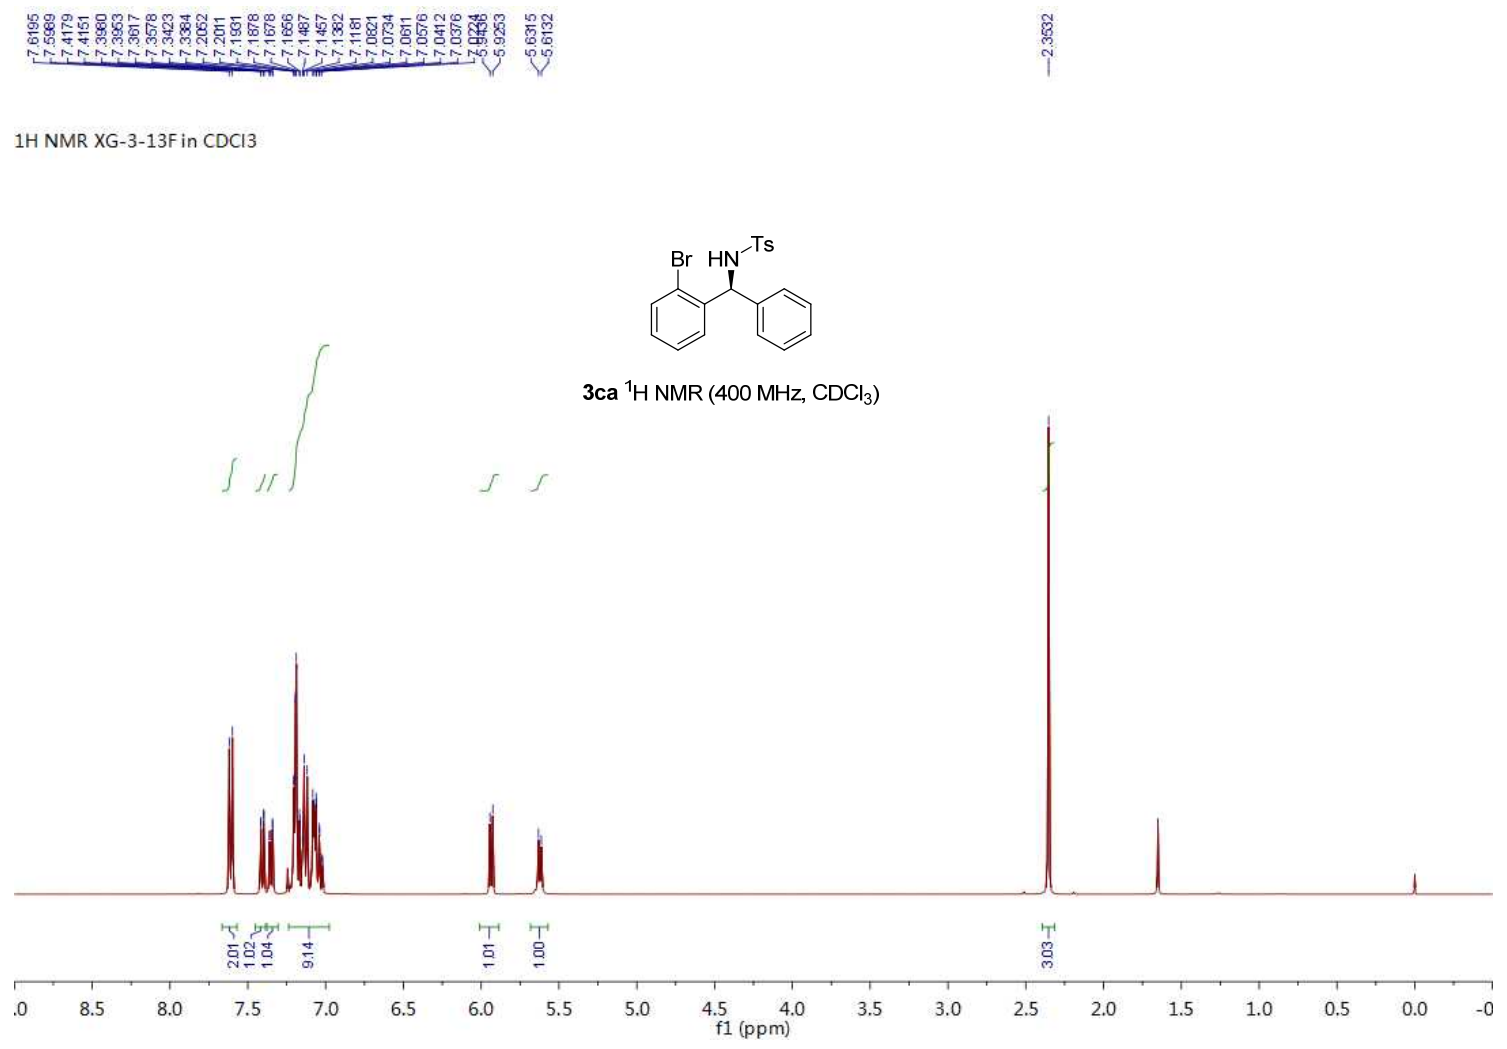

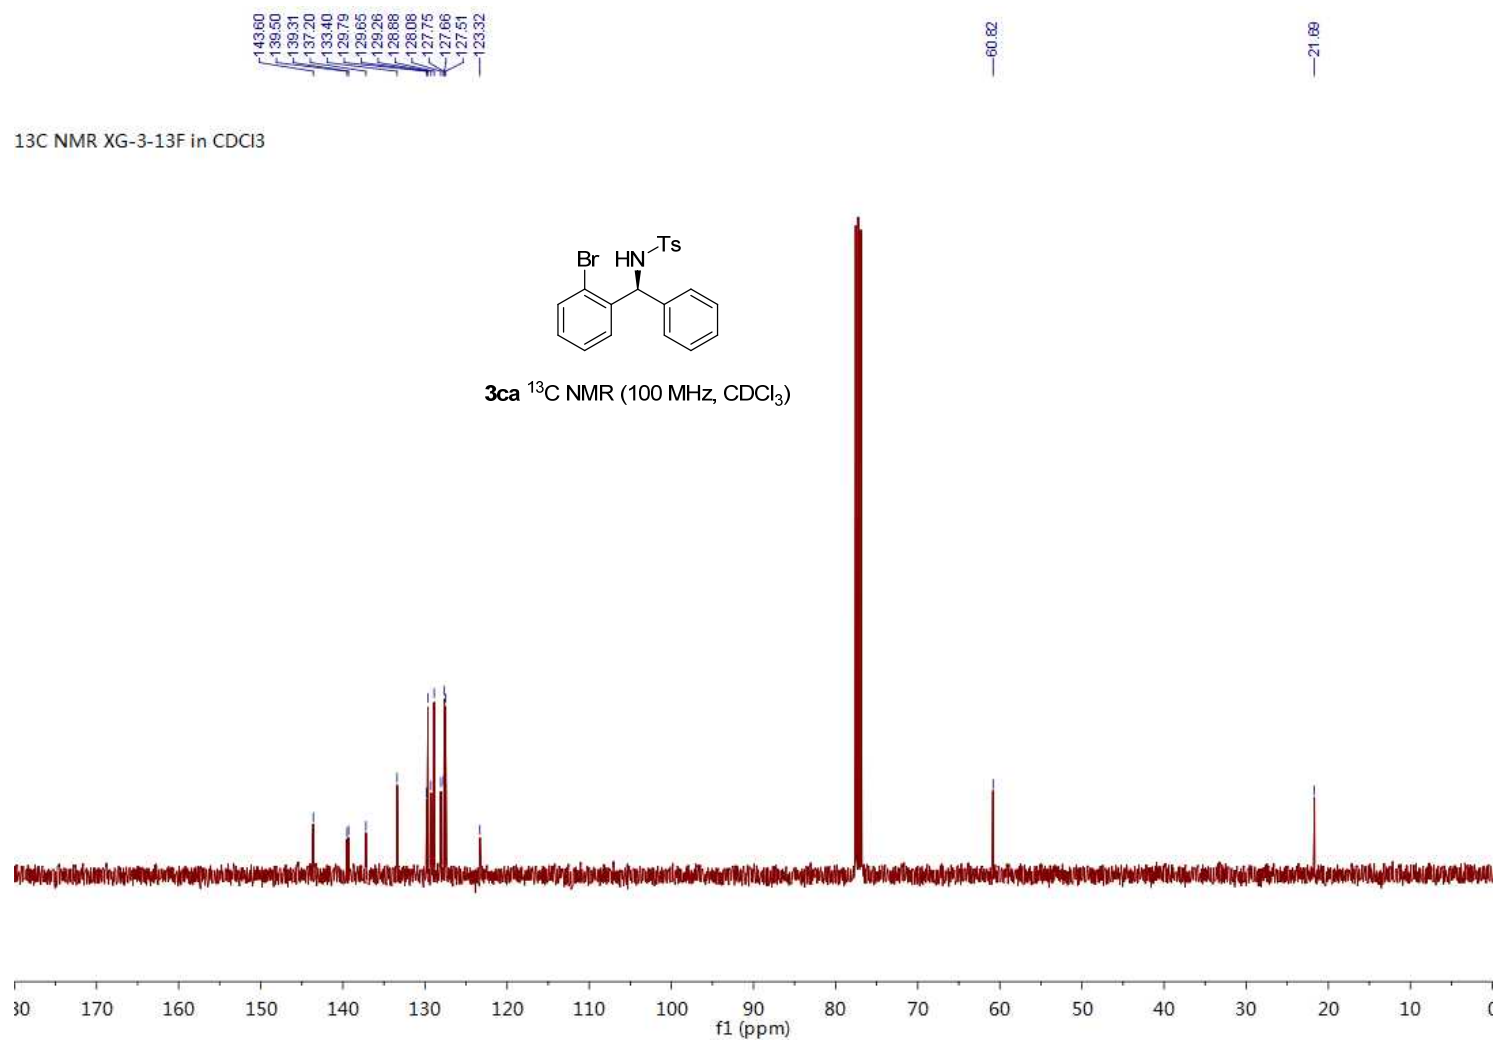

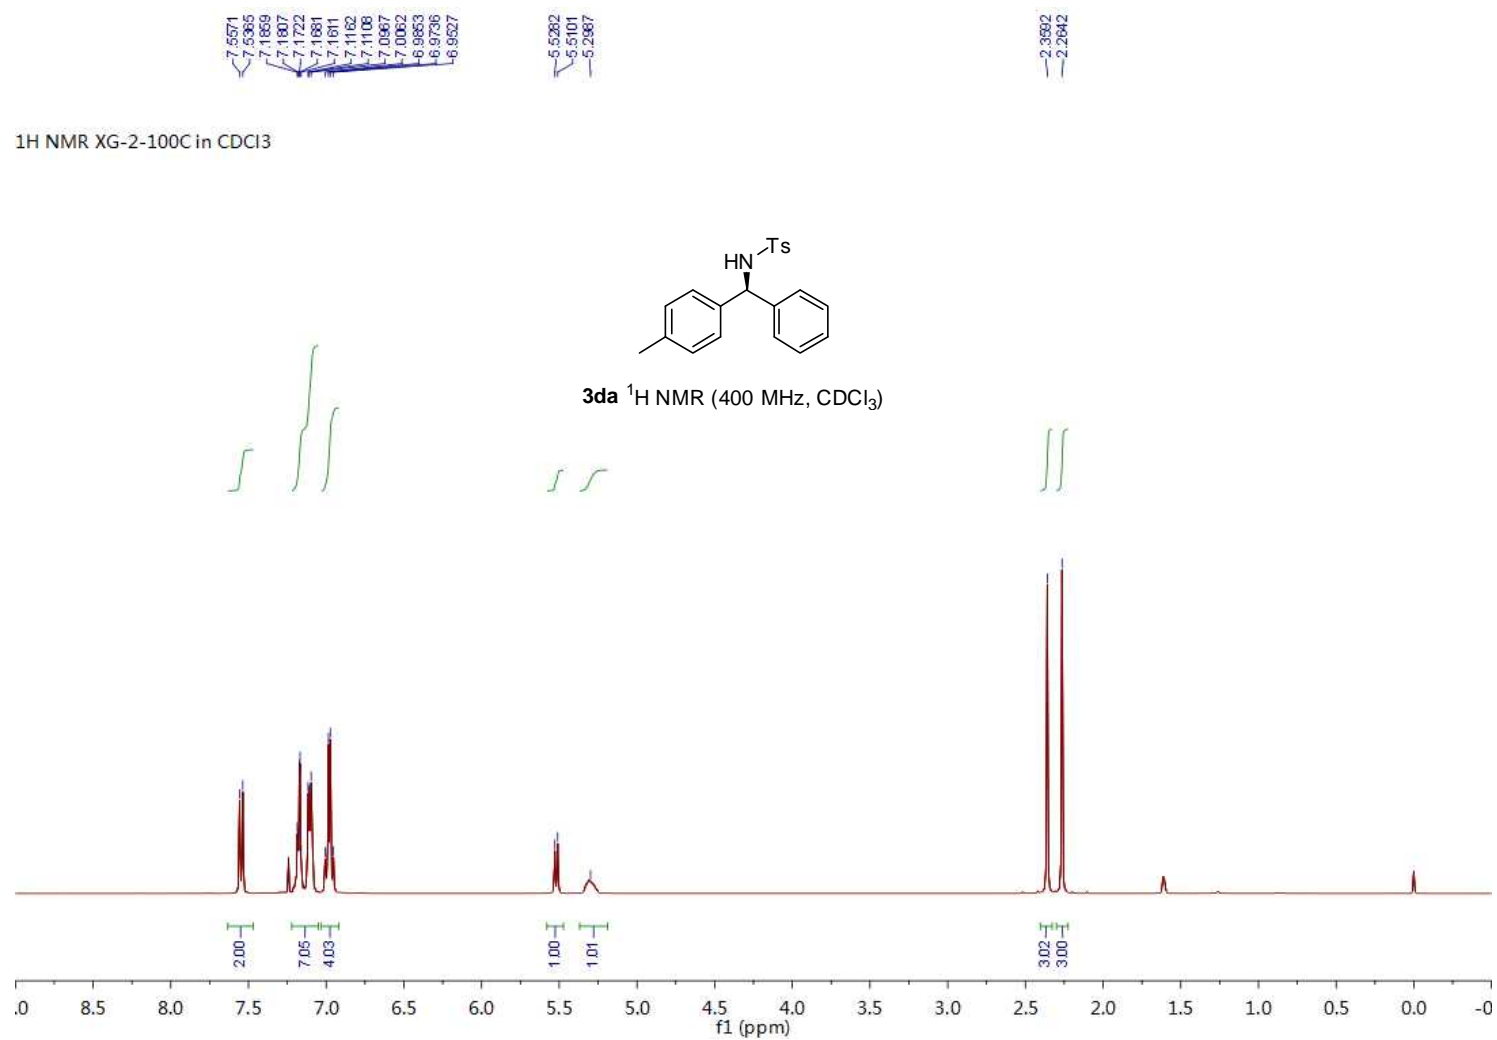

143.26  
140.93  
137.89  
137.67  
137.46  
129.49  
129.38  
128.65  
127.61  
127.50  
127.48  
127.40

61.33

21.63  
21.18

$^{13}\text{C}$  NMR XG-2-100C in  $\text{CDCl}_3$

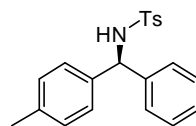

**3da**  $^{13}\text{C}$  NMR (100 MHz,  $\text{CDCl}_3$ )

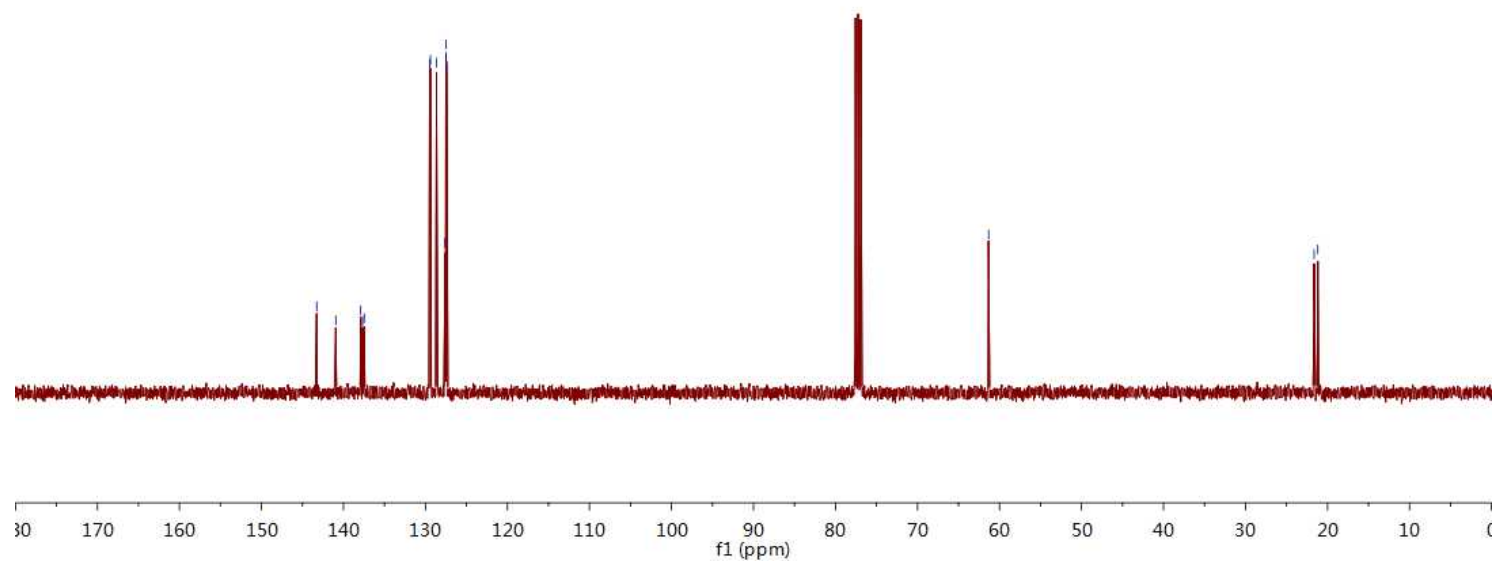

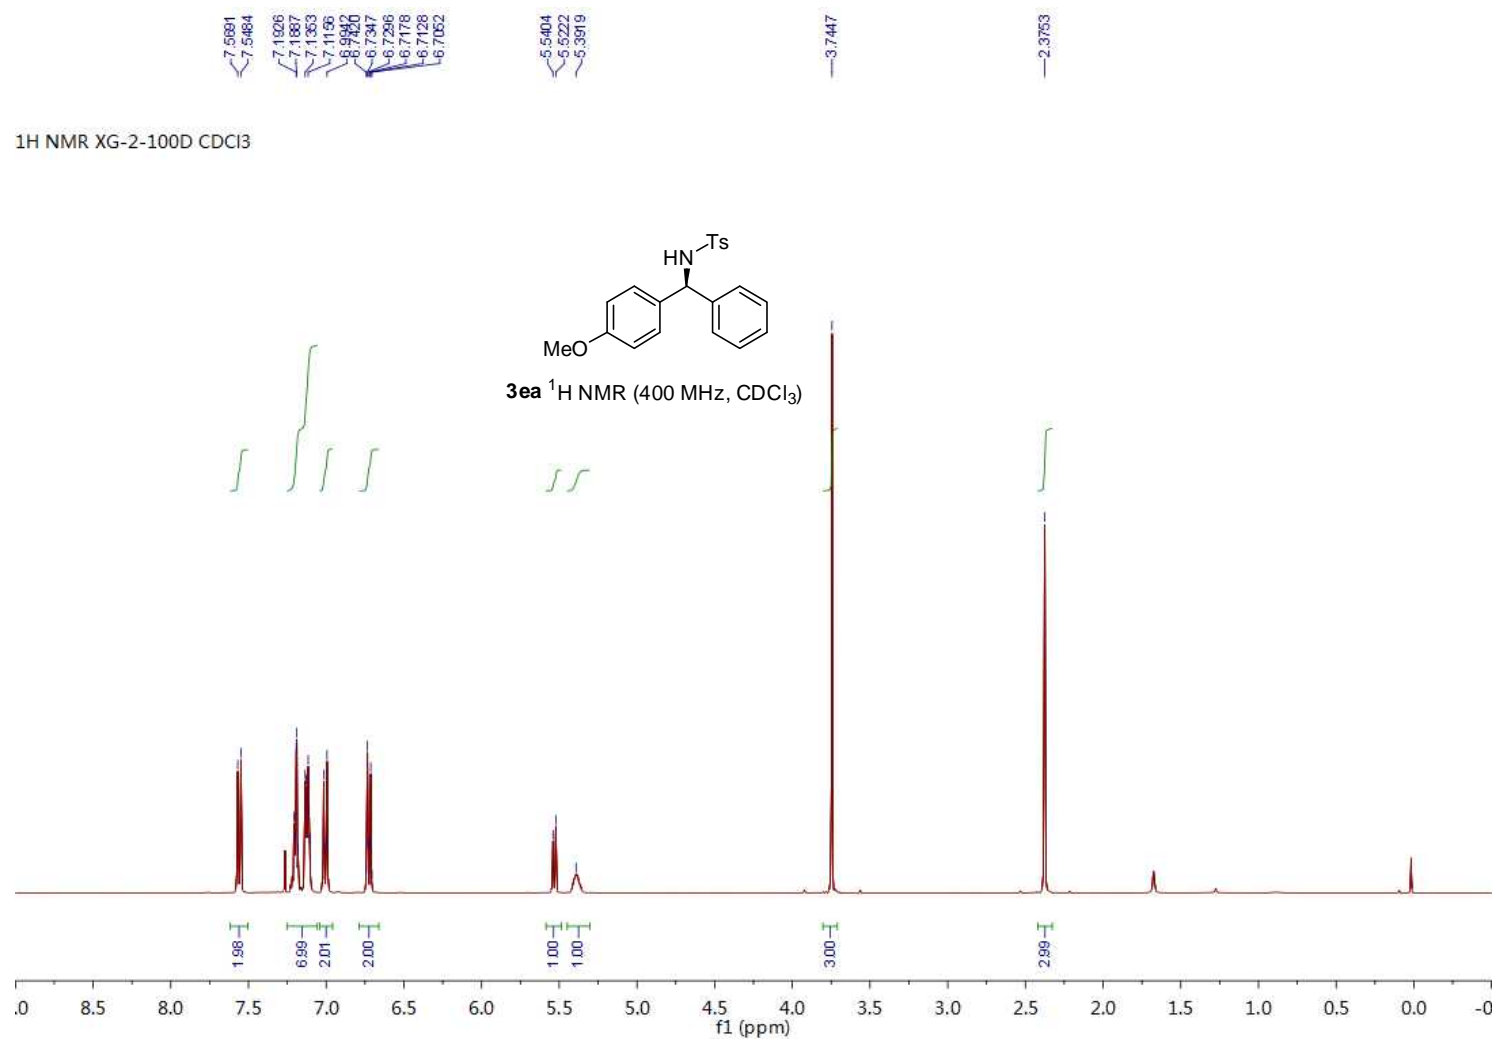

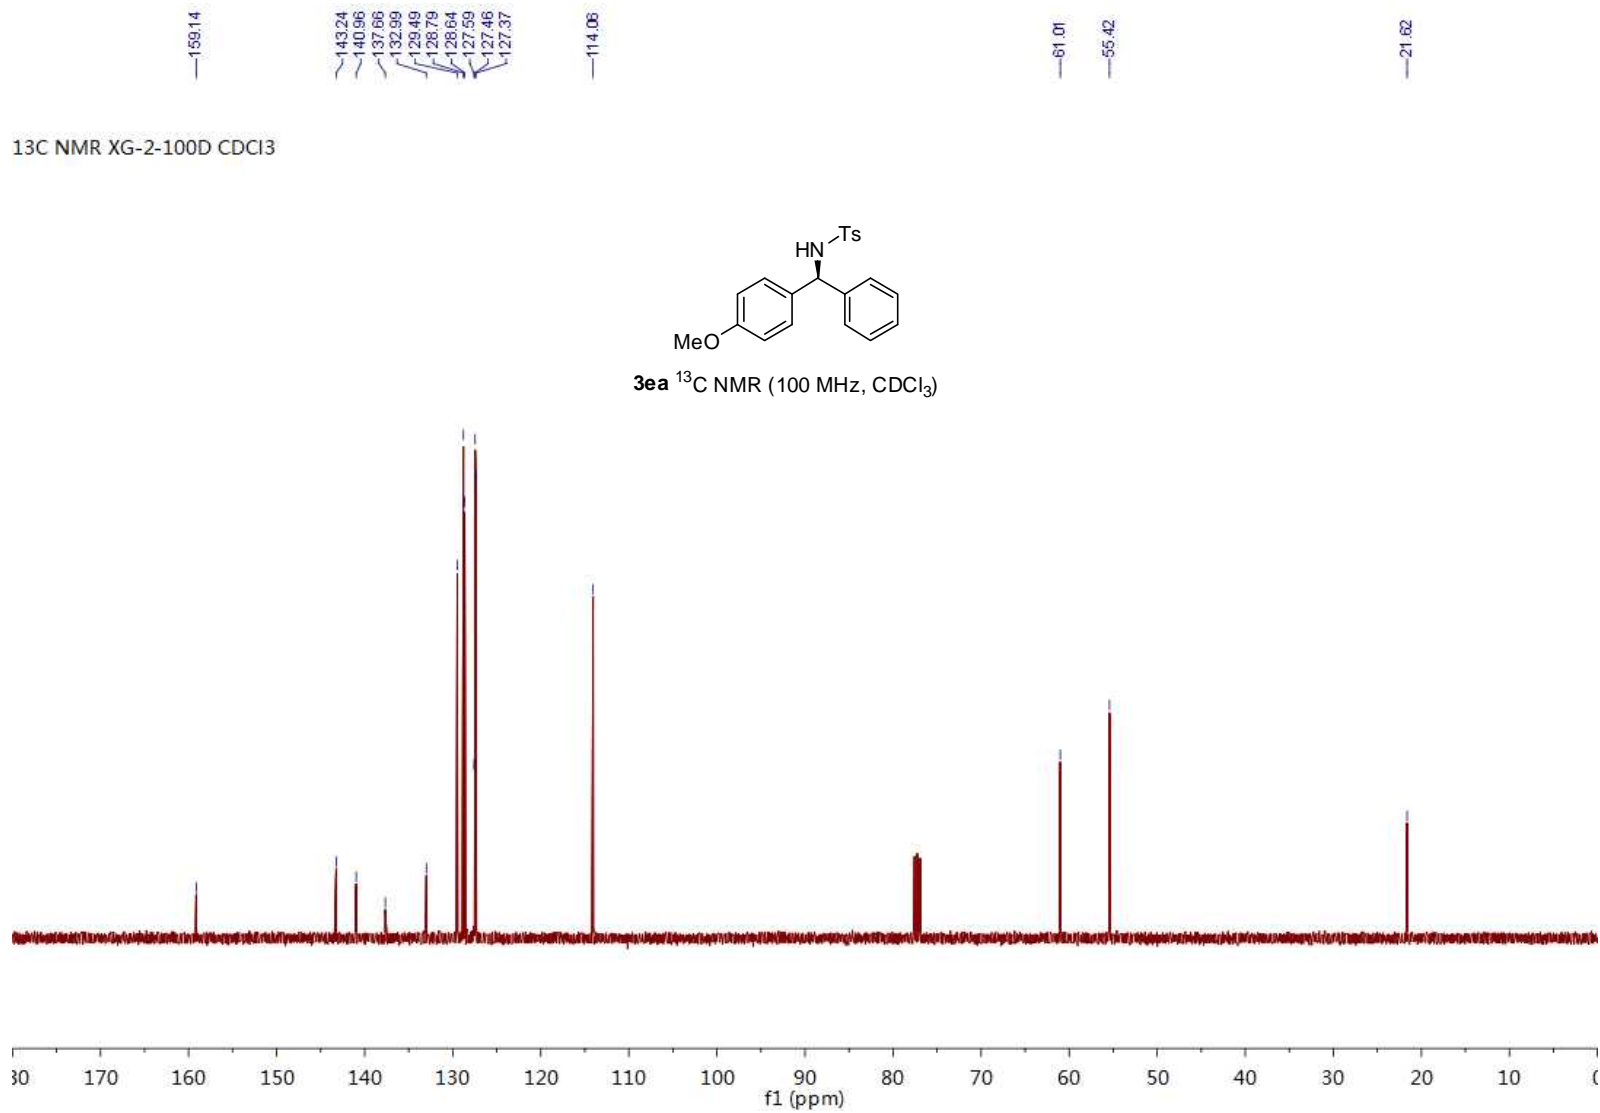

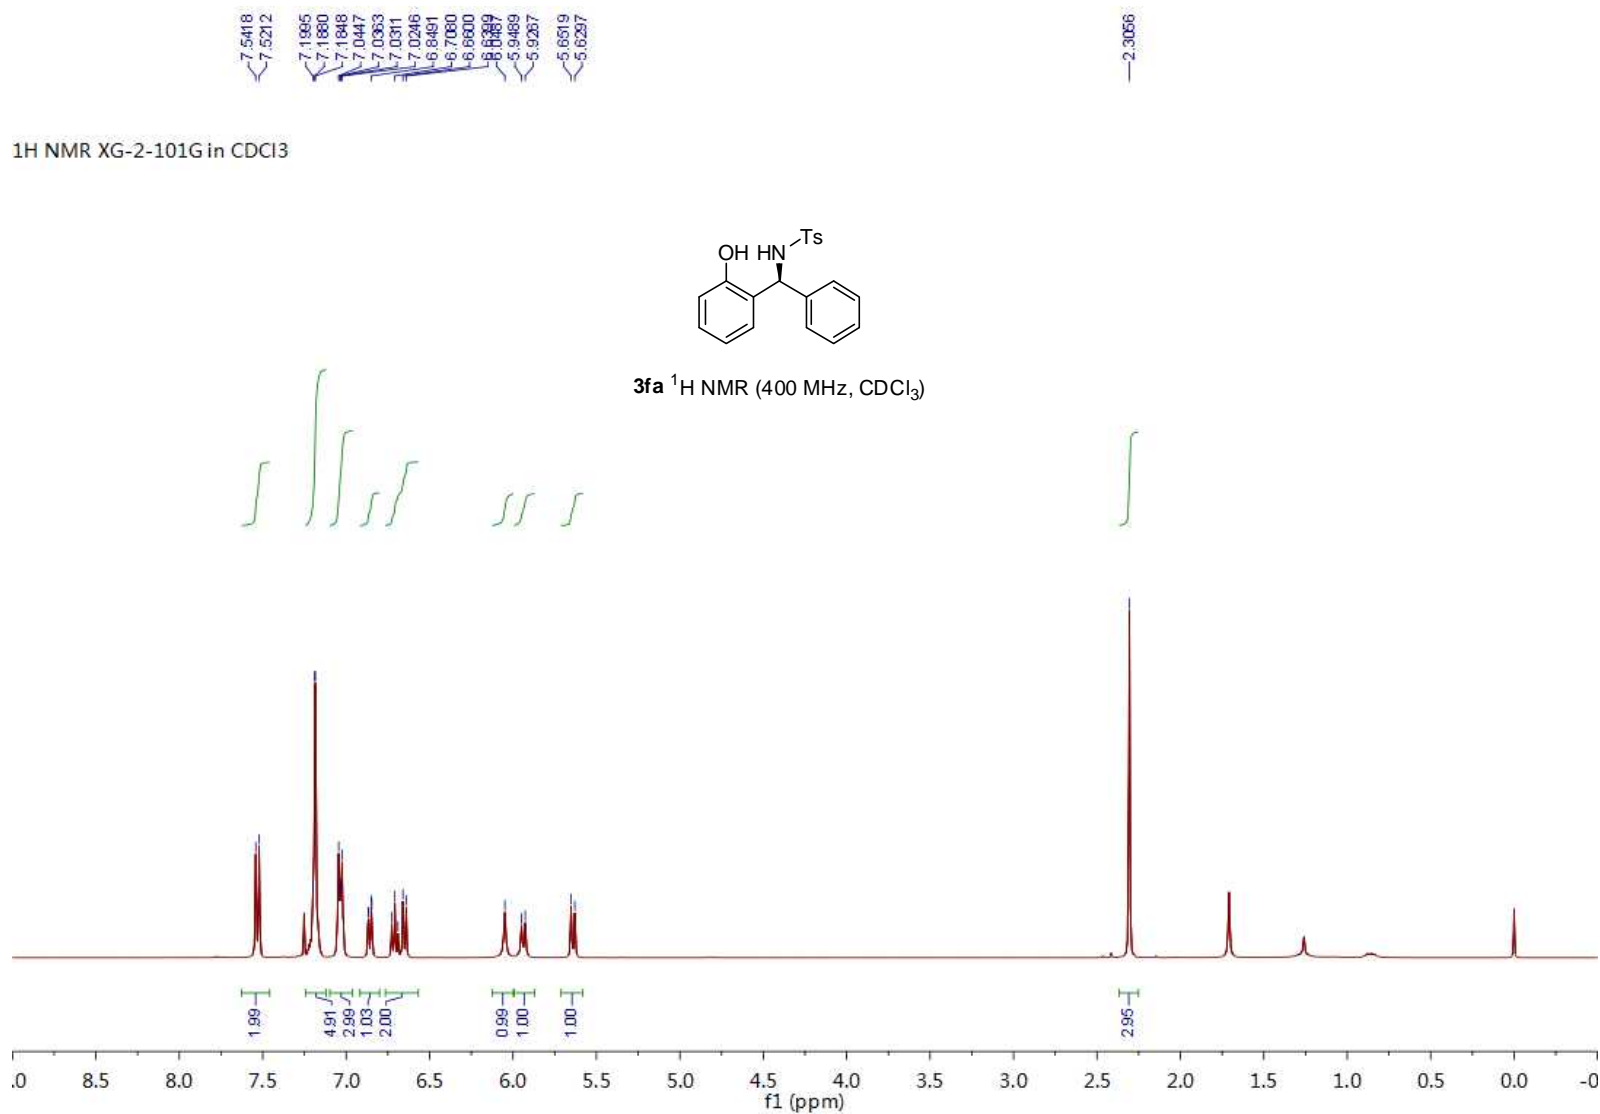



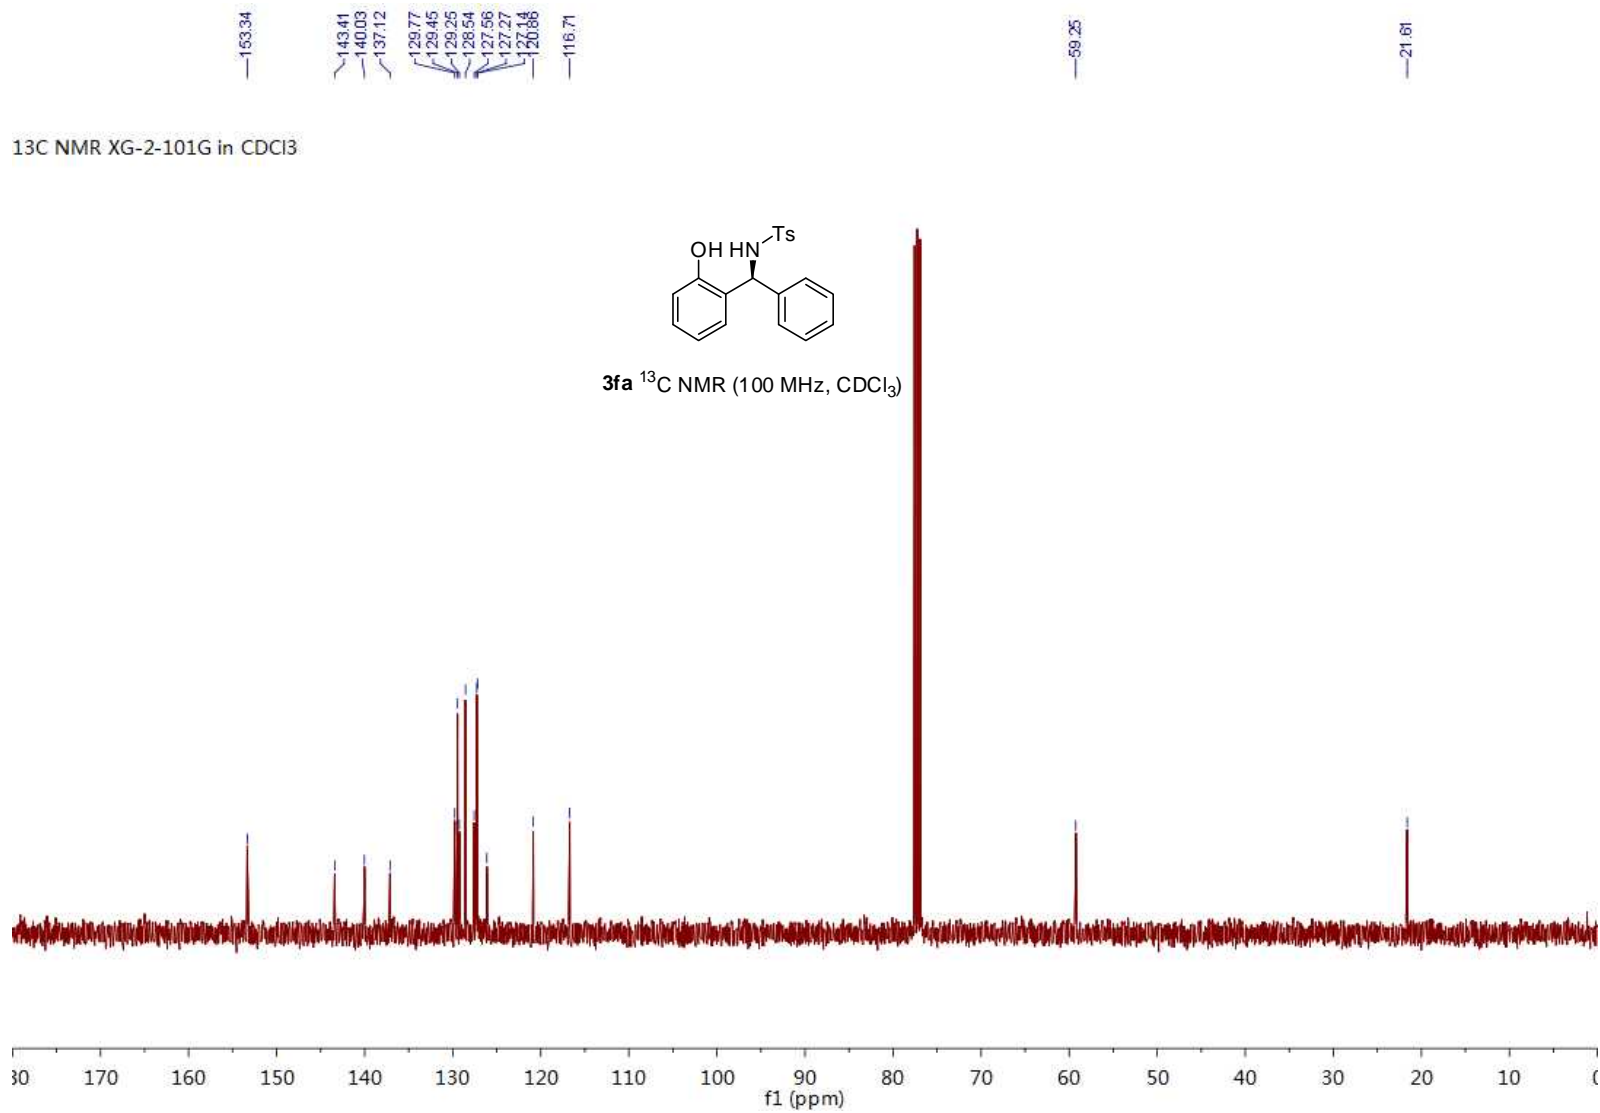

<sup>1</sup>H NMR XG-3-5A in CDCl<sub>3</sub>

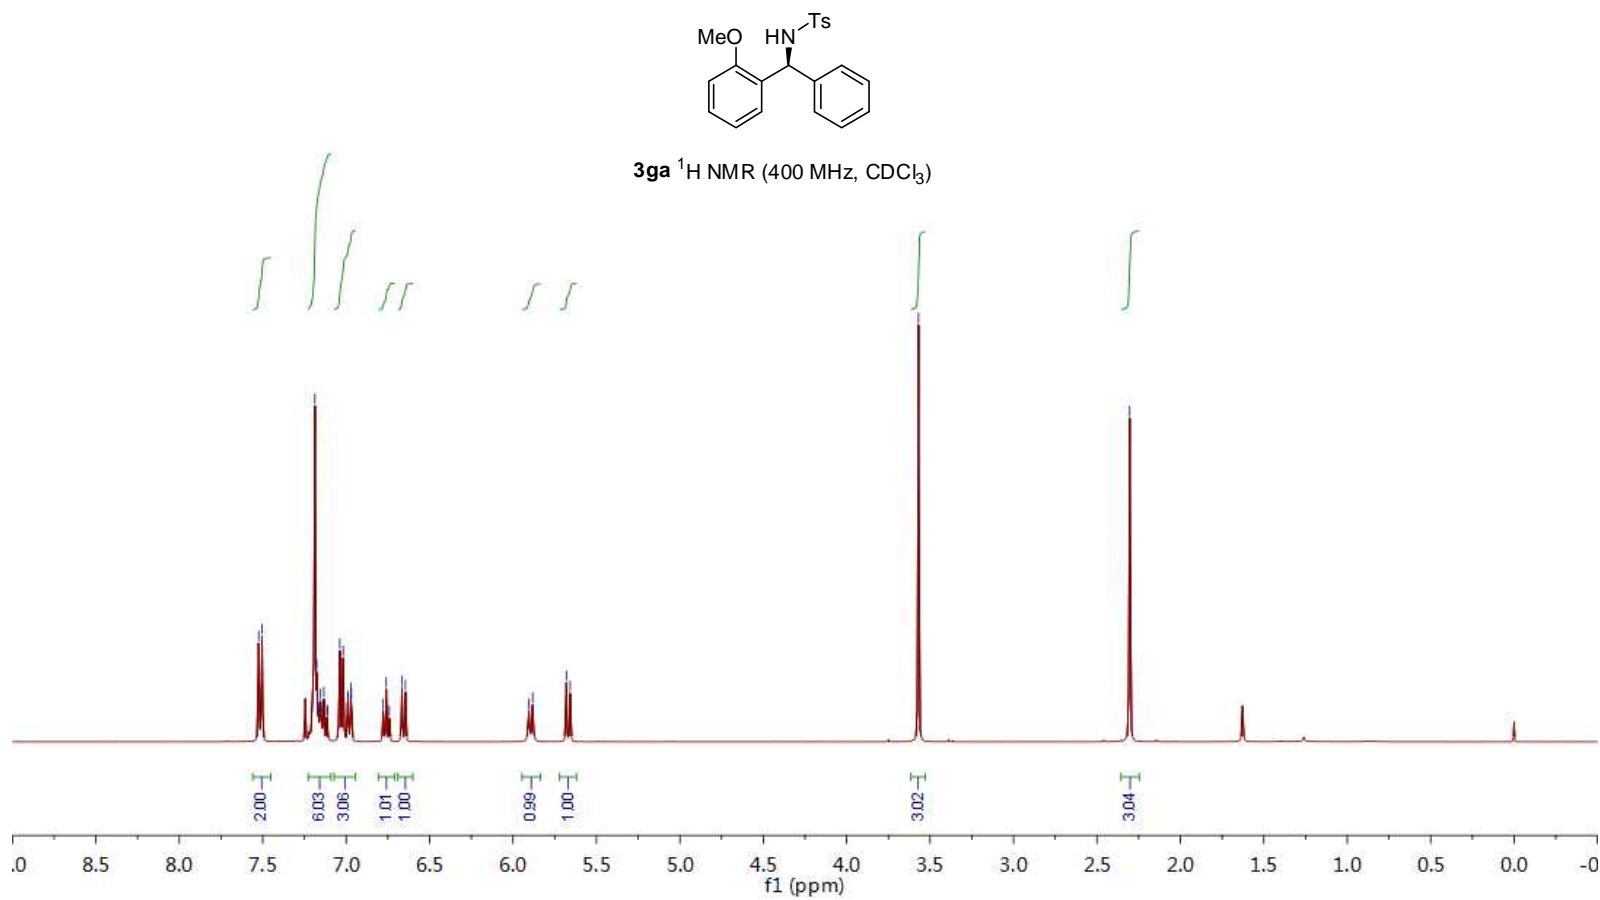

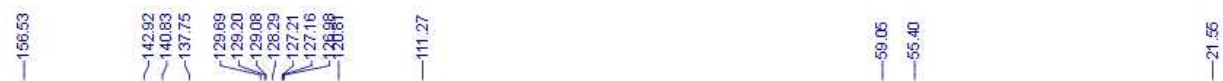

$^{13}\text{C}$  NMR XG-3-5A in  $\text{CDCl}_3$

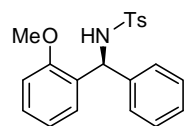

**3ga**  $^{13}\text{C}$  NMR (100 MHz,  $\text{CDCl}_3$ )

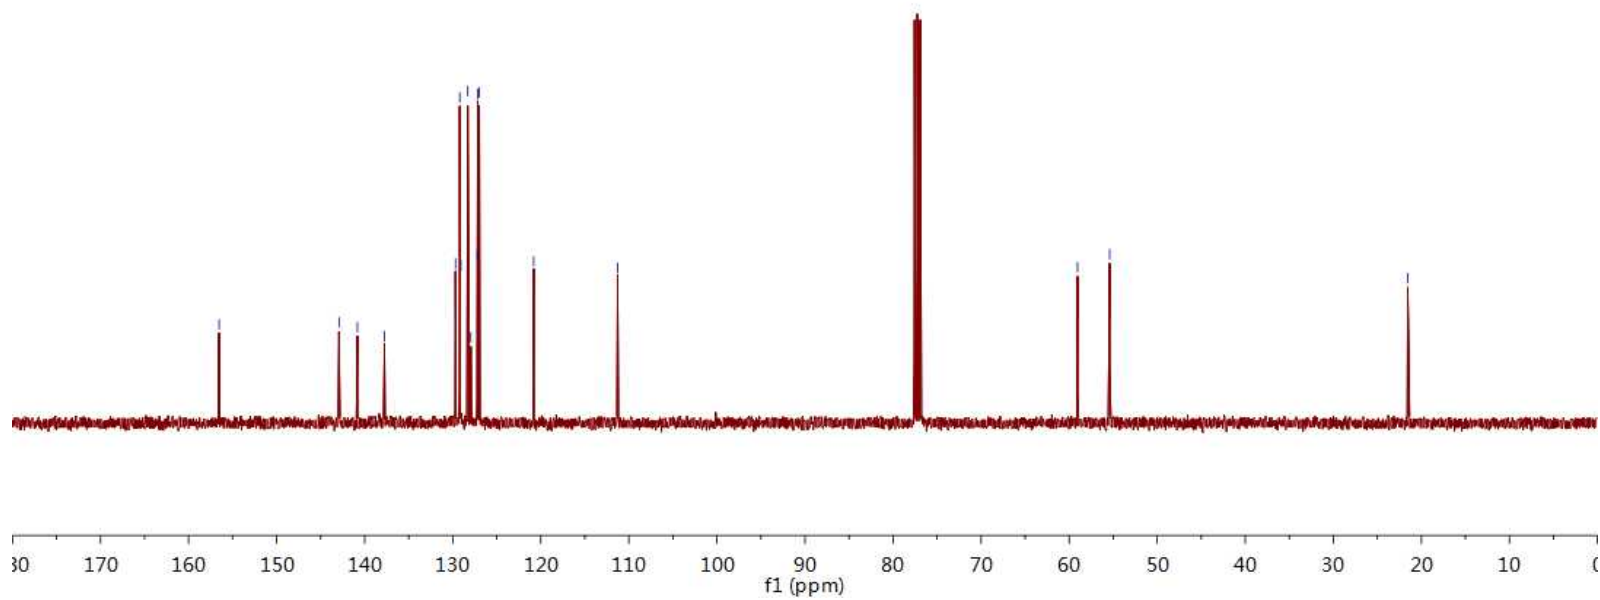

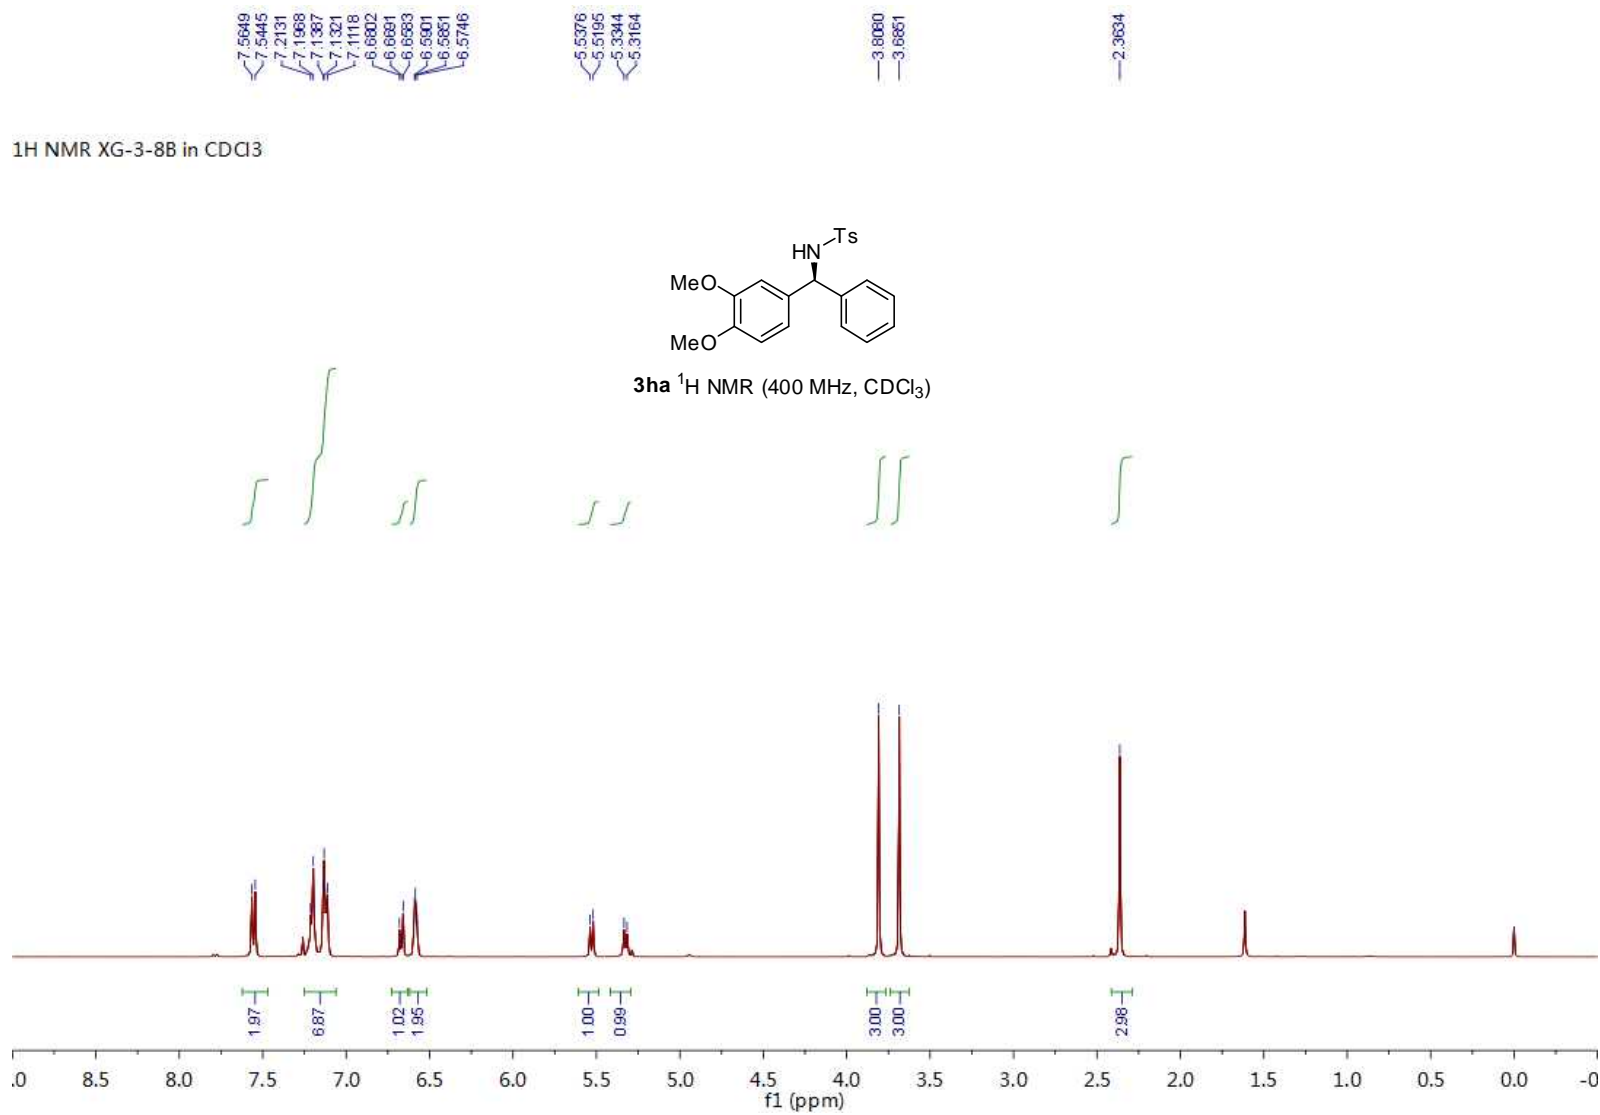

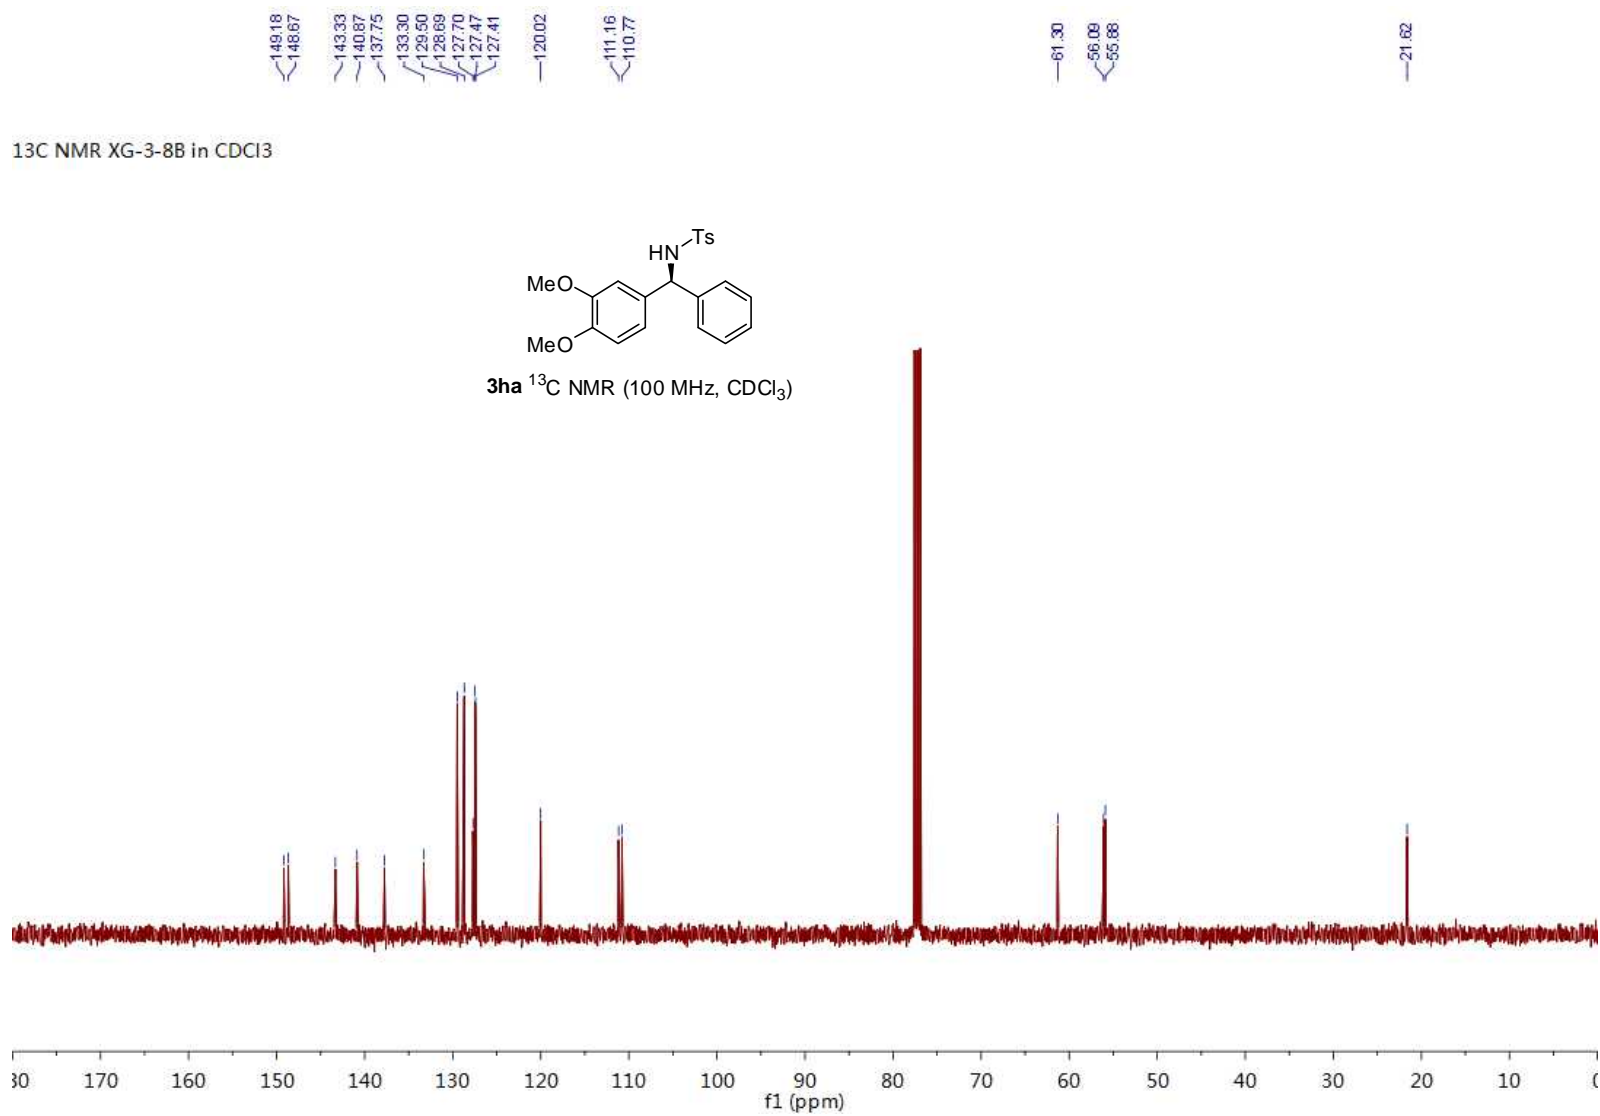

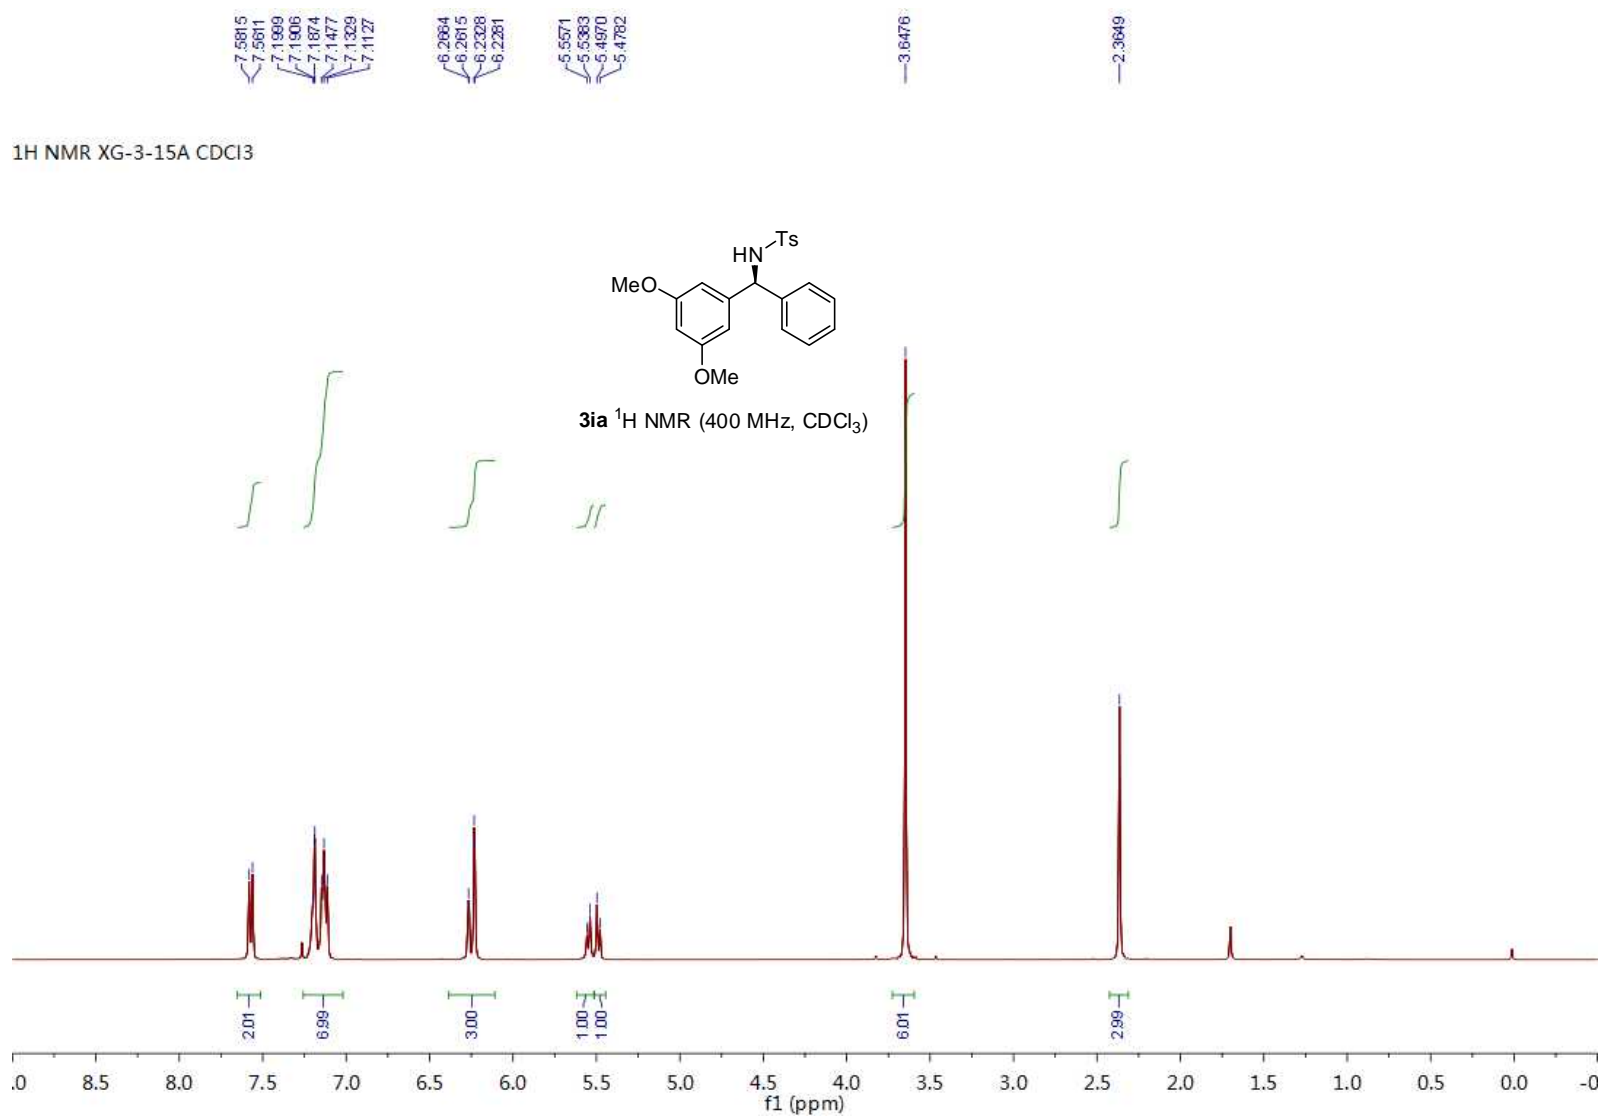

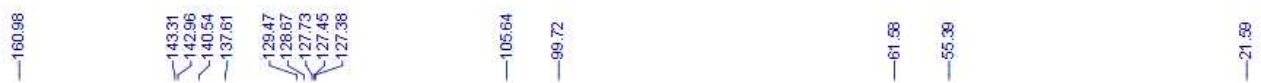

<sup>13</sup>C NMR XG-3-15A CDCl<sub>3</sub>

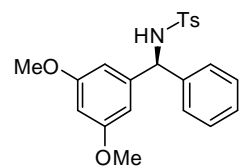

**3ia** <sup>13</sup>C NMR (100 MHz, CDCl<sub>3</sub>)

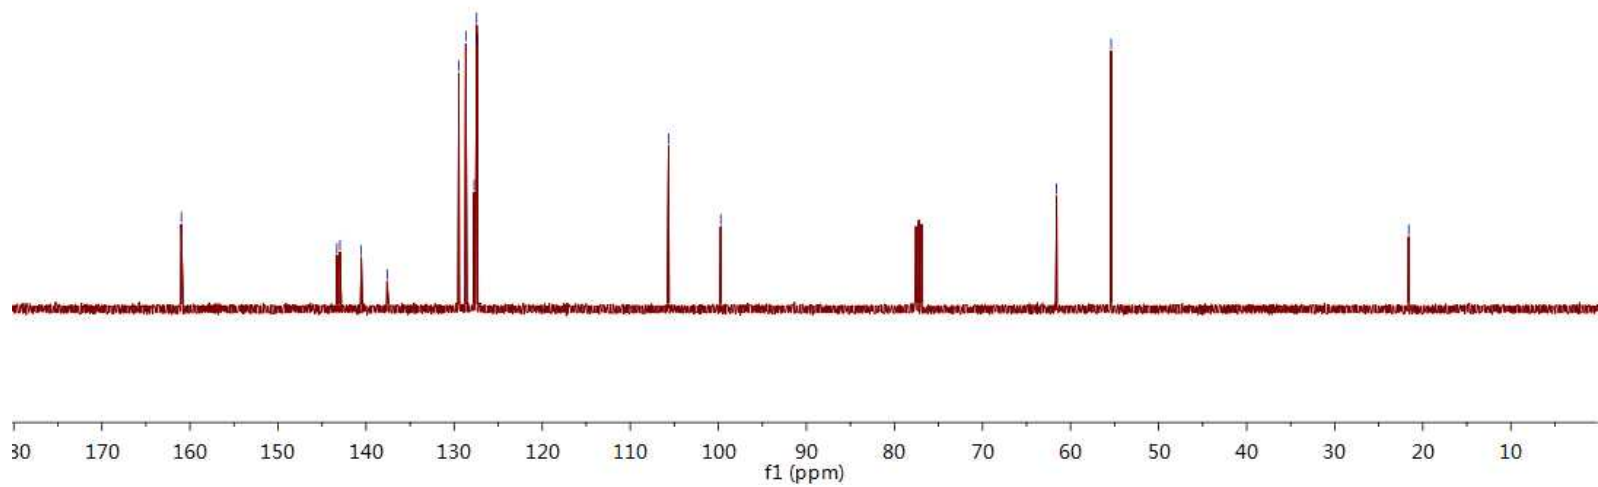

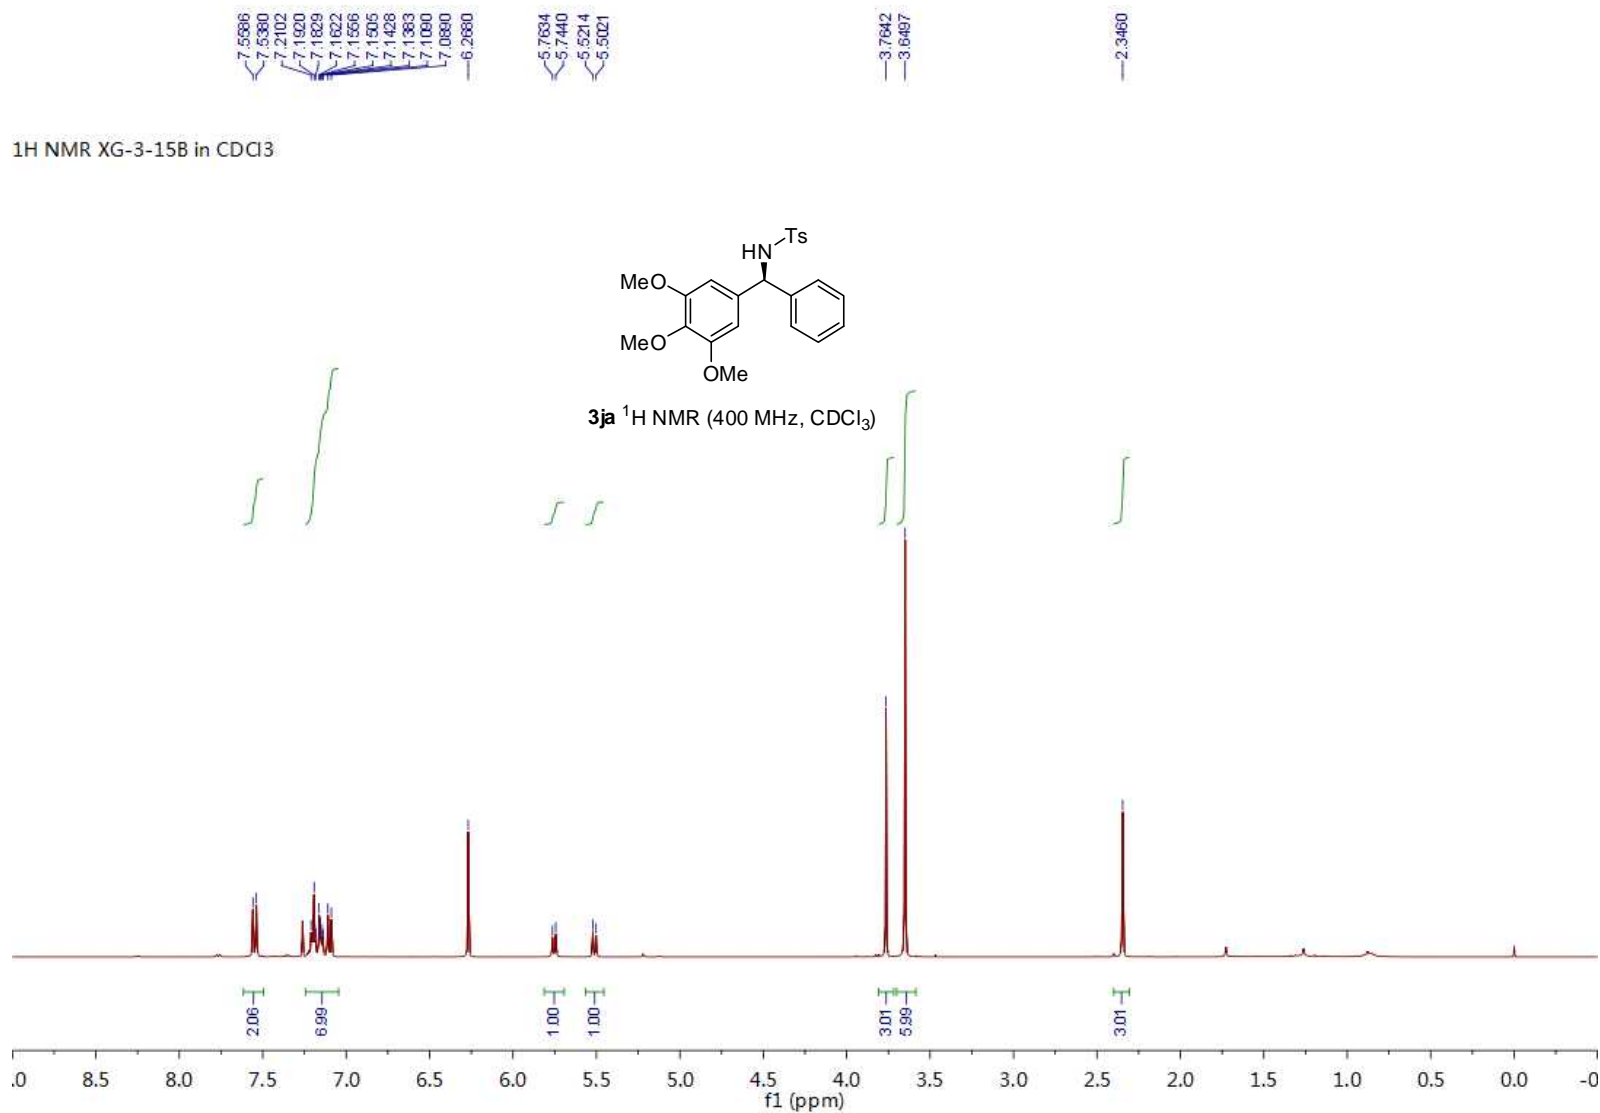



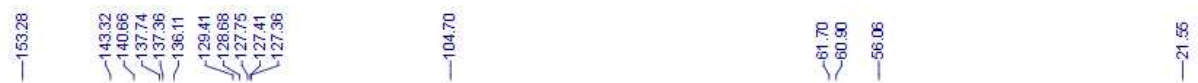

$^{13}\text{C}$  NMR XG-3-15B in  $\text{CDCl}_3$

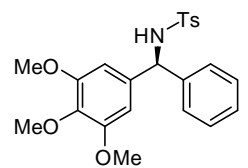

**3ja**  $^{13}\text{C}$  NMR (100 MHz,  $\text{CDCl}_3$ )

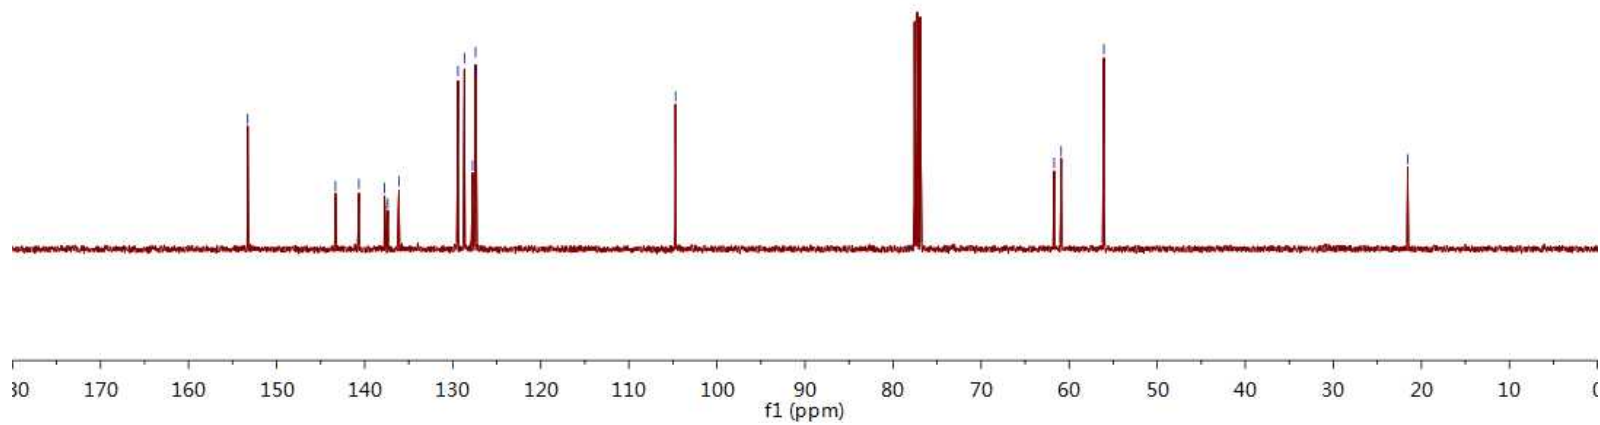

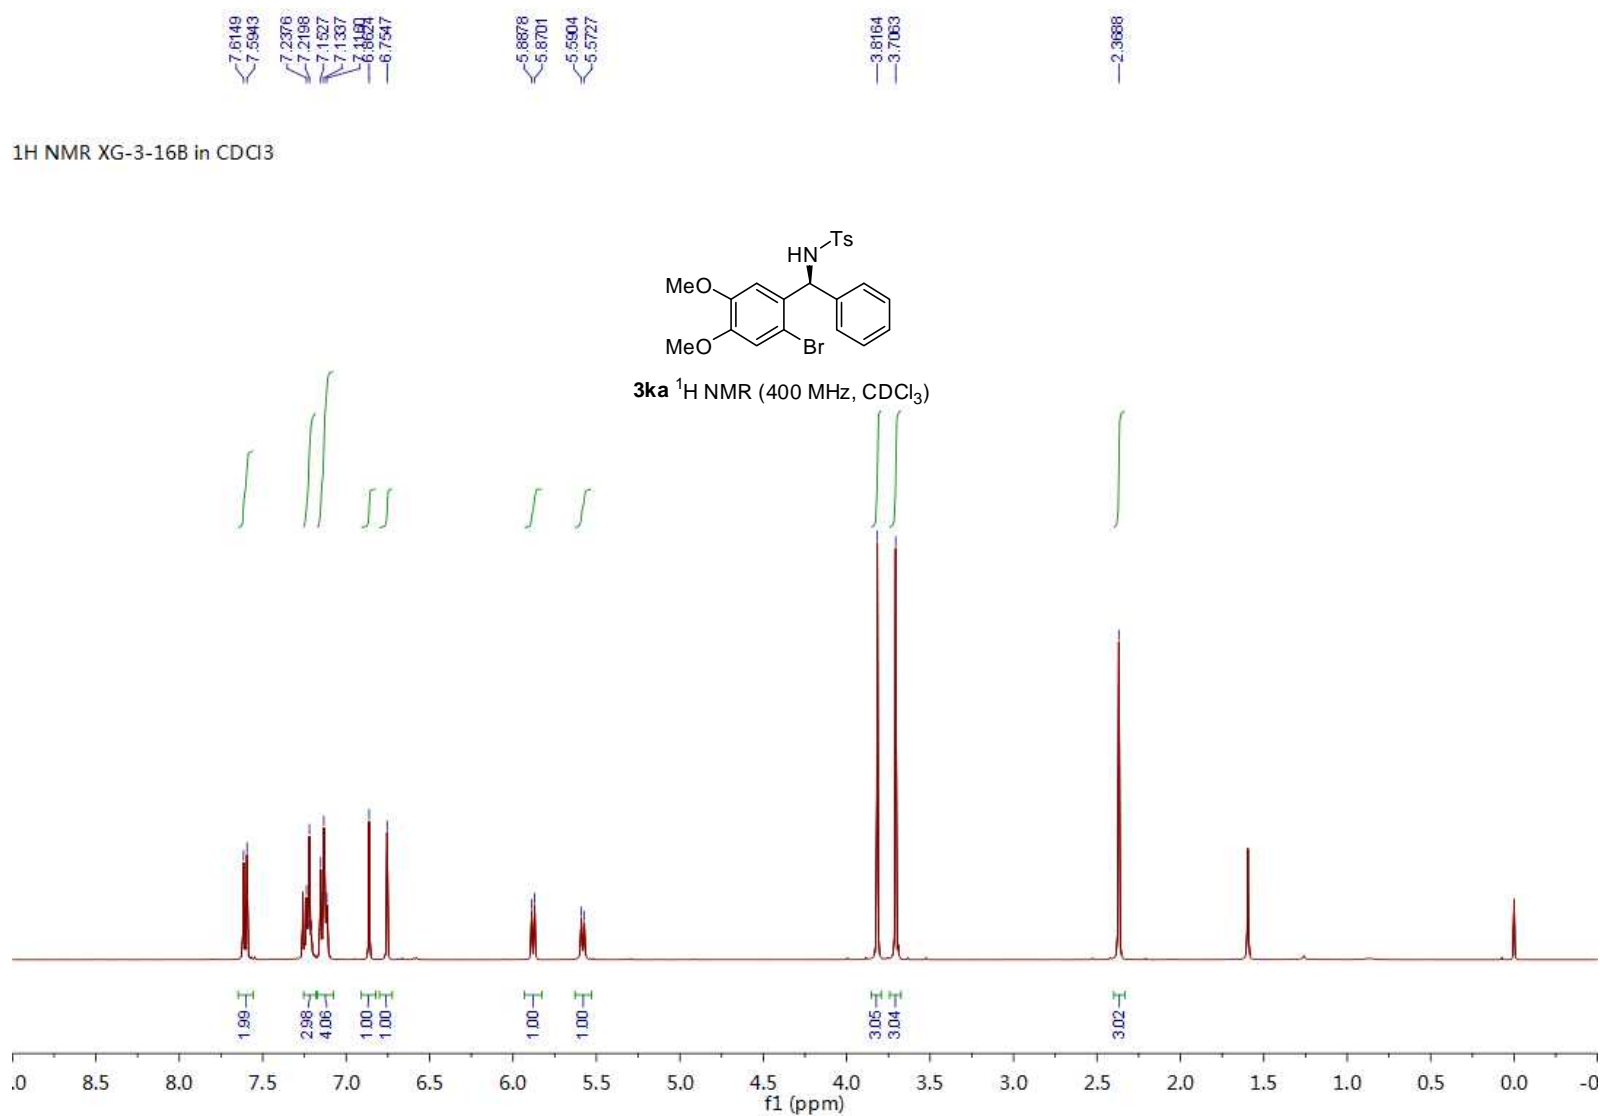

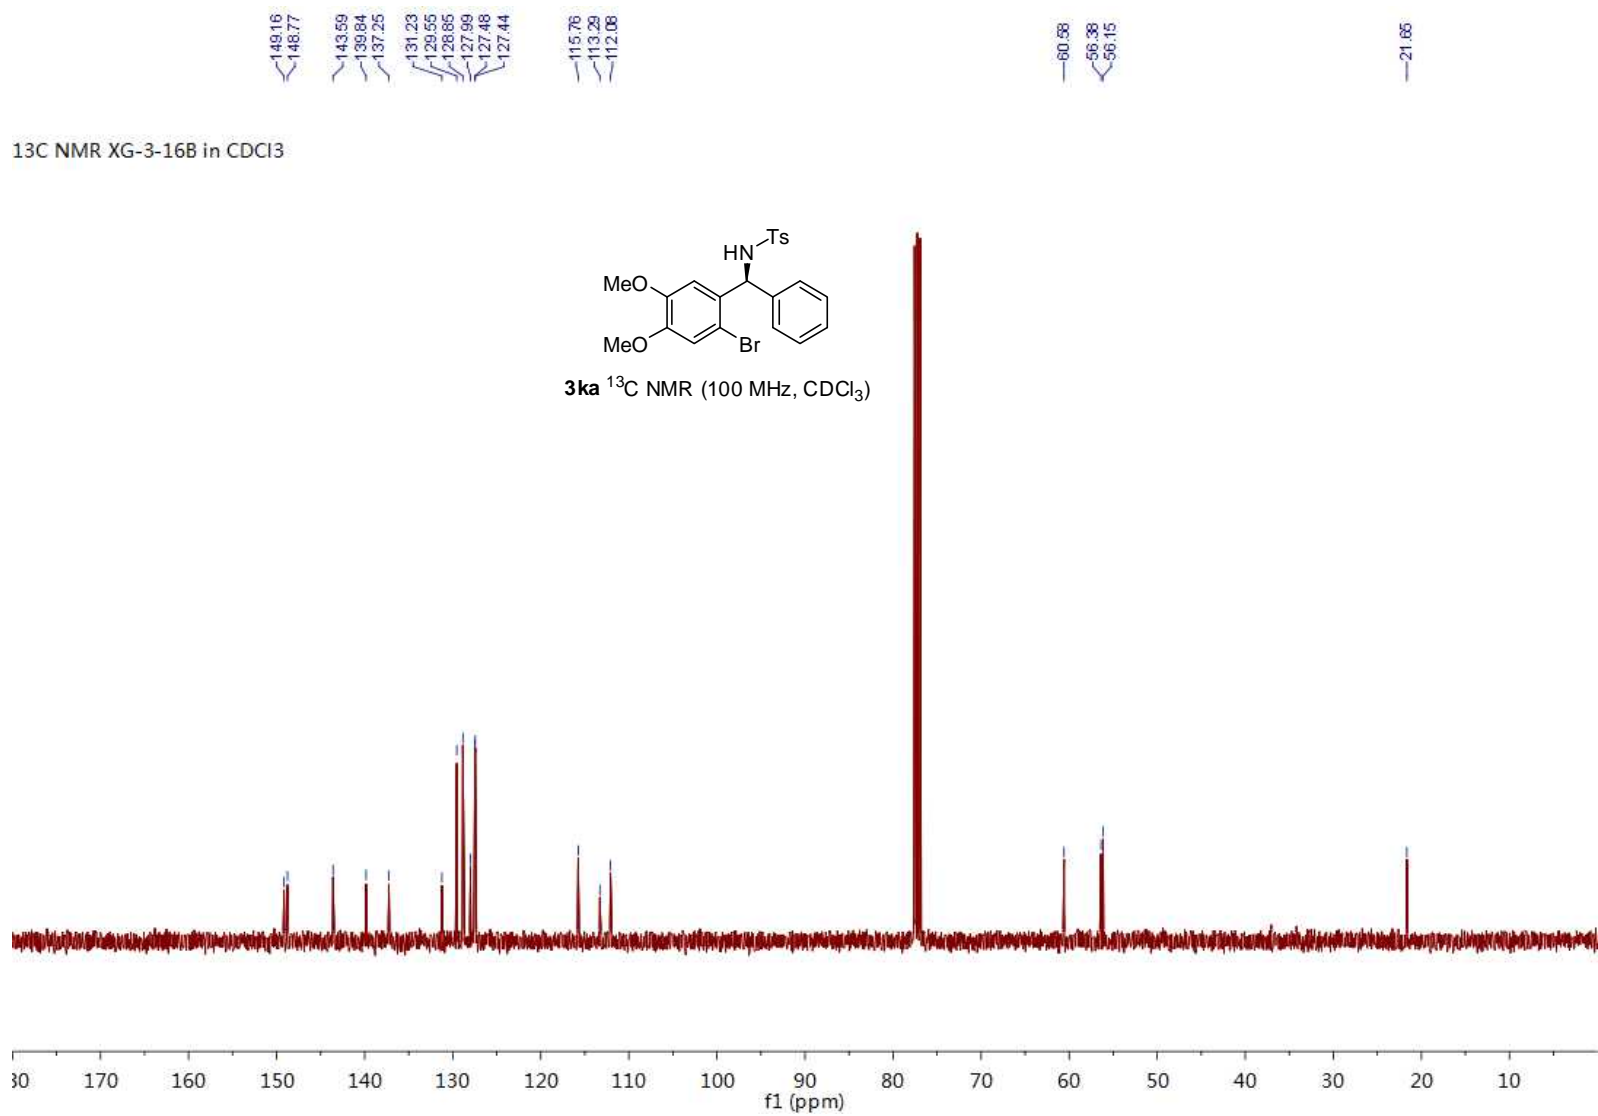

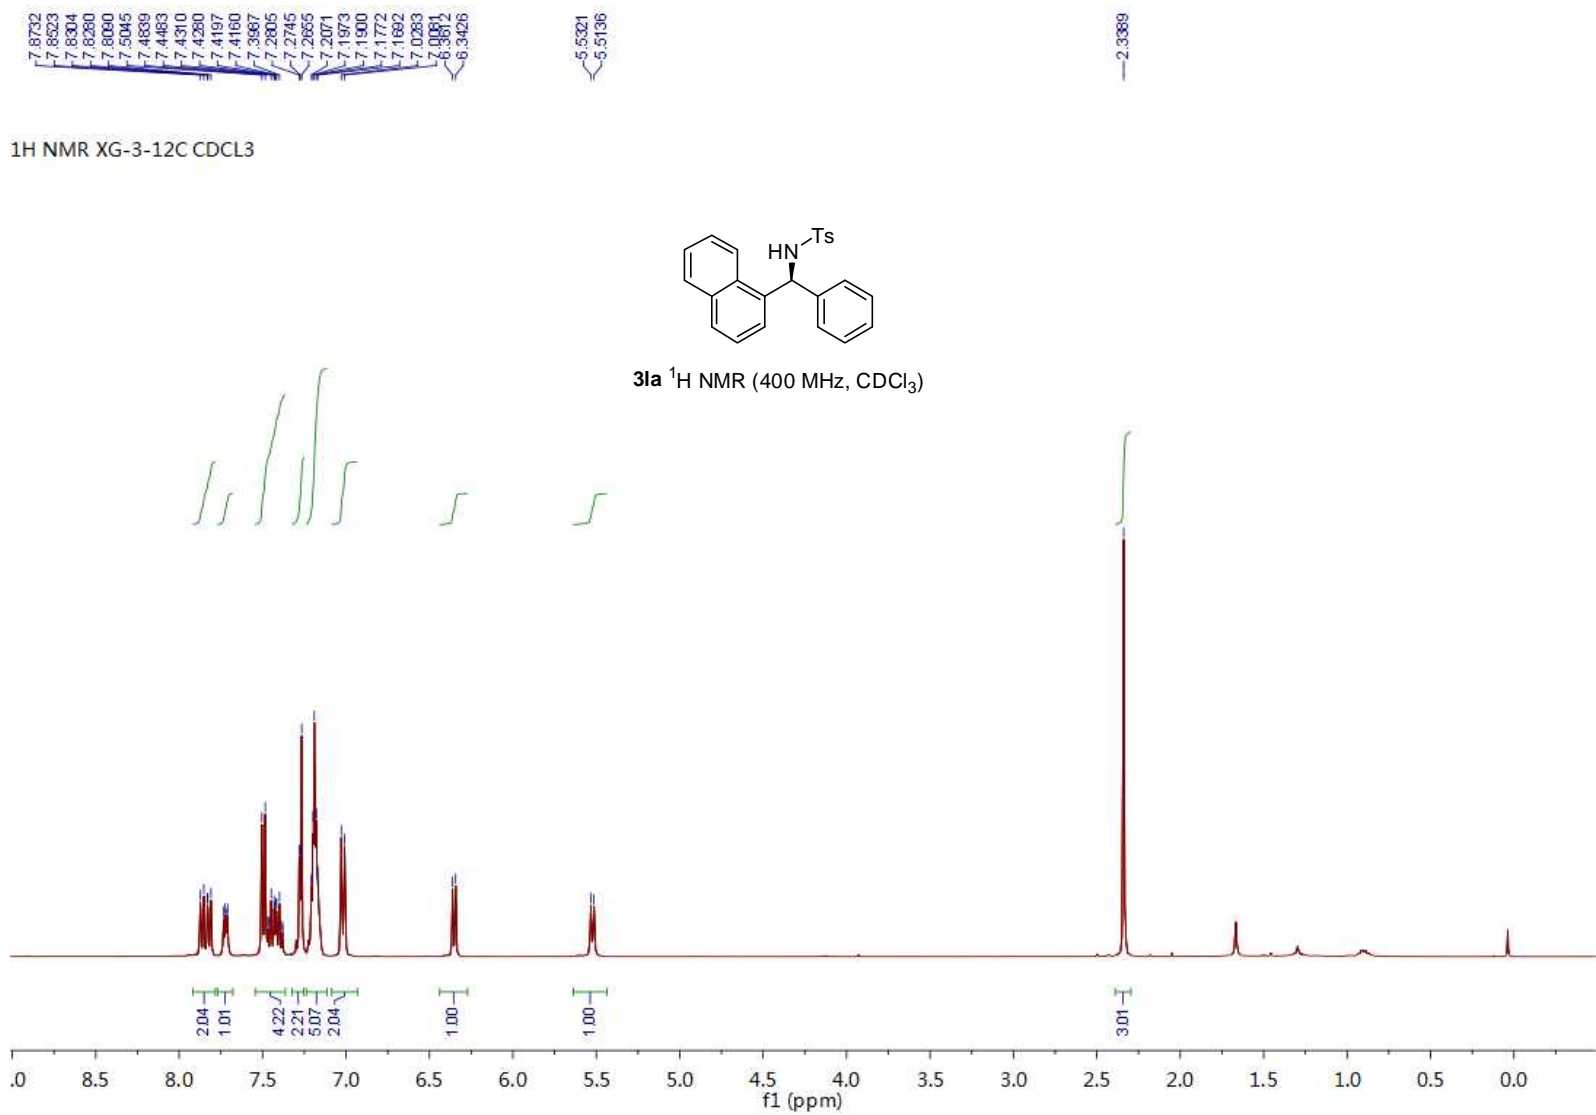

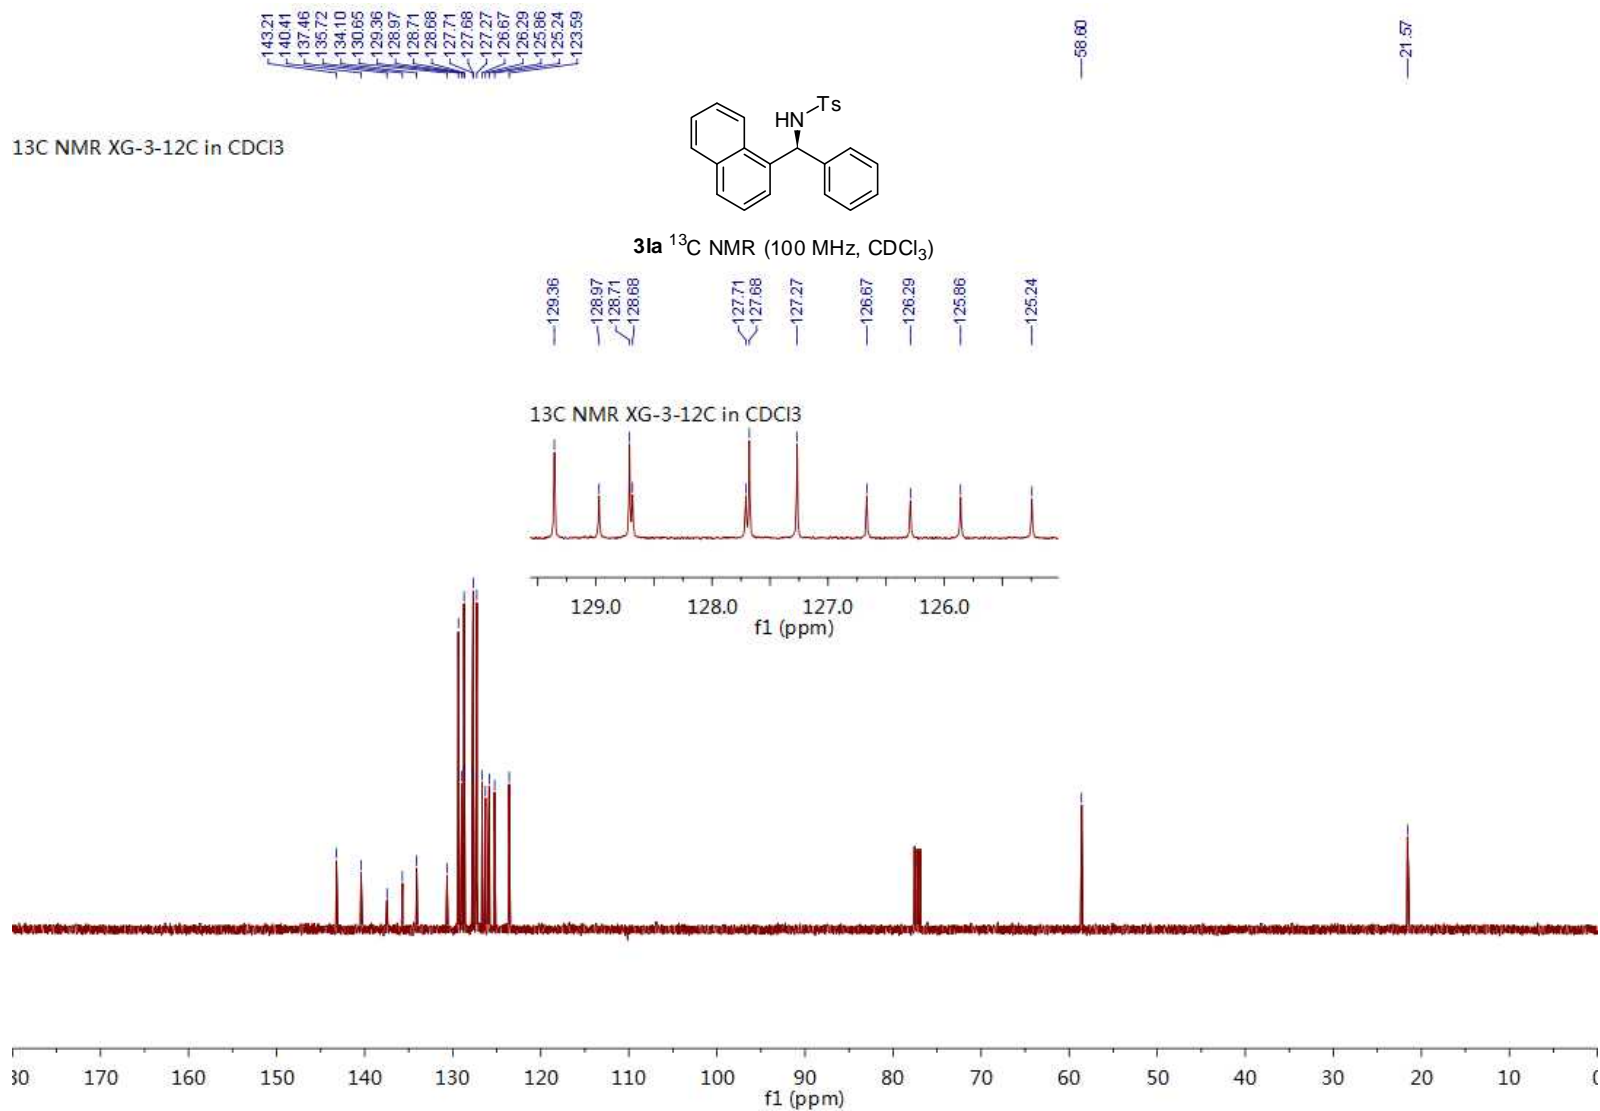

<sup>1</sup>H NMR XG-3-18A in CDCl<sub>3</sub>

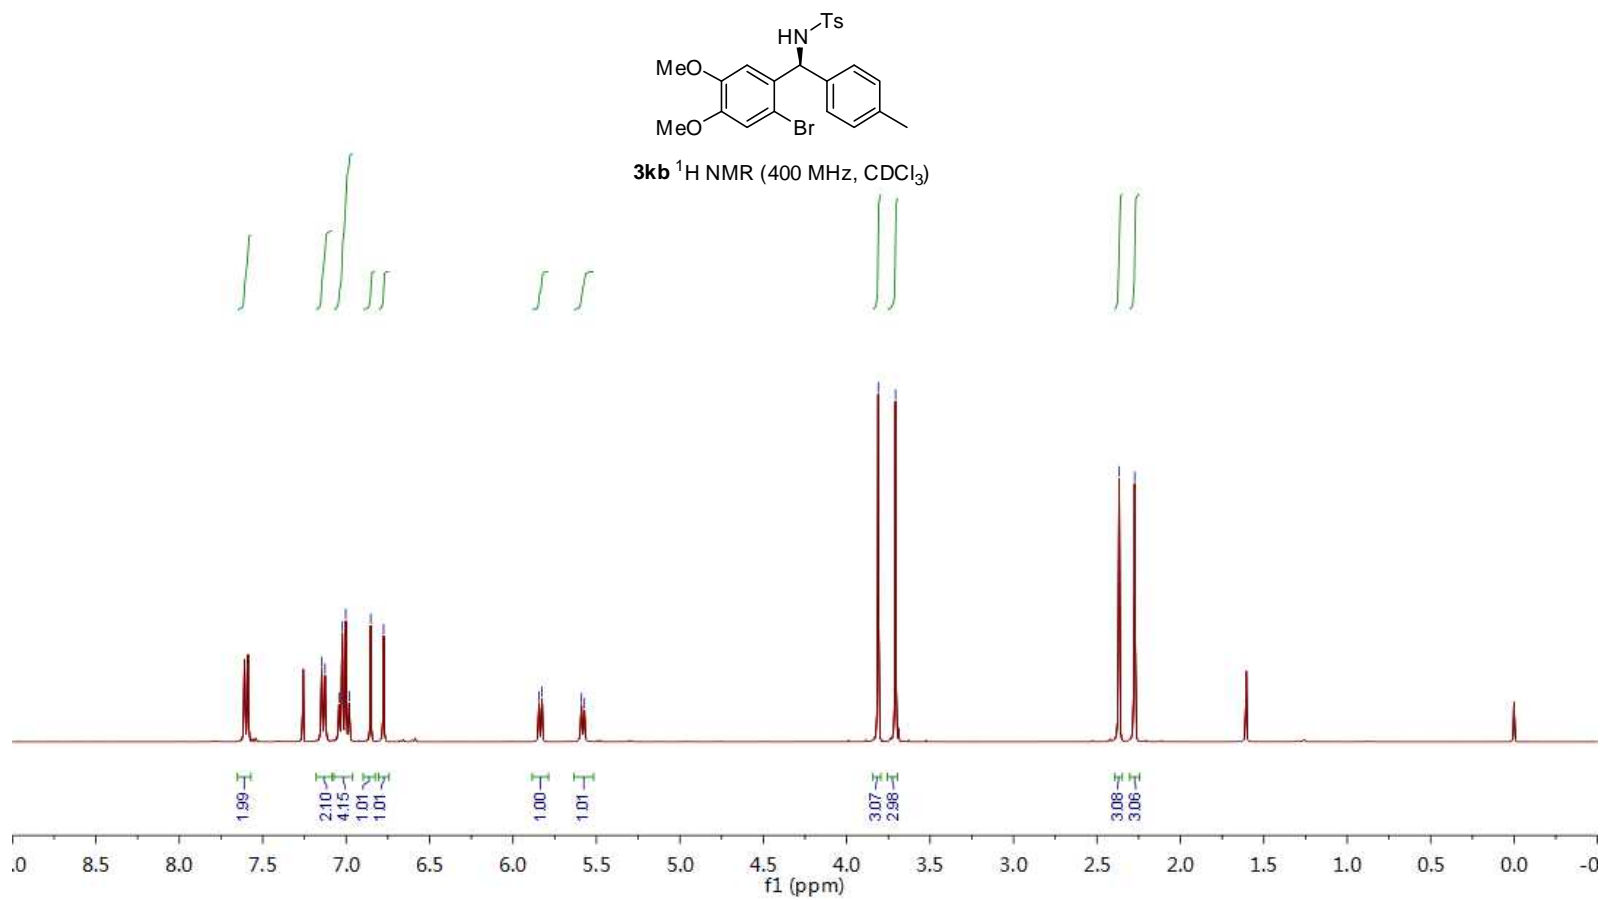

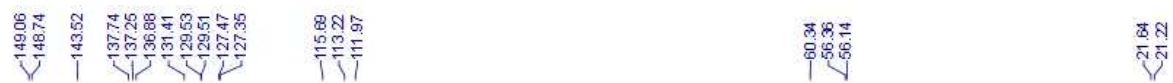

<sup>13</sup>C NMR XG-3-18A in CDCl<sub>3</sub>

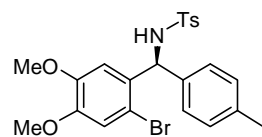

**3kb** <sup>13</sup>C NMR (100 MHz, CDCl<sub>3</sub>)

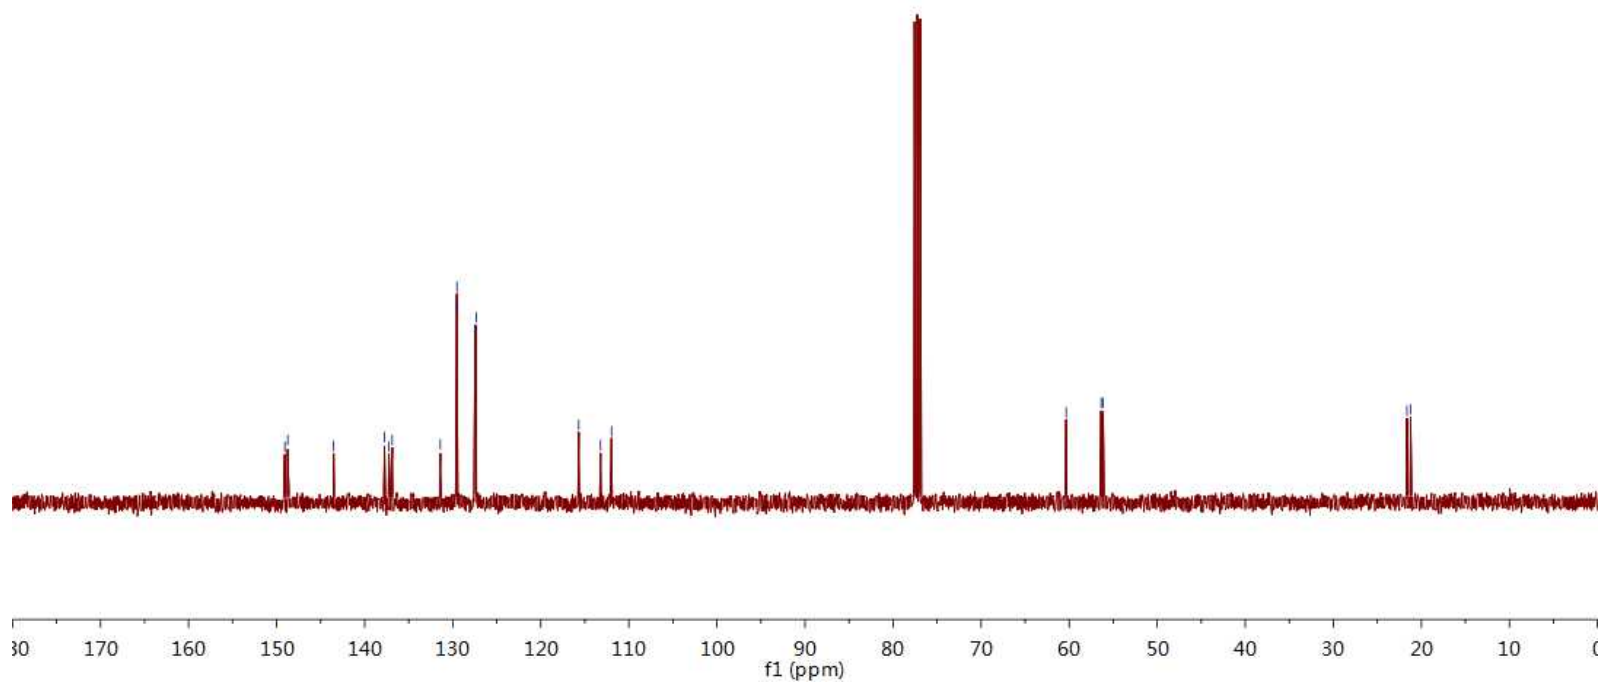

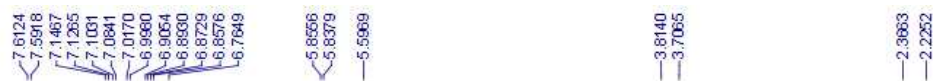

<sup>1</sup>H NMR XG-3-19E in CDCl<sub>3</sub>

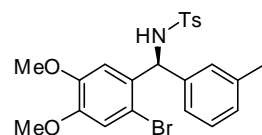

**3kc** <sup>1</sup>H NMR (400 MHz, CDCl<sub>3</sub>)

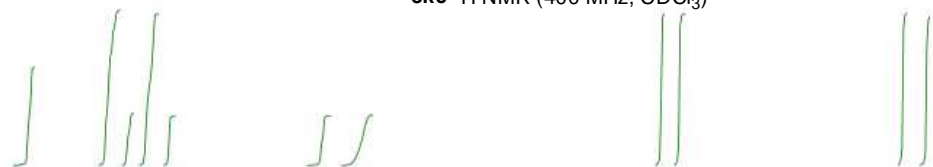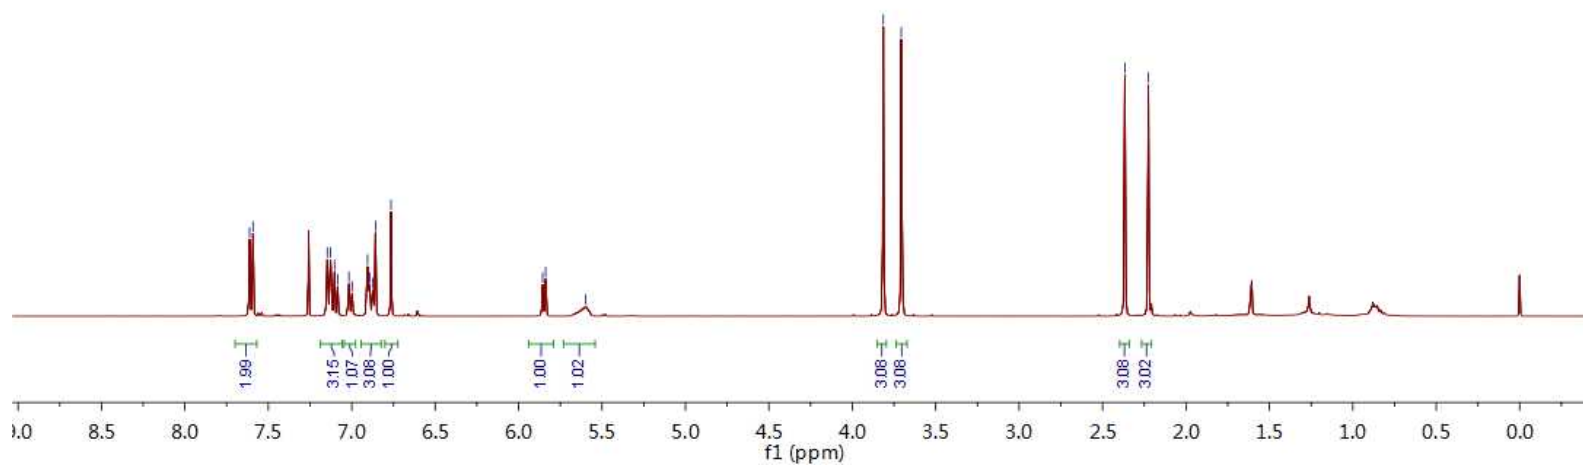



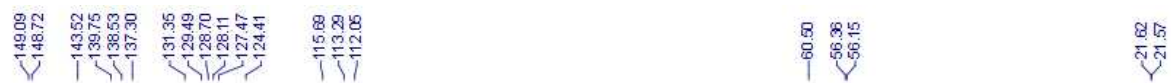

<sup>13</sup>C NMR XG-3-19E in CDCl<sub>3</sub>

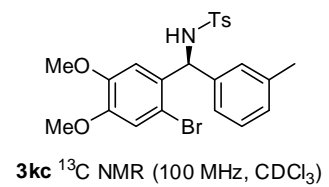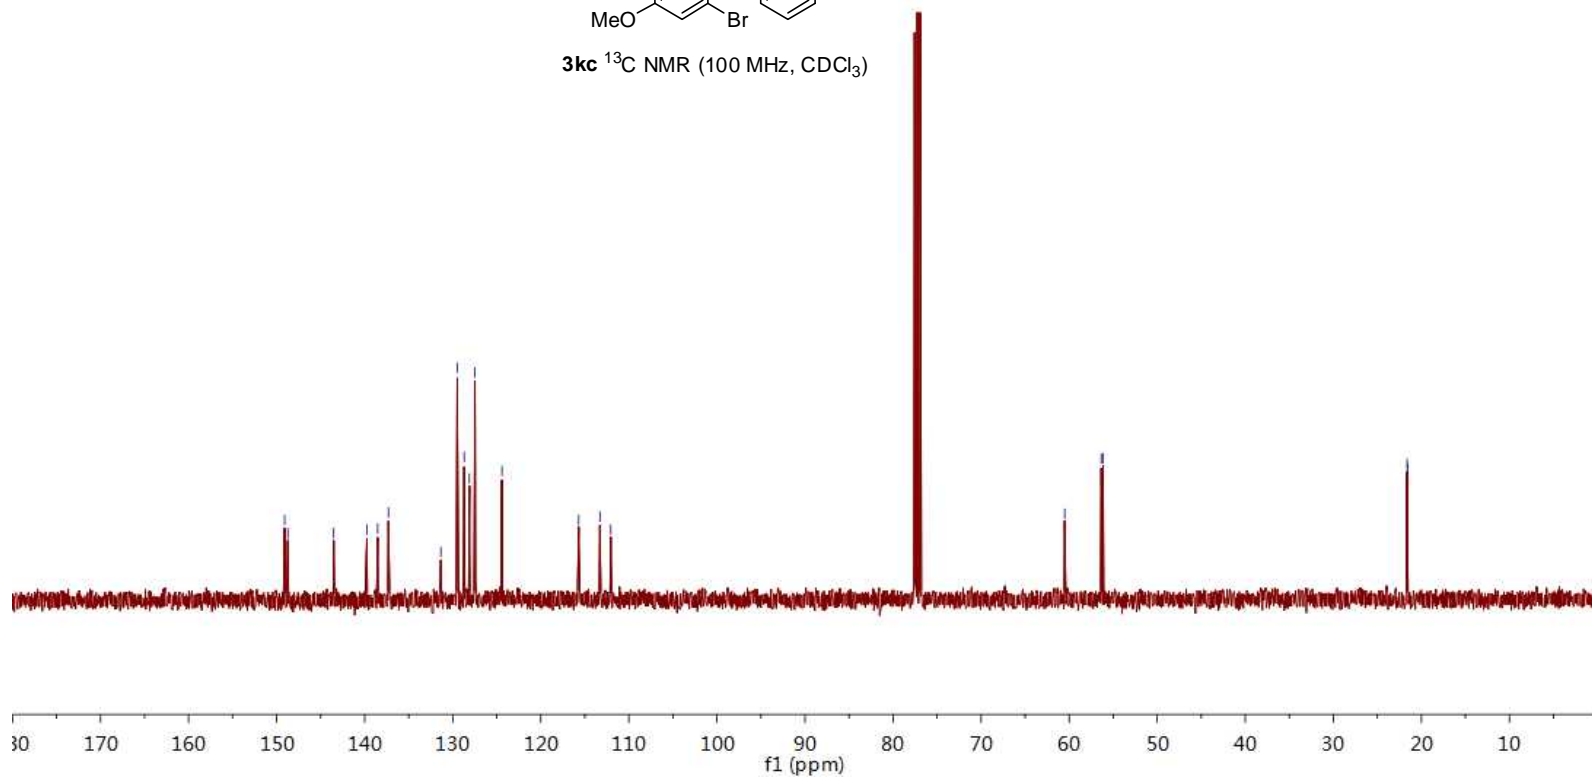

<sup>1</sup>H NMR XG-3-19F in CDCl<sub>3</sub>

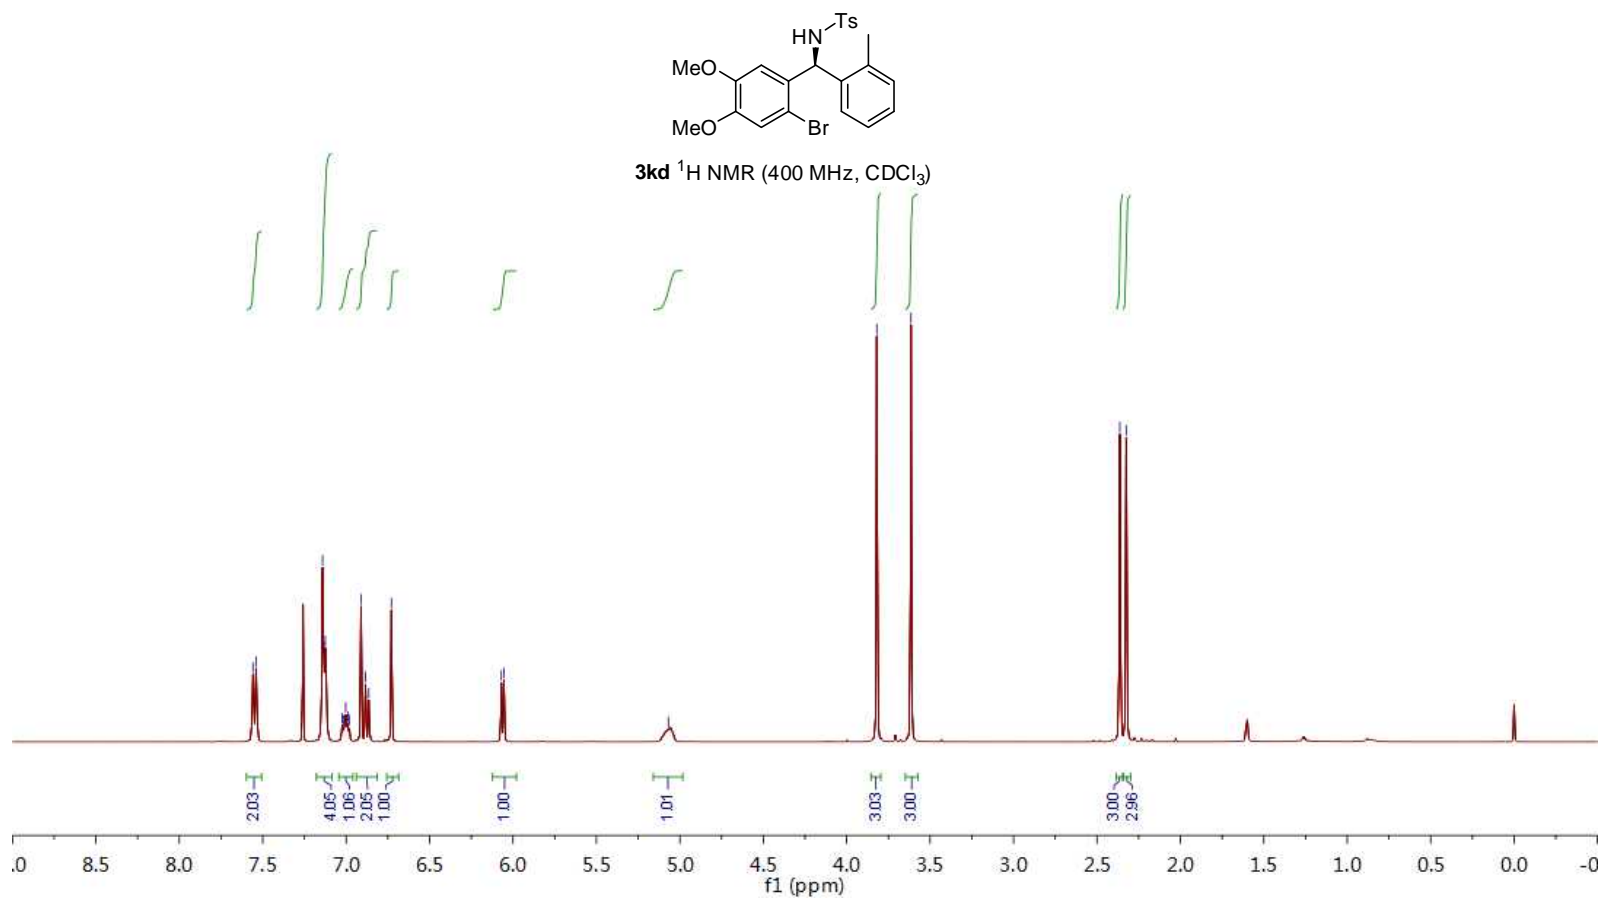

149.02  
148.37  
143.59  
137.59  
137.57  
136.95  
131.05  
130.80  
129.51  
128.20  
127.59  
127.43  
126.27  
115.84  
113.90  
112.40

57.82  
56.37  
55.95

21.61  
19.33

$^{13}\text{C}$  NMR XG-3-19F in  $\text{CDCl}_3$

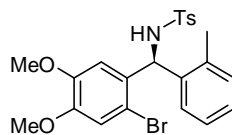

**3kd**  $^{13}\text{C}$  NMR (100 MHz,  $\text{CDCl}_3$ )

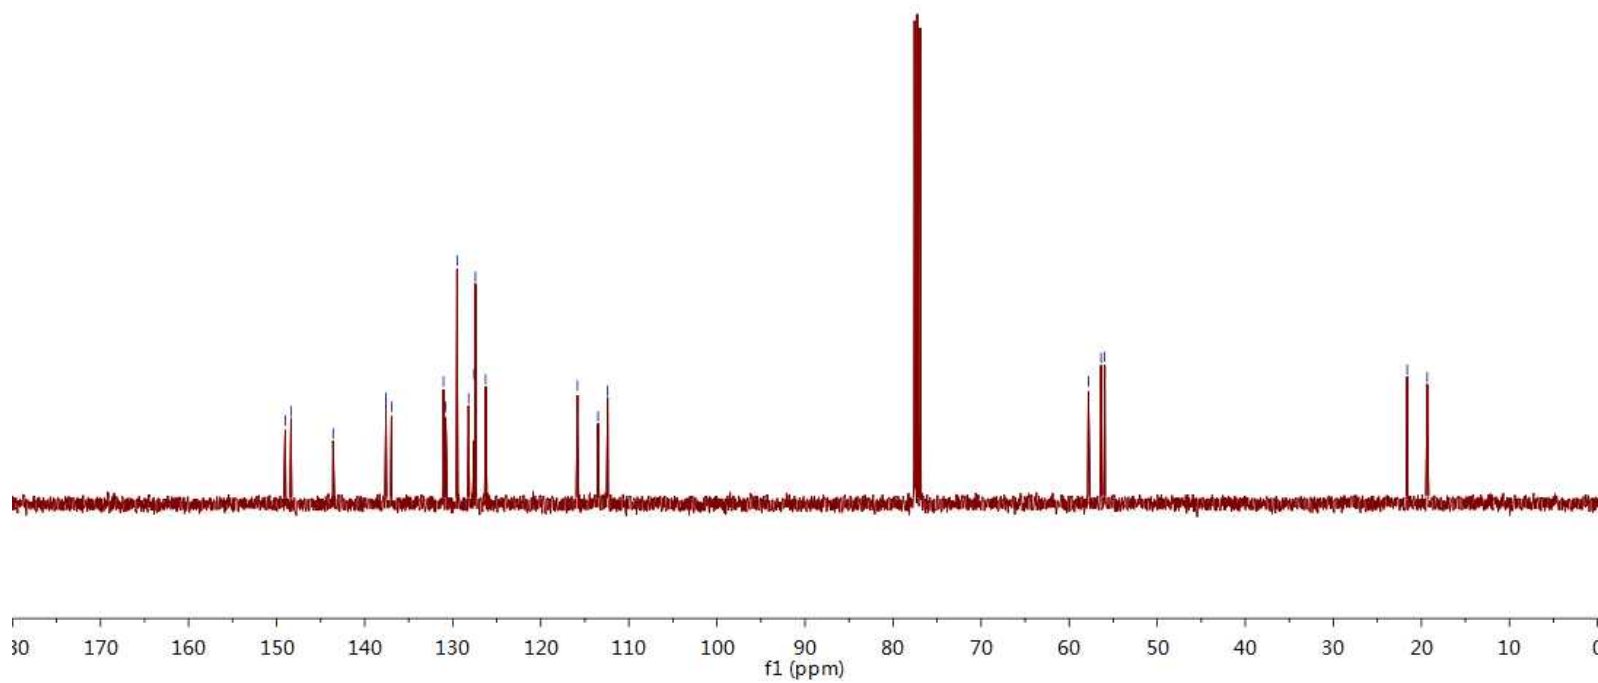

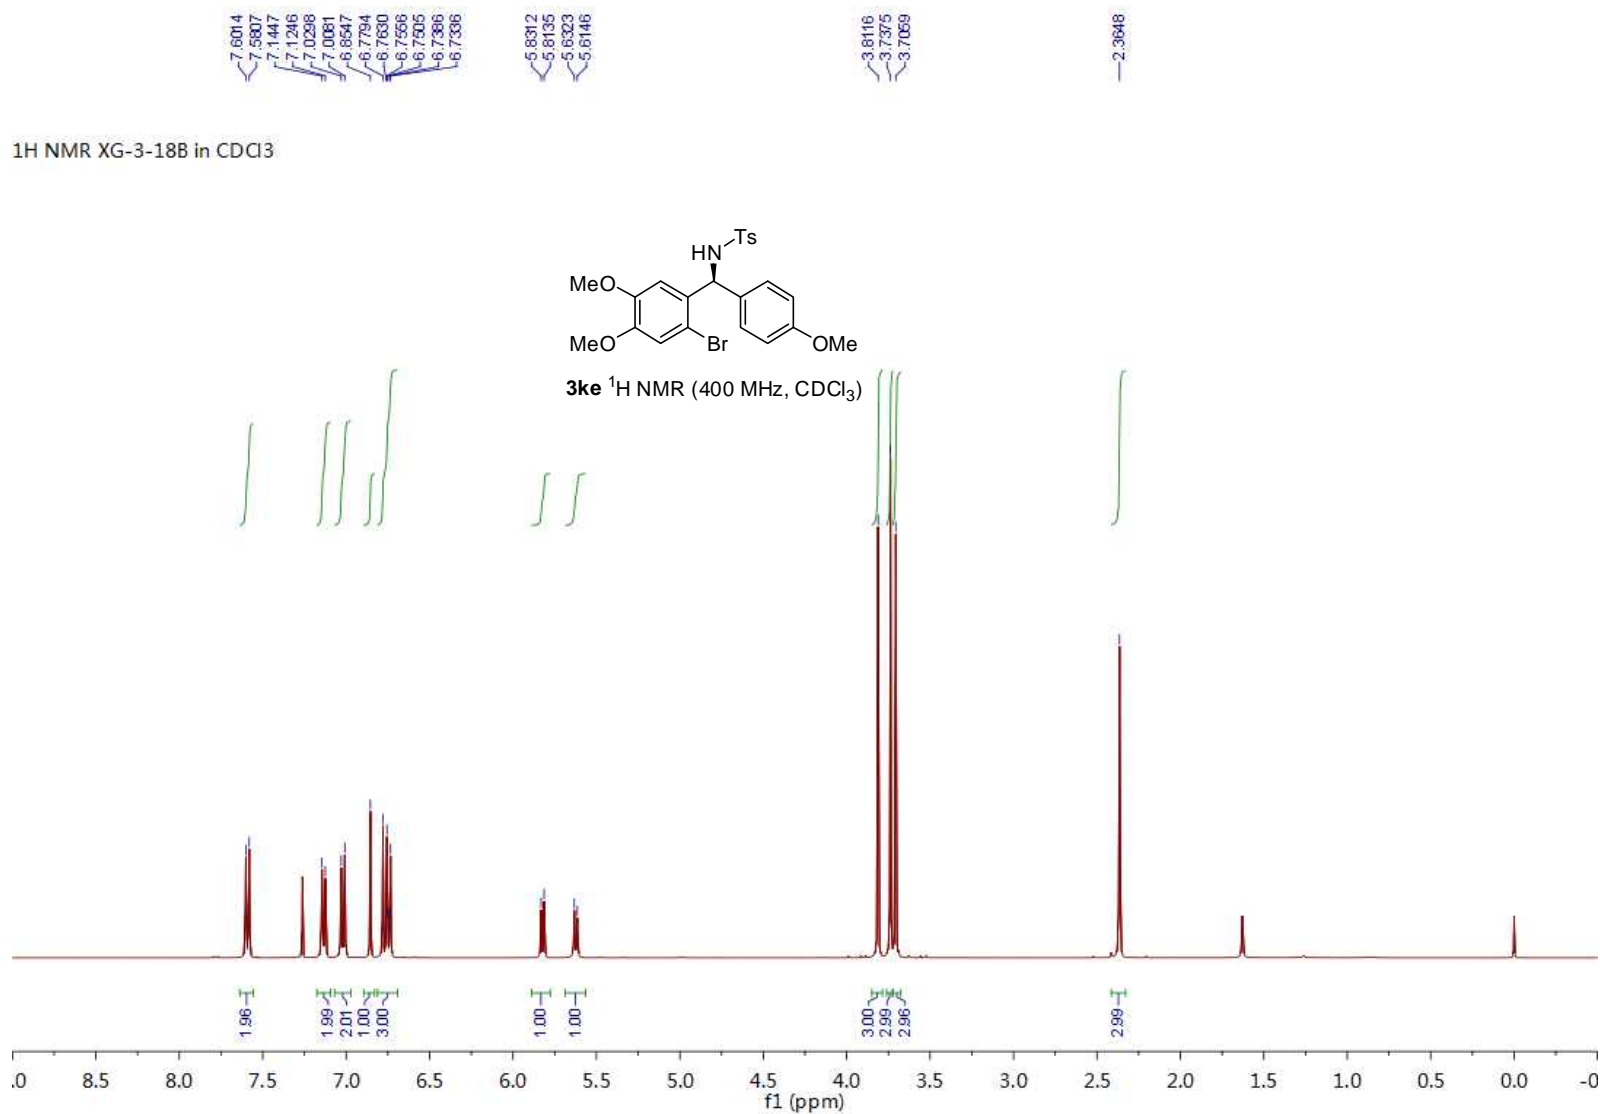

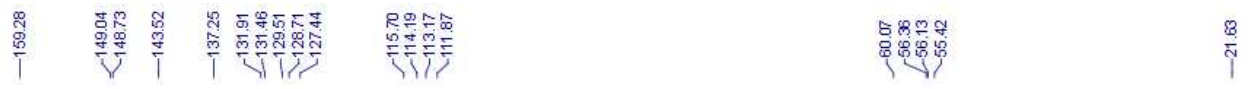

$^{13}\text{C}$  NMR XG-3-18B in  $\text{CDCl}_3$

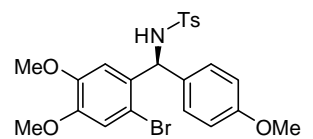

**3ke**  $^{13}\text{C}$  NMR (100 MHz,  $\text{CDCl}_3$ )

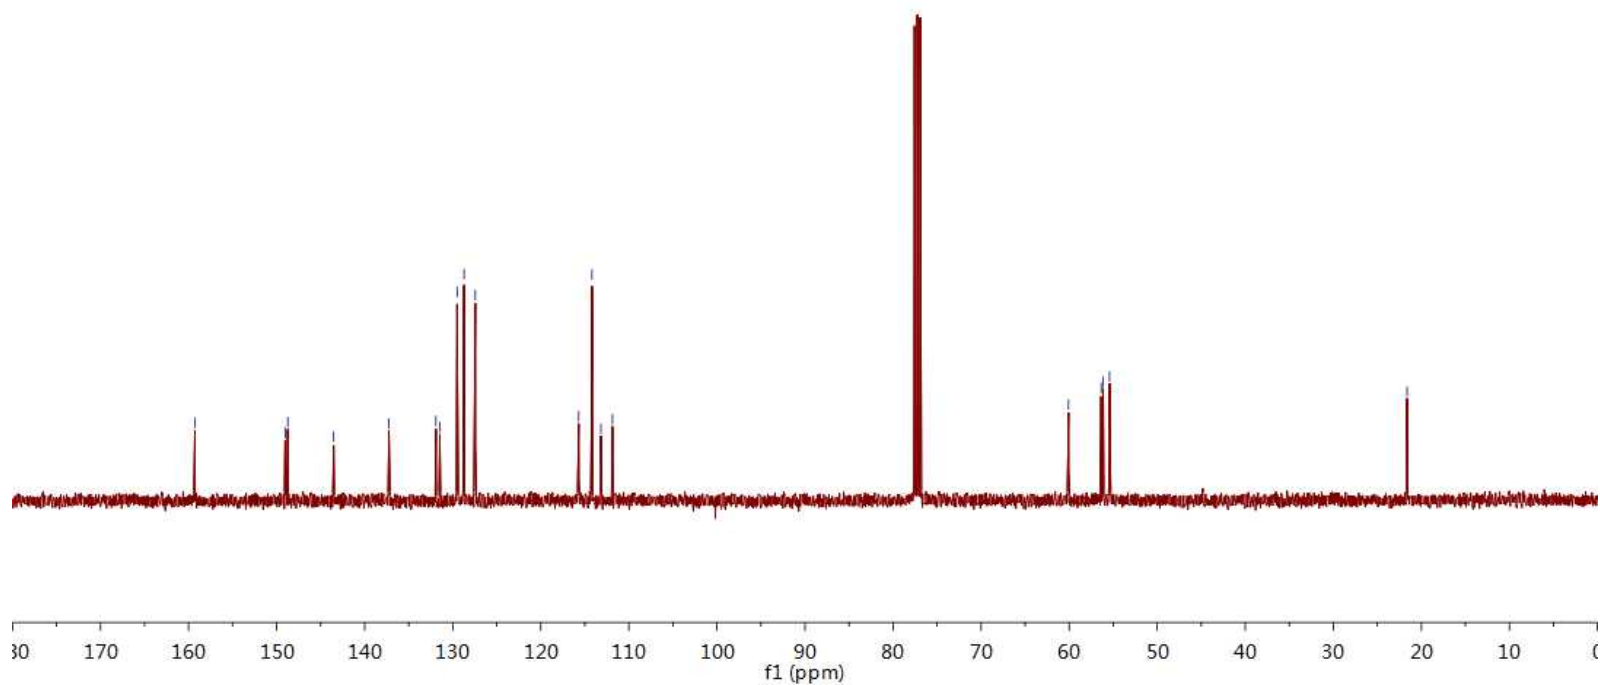

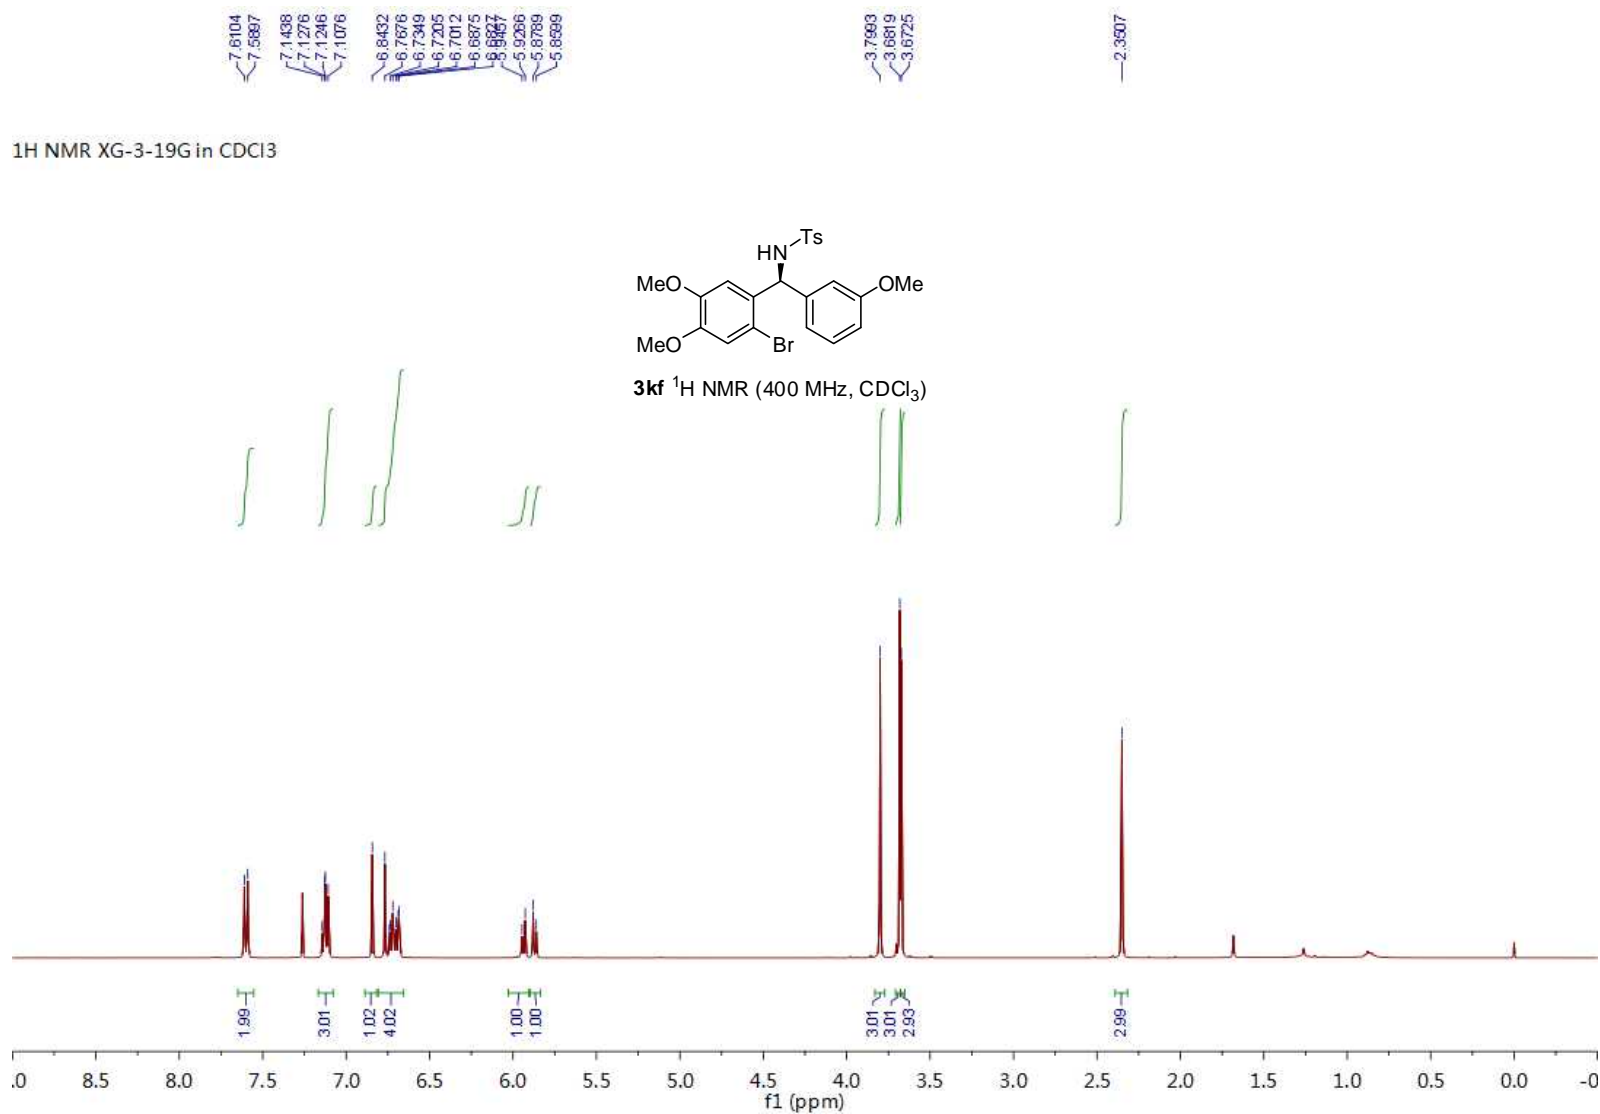

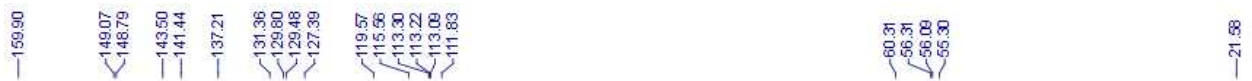

$^{13}\text{C}$  NMR XG-3-19G in  $\text{CDCl}_3$

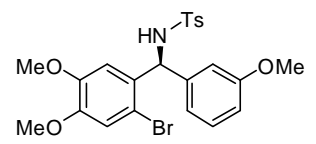

**3kf**  $^{13}\text{C}$  NMR (100 MHz,  $\text{CDCl}_3$ )

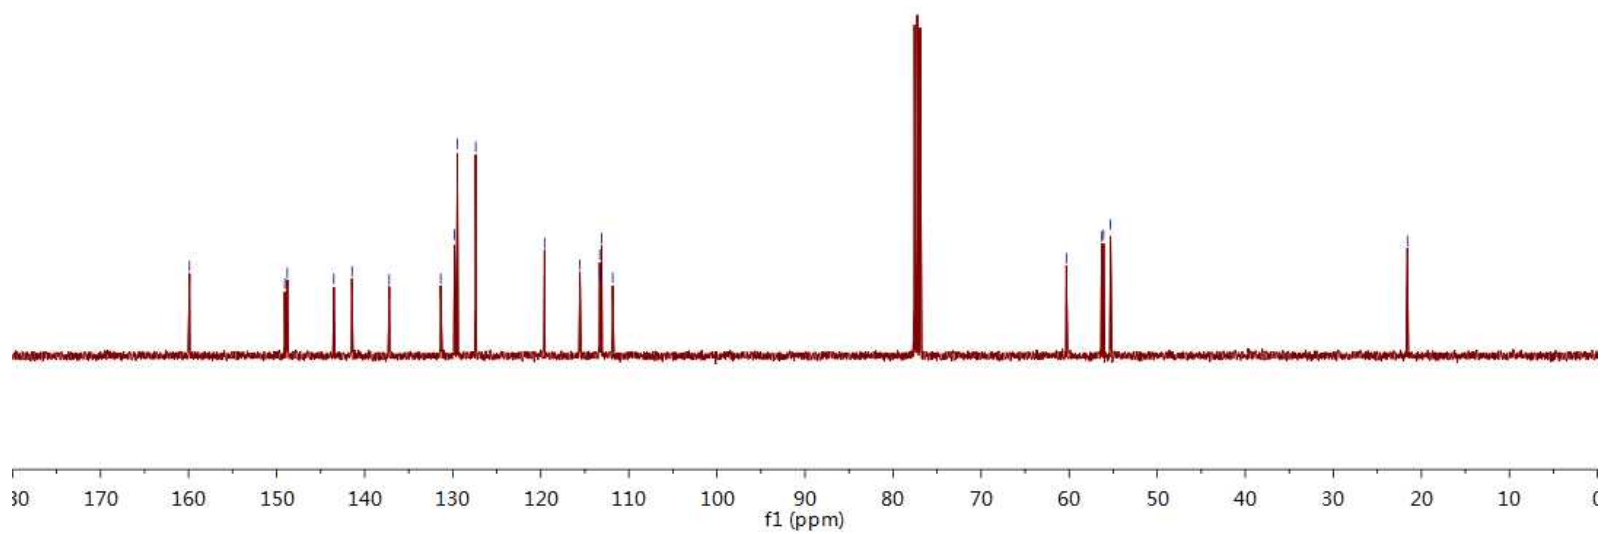

7.6403  
7.6197  
7.1700  
7.1562  
7.1356  
7.0640  
7.0439  
7.0401  
7.0248  
7.0210  
6.8869  
6.7749  
6.7397  
6.7193  
6.6066  
5.6530  
5.6366  
3.8105  
3.7402  
3.6326  
2.3648

<sup>1</sup>H NMR XG-3-20H in CDCl<sub>3</sub>

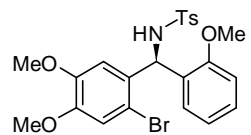

**3kg** <sup>1</sup>H NMR (400 MHz, CDCl<sub>3</sub>)

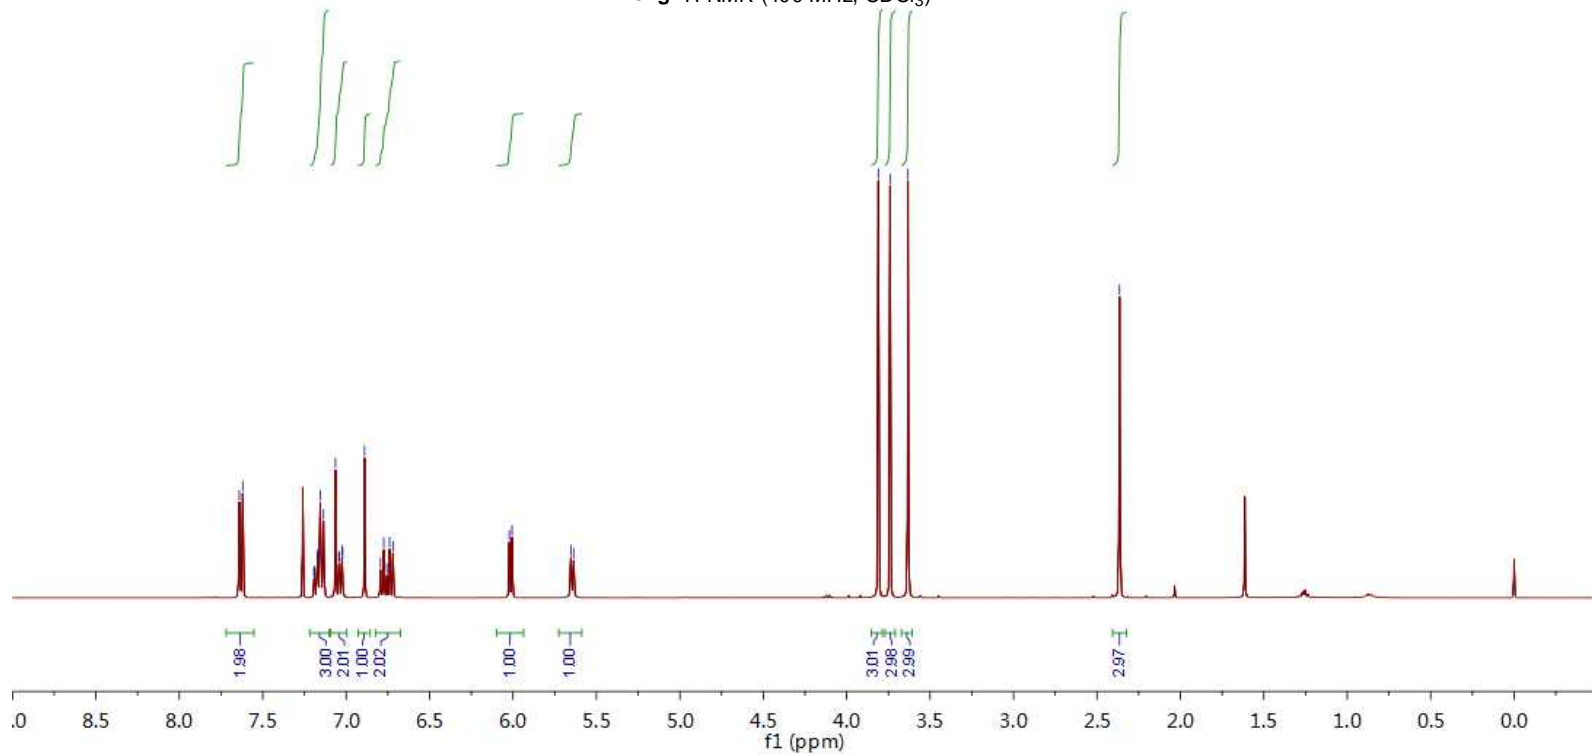



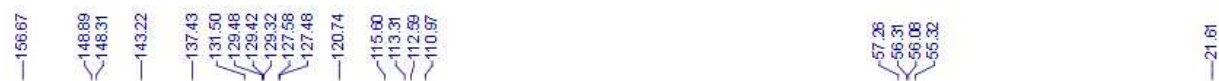

<sup>13</sup>C NMR XG-3-20H in CDCl<sub>3</sub>

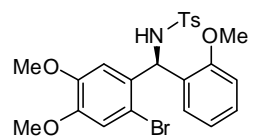

**3kg** <sup>13</sup>C NMR (100 MHz, CDCl<sub>3</sub>)

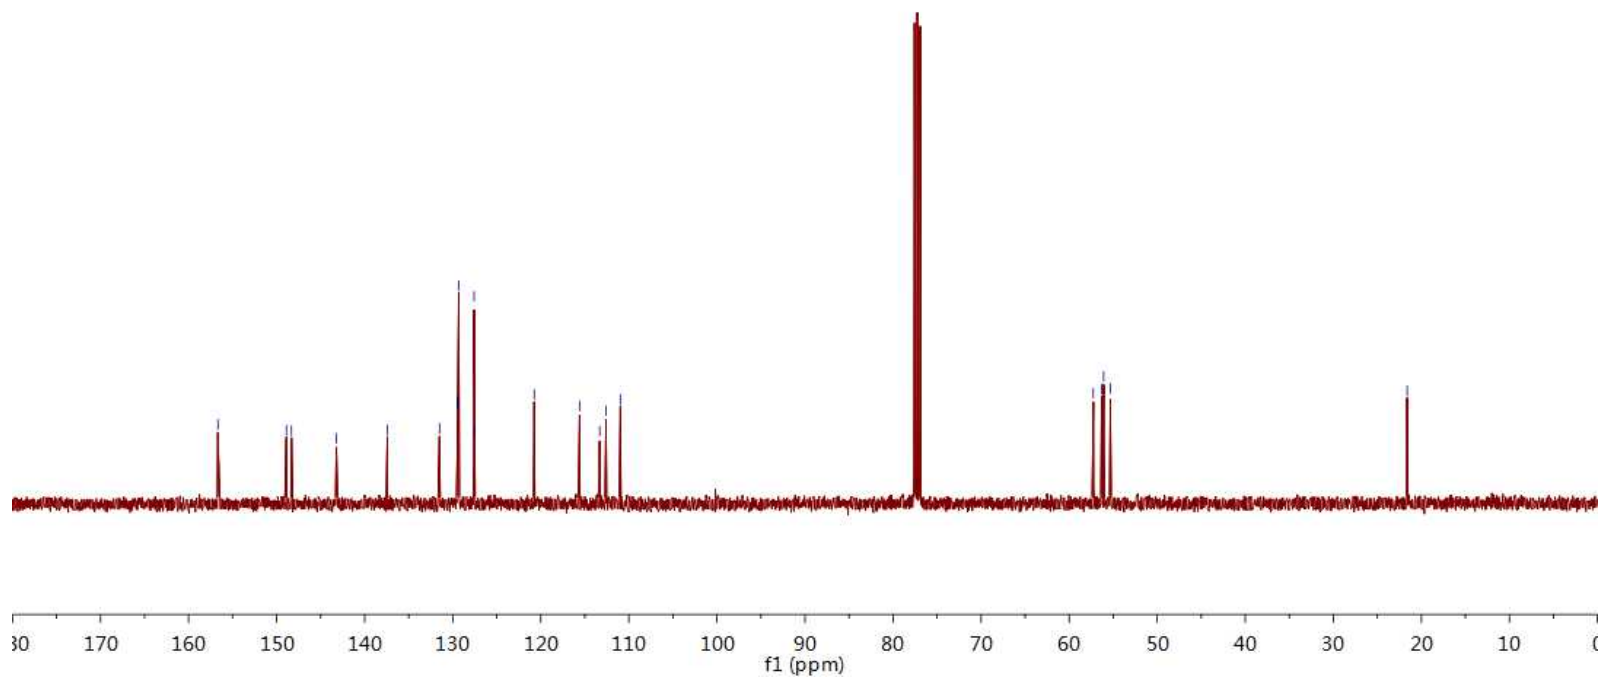

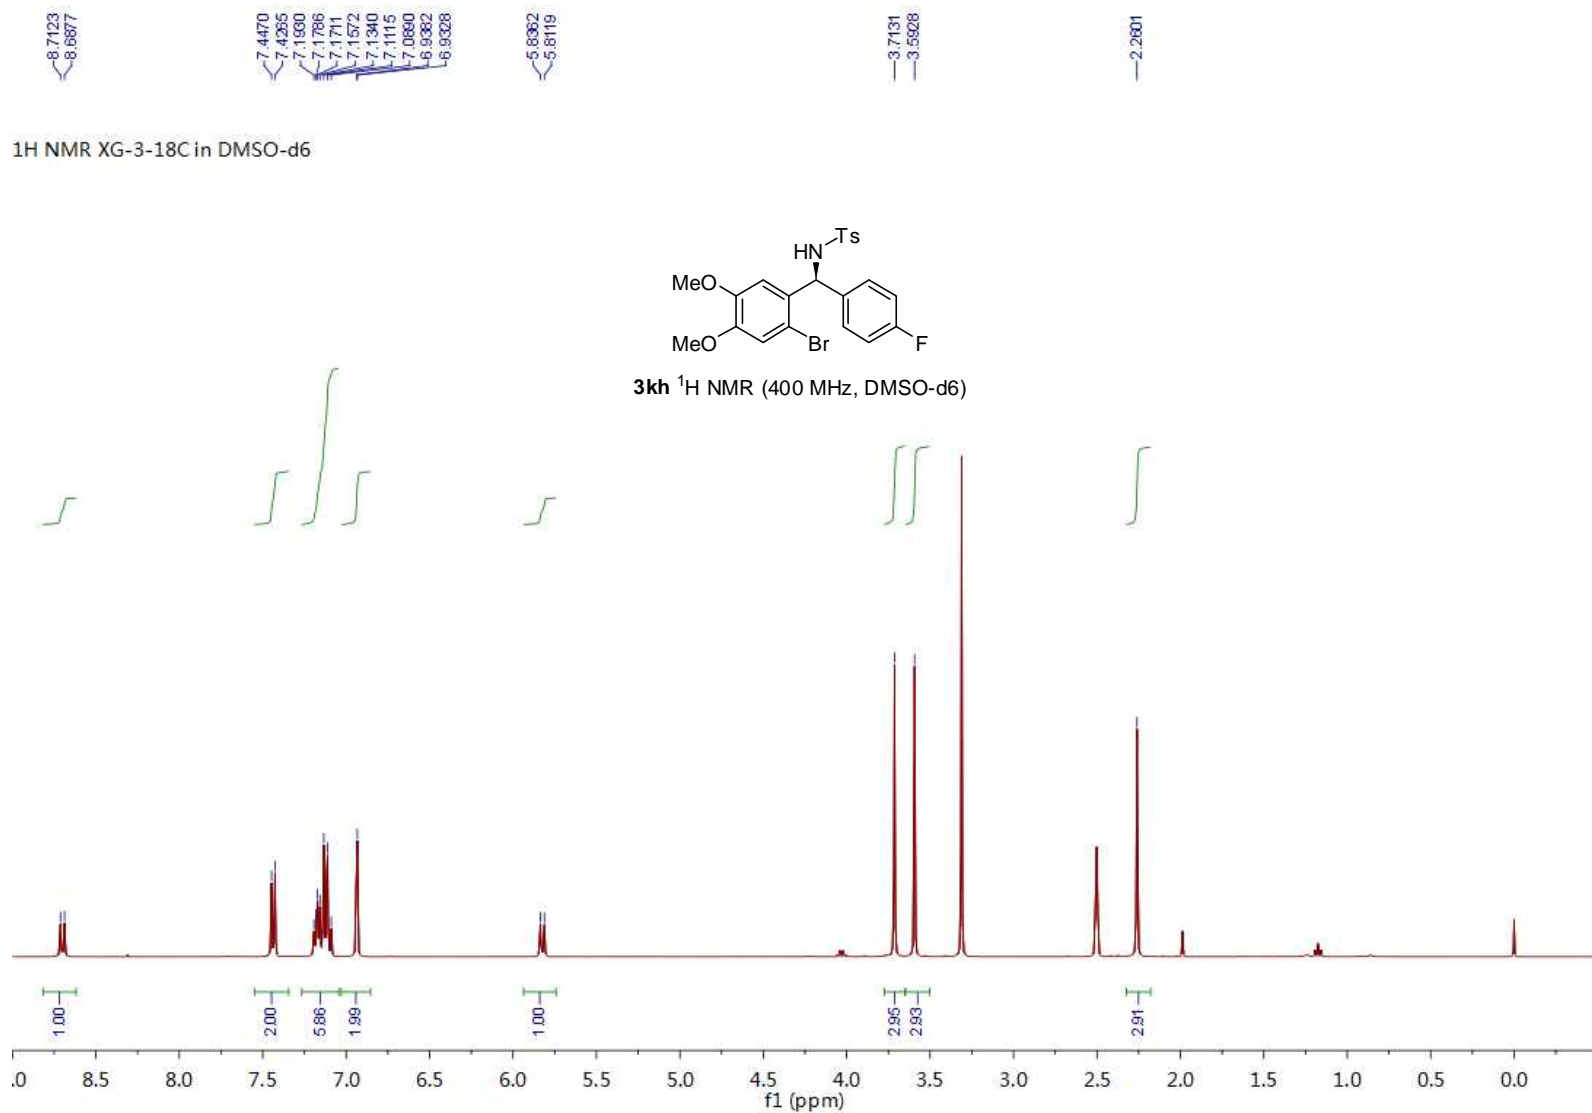

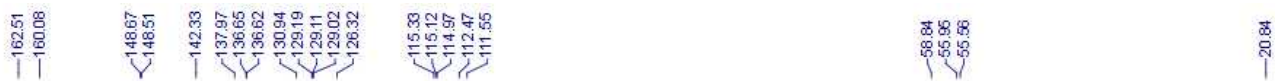

<sup>13</sup>C NMR XG-3-18C in DMSO

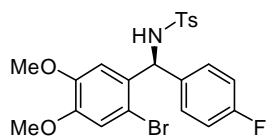

**3kh** <sup>13</sup>C NMR (100 MHz, DMSO-d<sub>6</sub>)

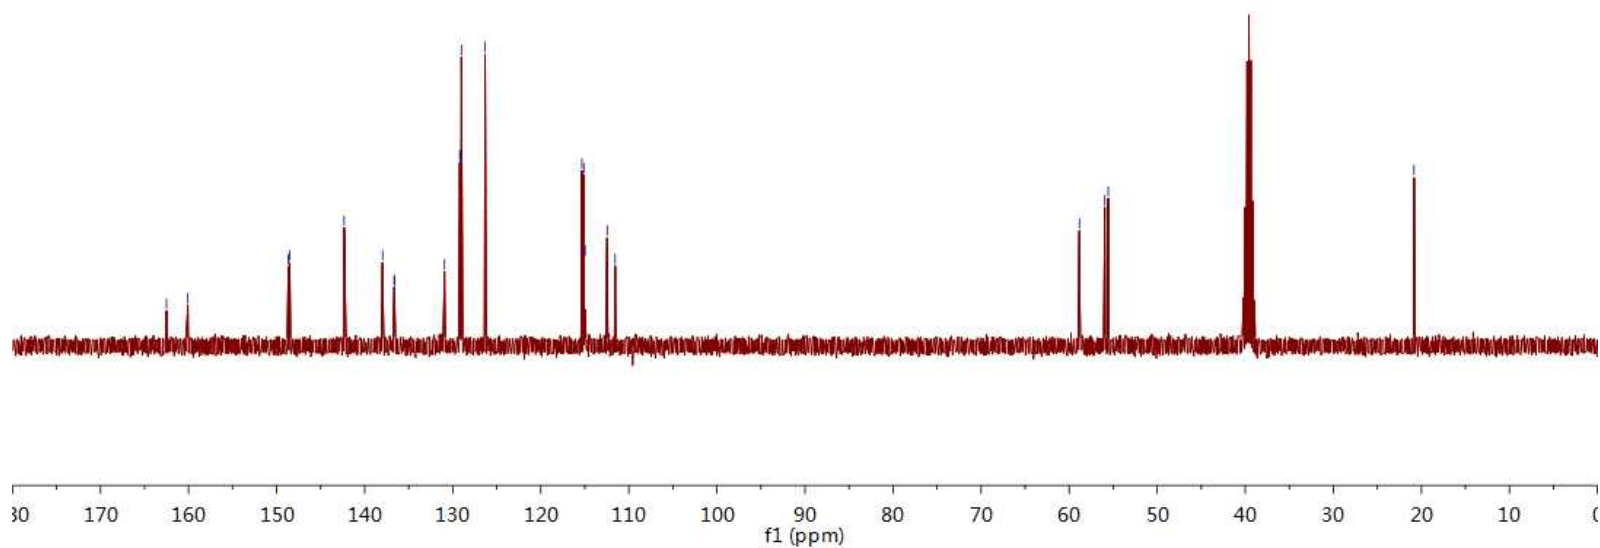

<sup>19</sup>F NMR XG-3-18C in DMSO-d6

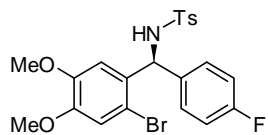

**3kh** <sup>19</sup>F NMR (376 MHz, DMSO-d6)

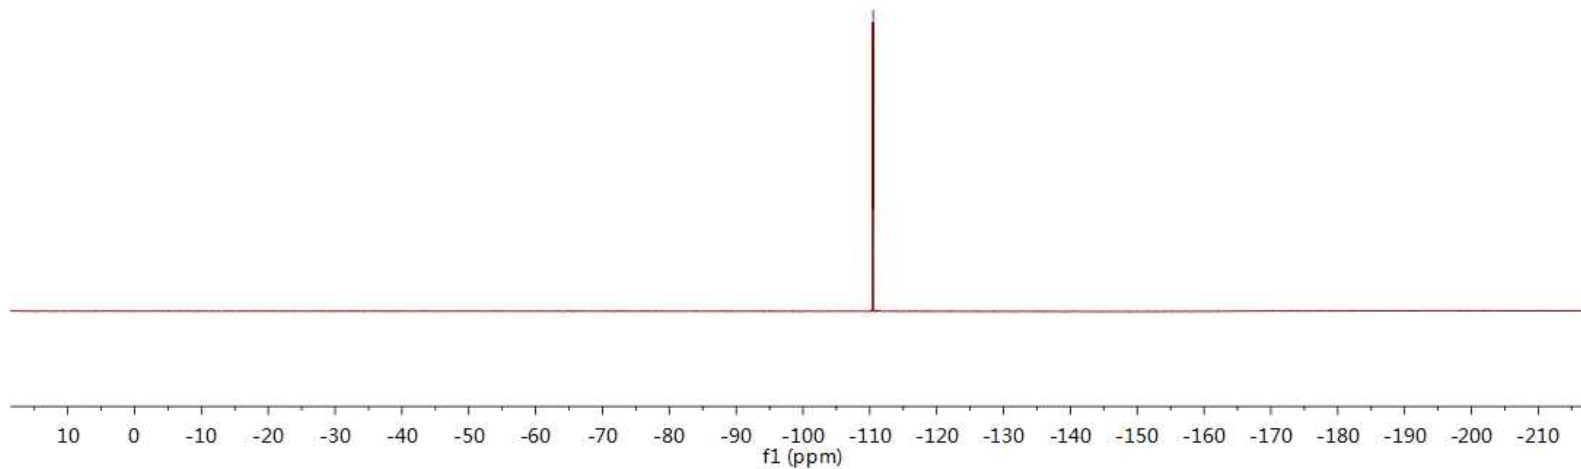

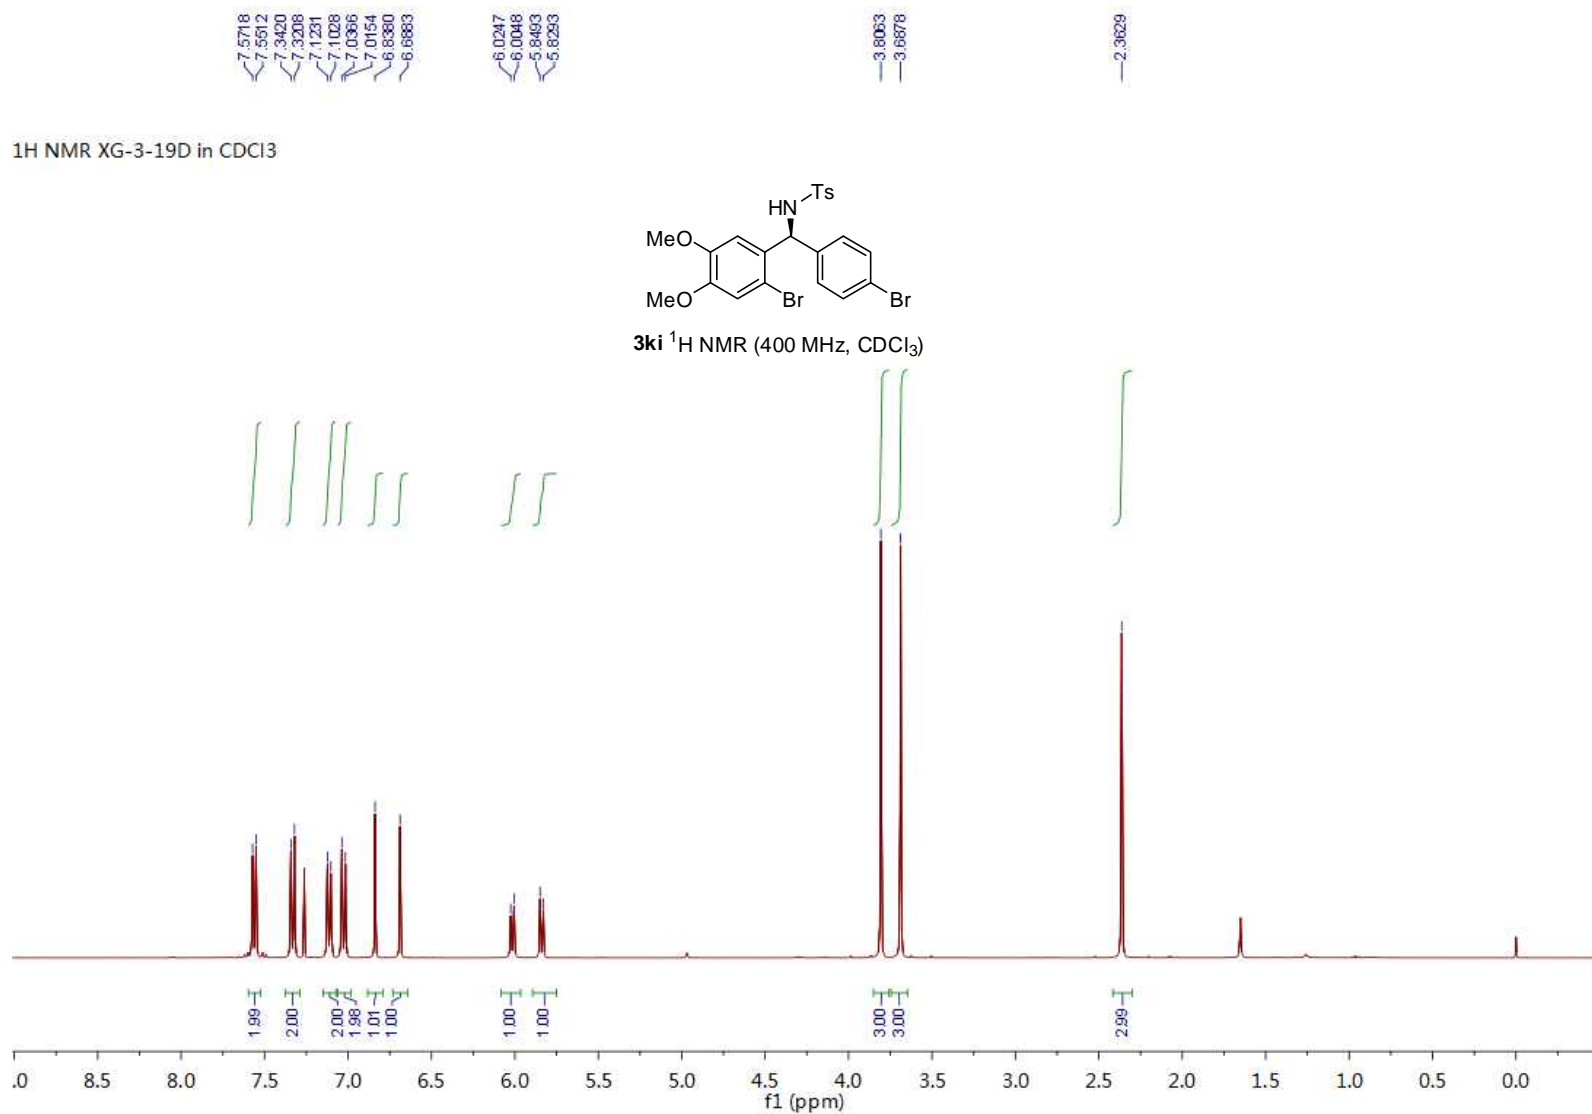

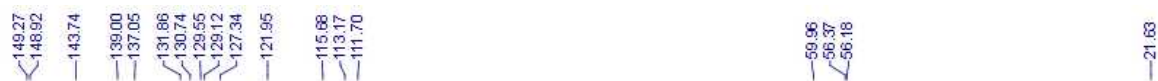

<sup>13</sup>C NMR XG-3-19D in CDCl<sub>3</sub>

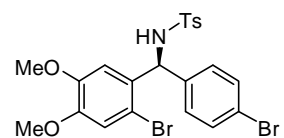

**3ki** <sup>13</sup>C NMR (100 MHz, CDCl<sub>3</sub>)

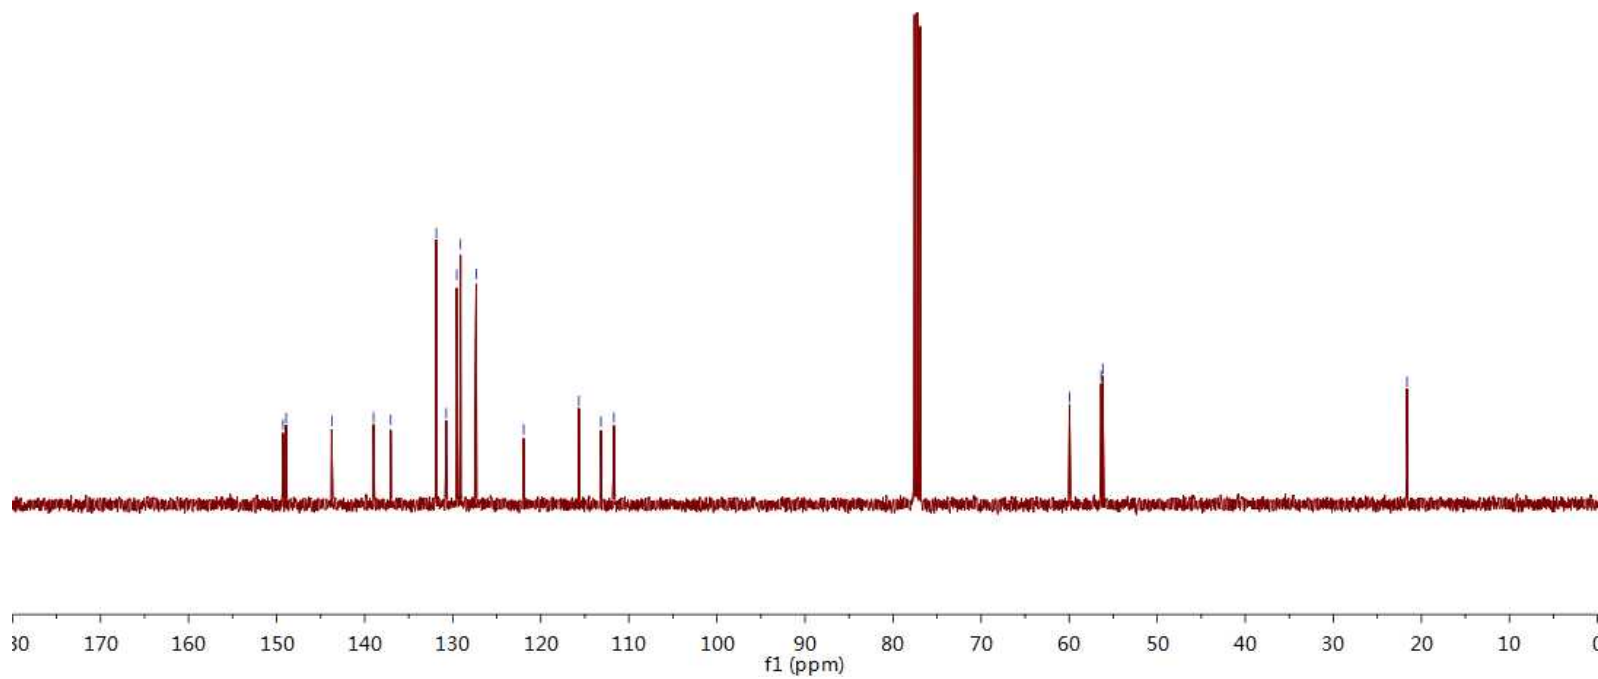

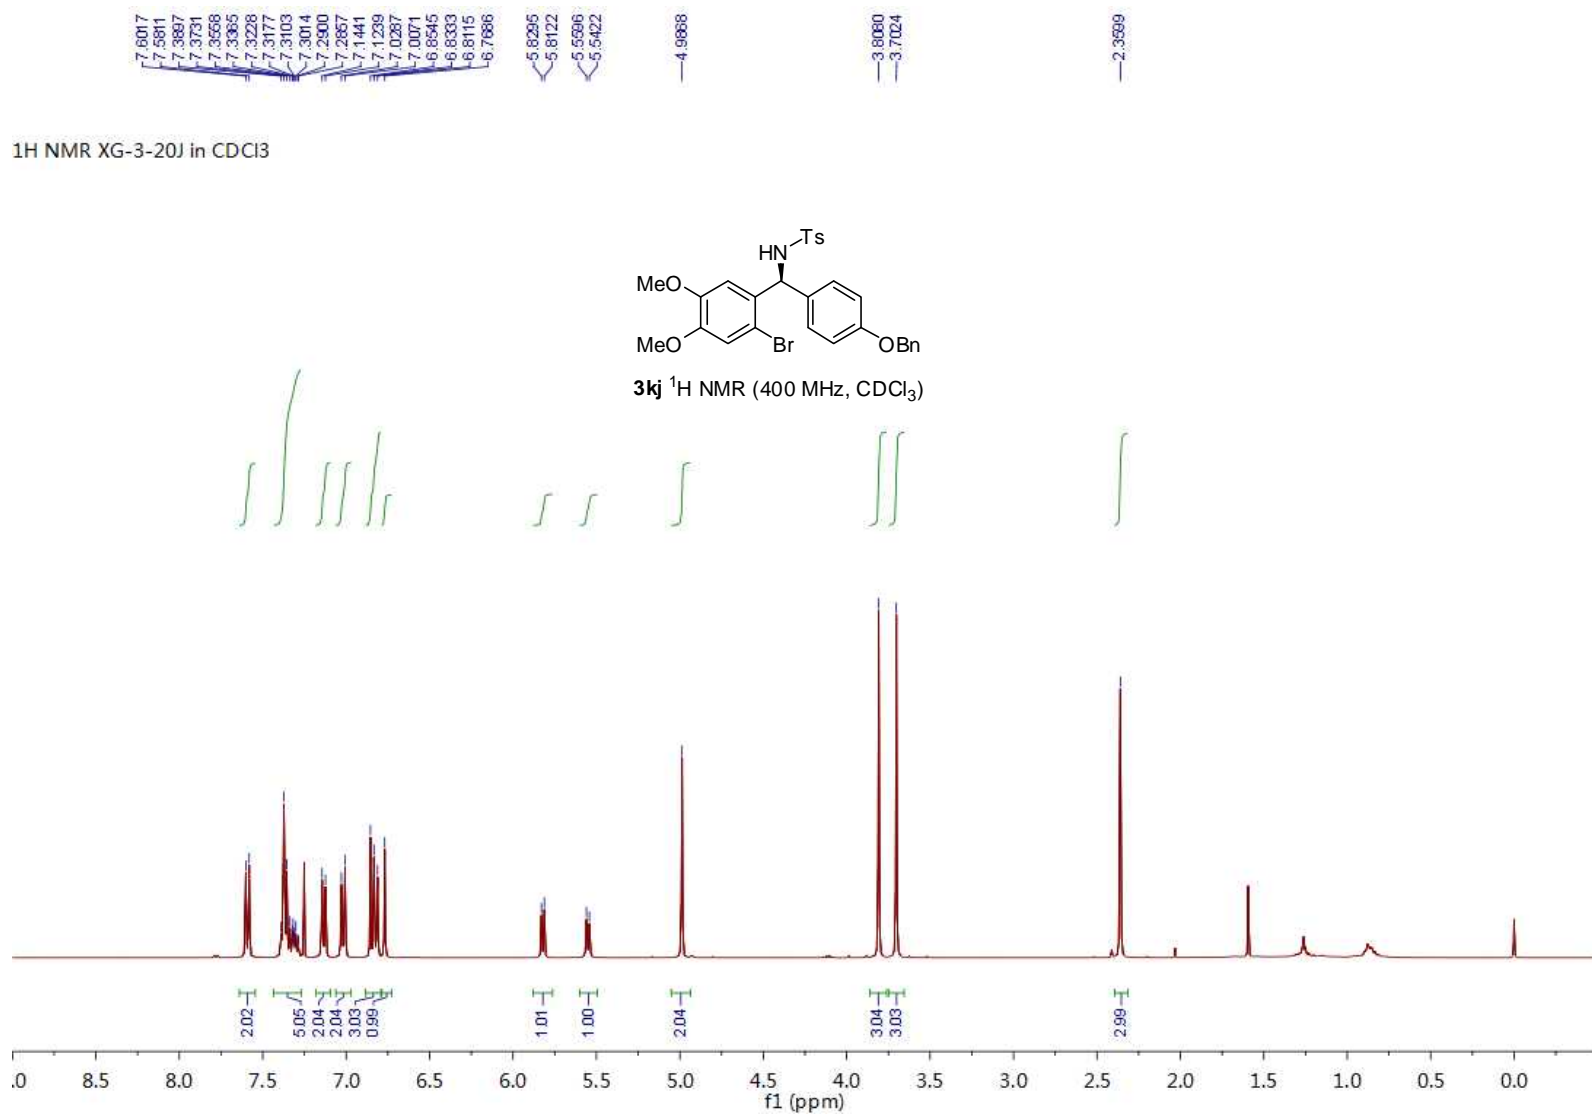

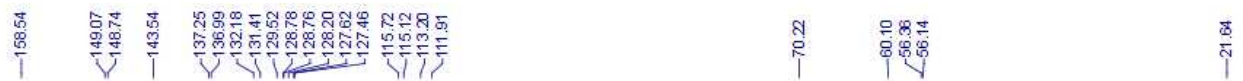

$^{13}\text{C}$  NMR XG-3-20J in  $\text{CDCl}_3$

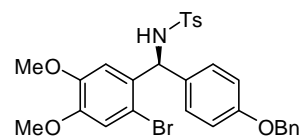

**3kj**  $^{13}\text{C}$  NMR (100 MHz,  $\text{CDCl}_3$ )

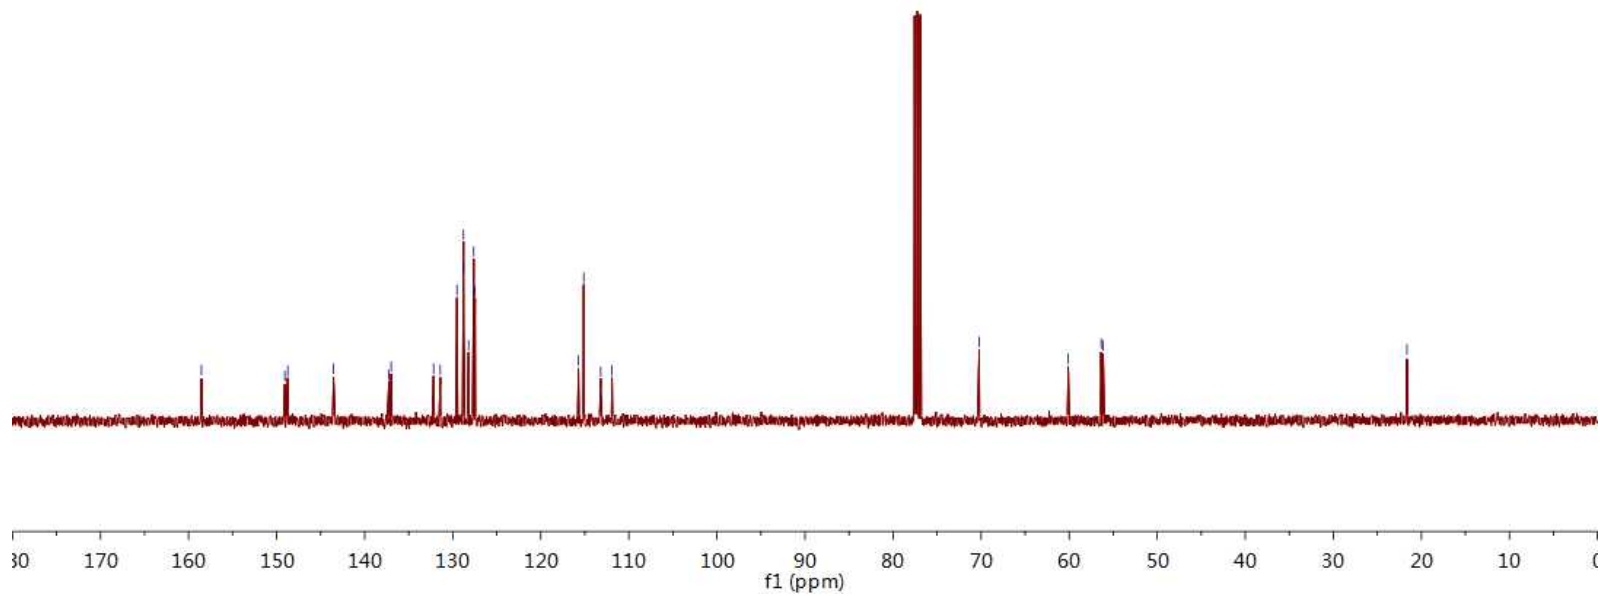



8.0633  
8.0767  
8.0898  
7.8533  
7.8469  
7.8403  
7.8296  
7.7377  
7.7172  
7.5241  
7.5195  
7.5081  
7.5030  
7.4928  
7.4878  
7.4836  
7.4784  
7.4662  
7.4612  
7.2470  
7.2281  
7.2082  
7.0896  
7.0495  
7.0100  
6.9921  
6.9214  
6.7797  
6.6918  
6.6762

5.3350  
5.3194

3.8232  
3.6062

2.3620

<sup>1</sup>H NMR XG-3-20K in CDCl<sub>3</sub>

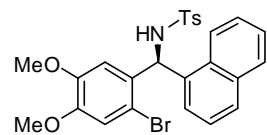

**3kk** <sup>1</sup>H NMR (400 MHz, CDCl<sub>3</sub>)

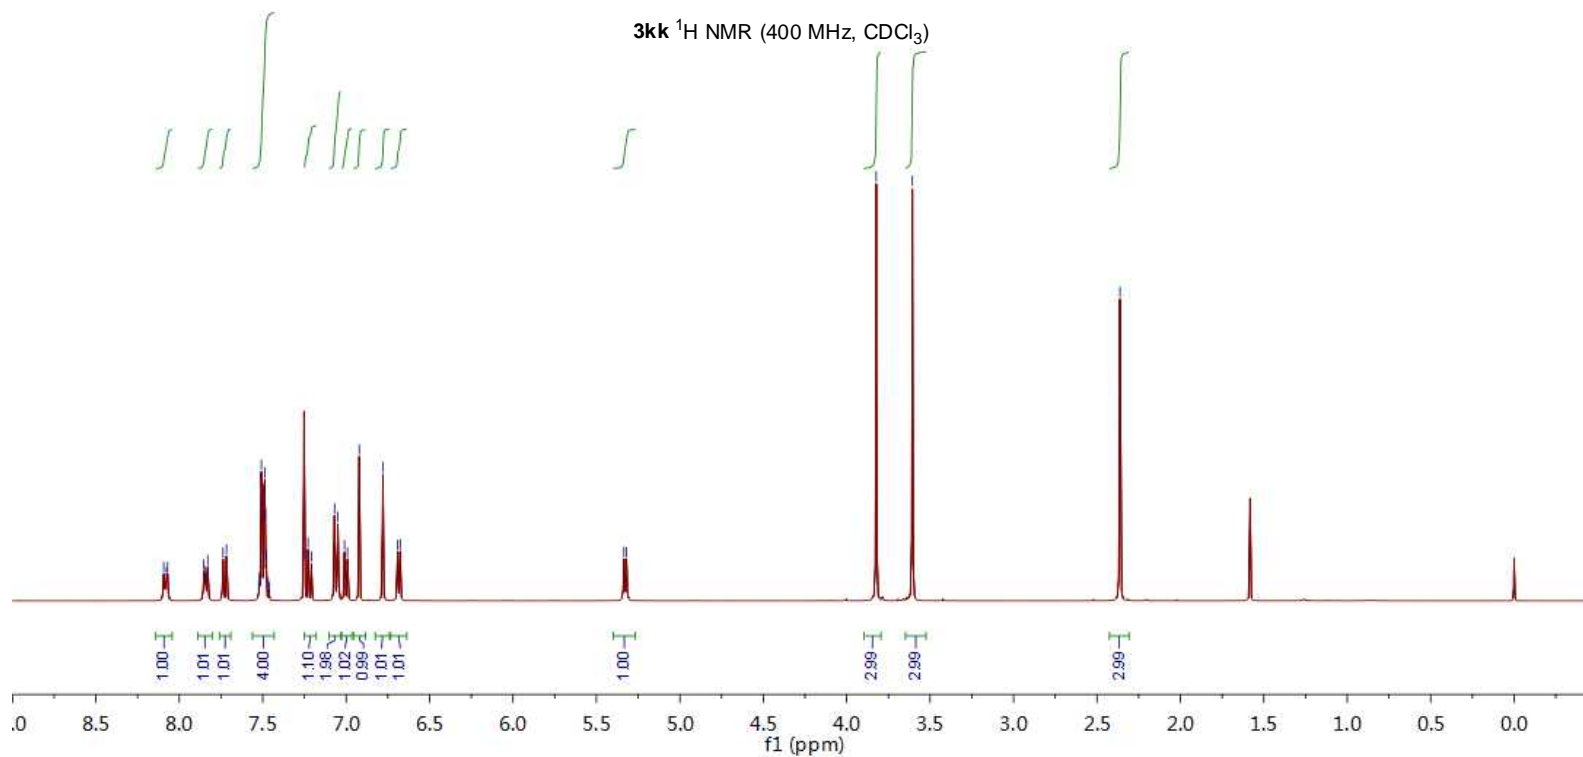

149.12  
148.43  
143.62  
137.32  
135.09  
134.17  
129.90  
129.24  
129.00  
127.48  
127.09  
126.25  
126.16  
125.22  
123.84  
113.63  
112.53

57.40  
56.39  
55.99

21.62

<sup>13</sup>C NMR XG-3-20K in CDCl<sub>3</sub>

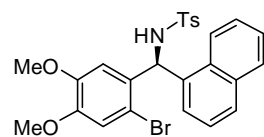

**3kk** <sup>13</sup>C NMR (100 MHz, CDCl<sub>3</sub>)

131.08  
130.66  
129.50  
129.24  
129.00  
127.48  
127.09  
126.25  
126.16  
125.22

<sup>13</sup>C NMR XG-3-20K in CDCl<sub>3</sub>

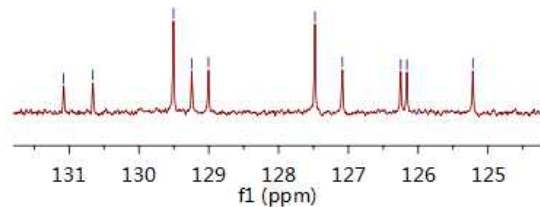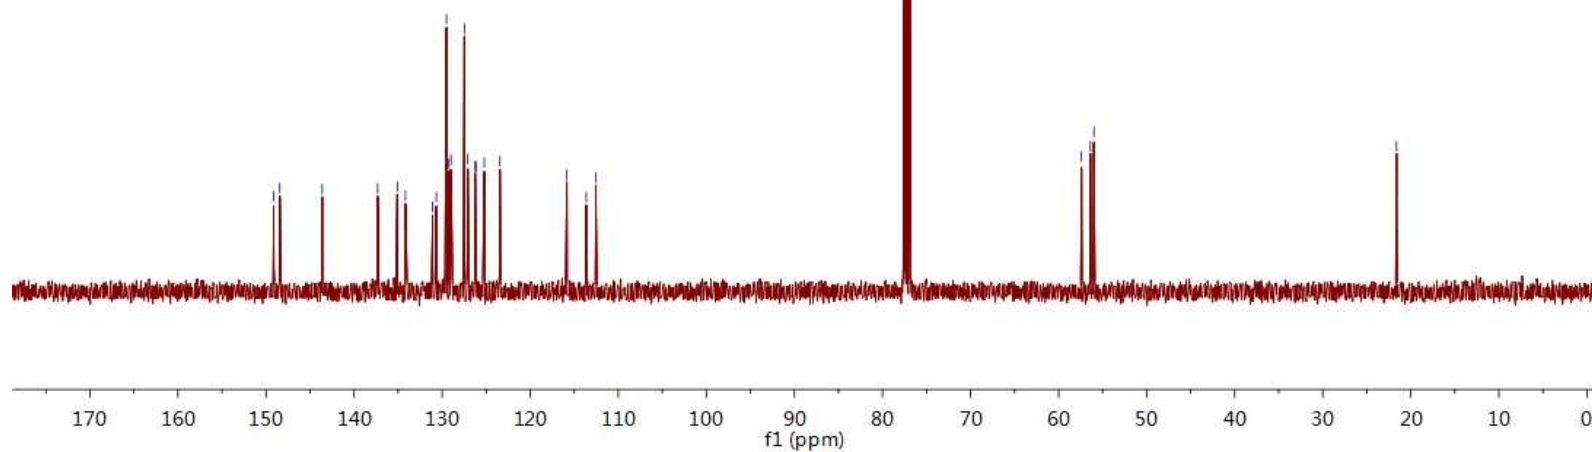

<sup>1</sup>H NMR XG-3-22B in CDCl<sub>3</sub>

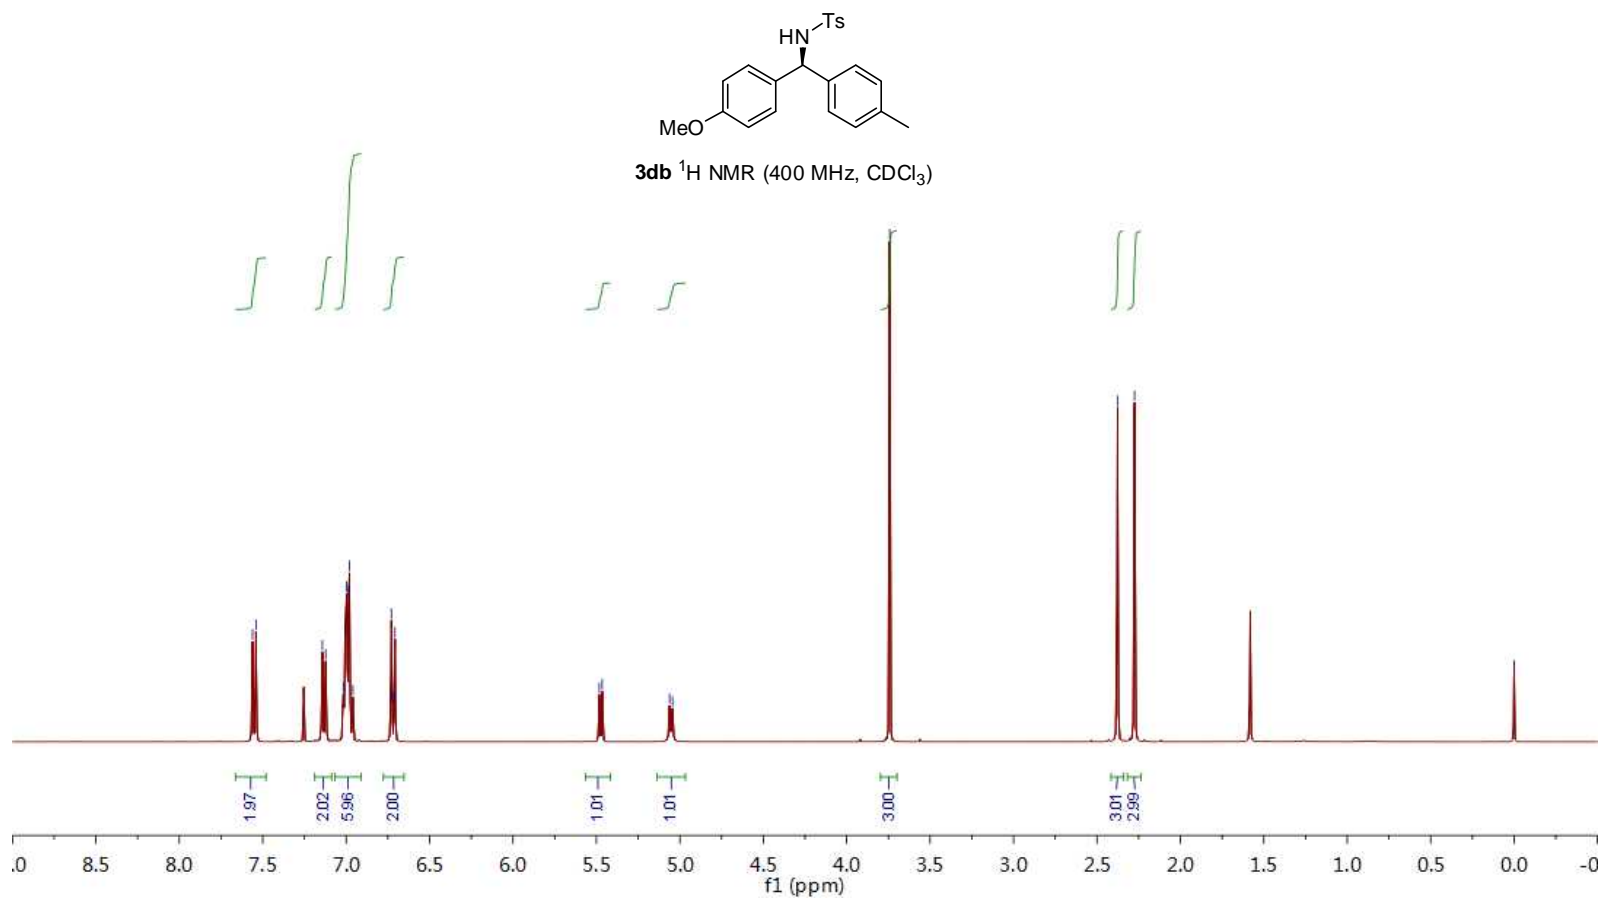

159.17

143.26

138.09

137.73

137.43

133.16

129.51

129.37

128.76

127.45

127.41

114.08

60.84

55.46

21.06

21.20

$^{13}\text{C}$  NMR XG-3-22B in  $\text{CDCl}_3$

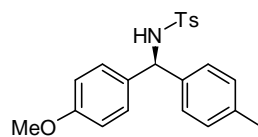

**3db**  $^{13}\text{C}$  NMR (100 MHz,  $\text{CDCl}_3$ )

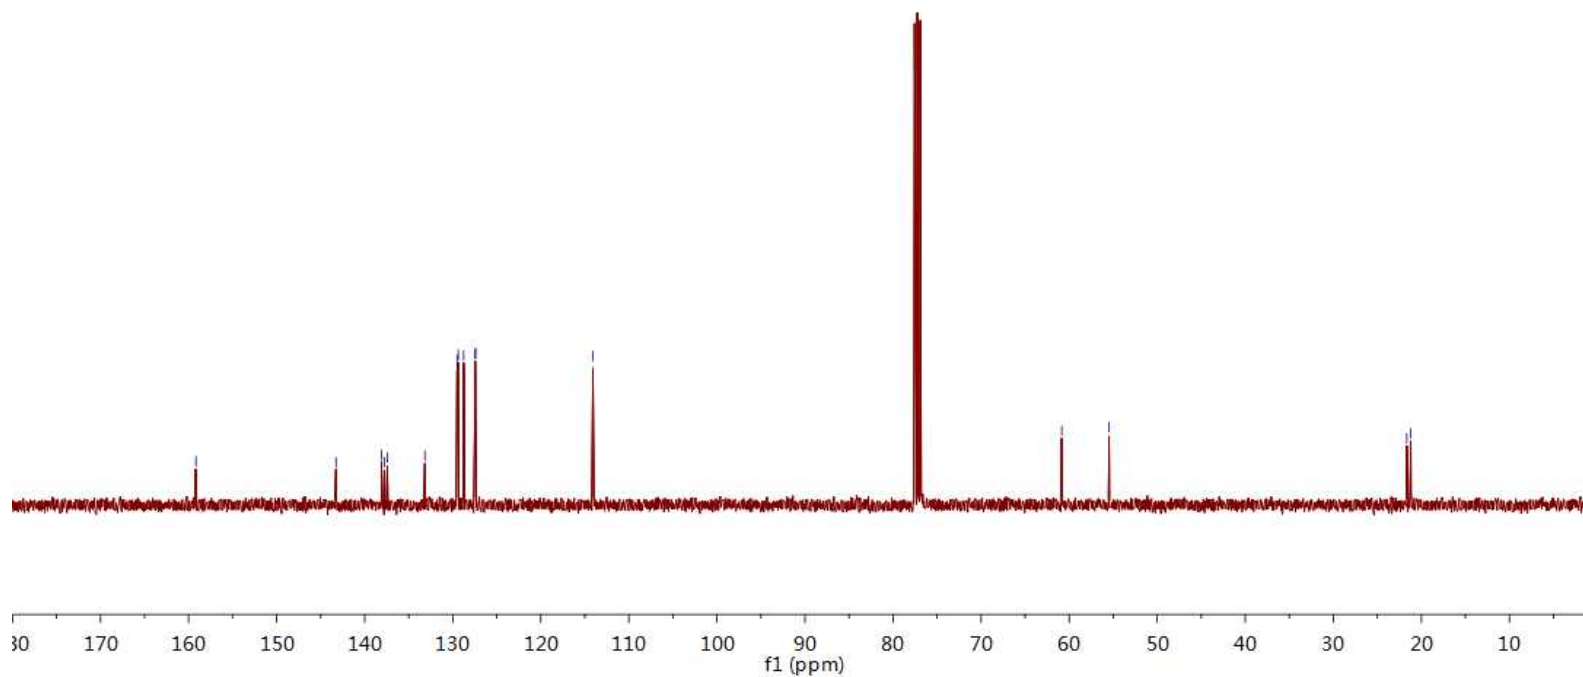

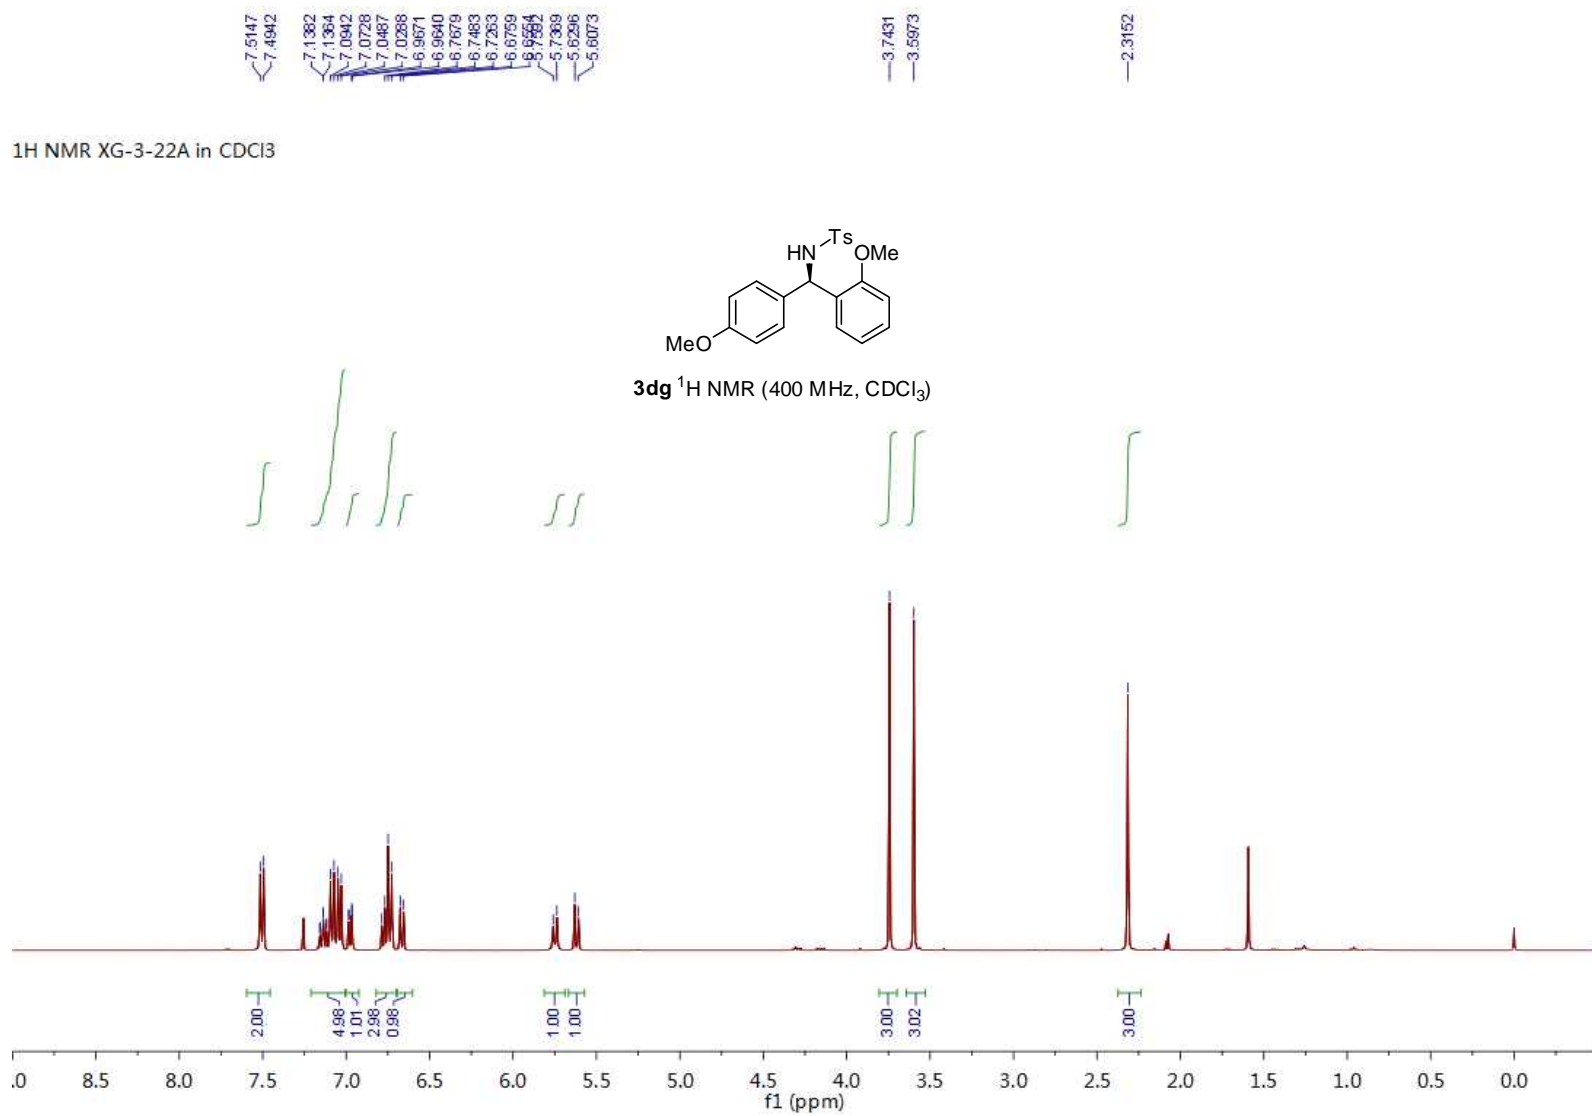

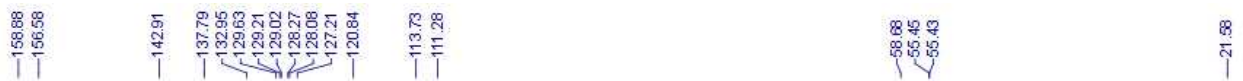

$^{13}\text{C}$  NMR XG-3-22A in  $\text{CDCl}_3$

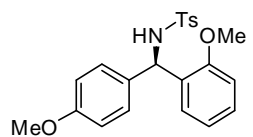

**3dg**  $^{13}\text{C}$  NMR (100 MHz,  $\text{CDCl}_3$ )

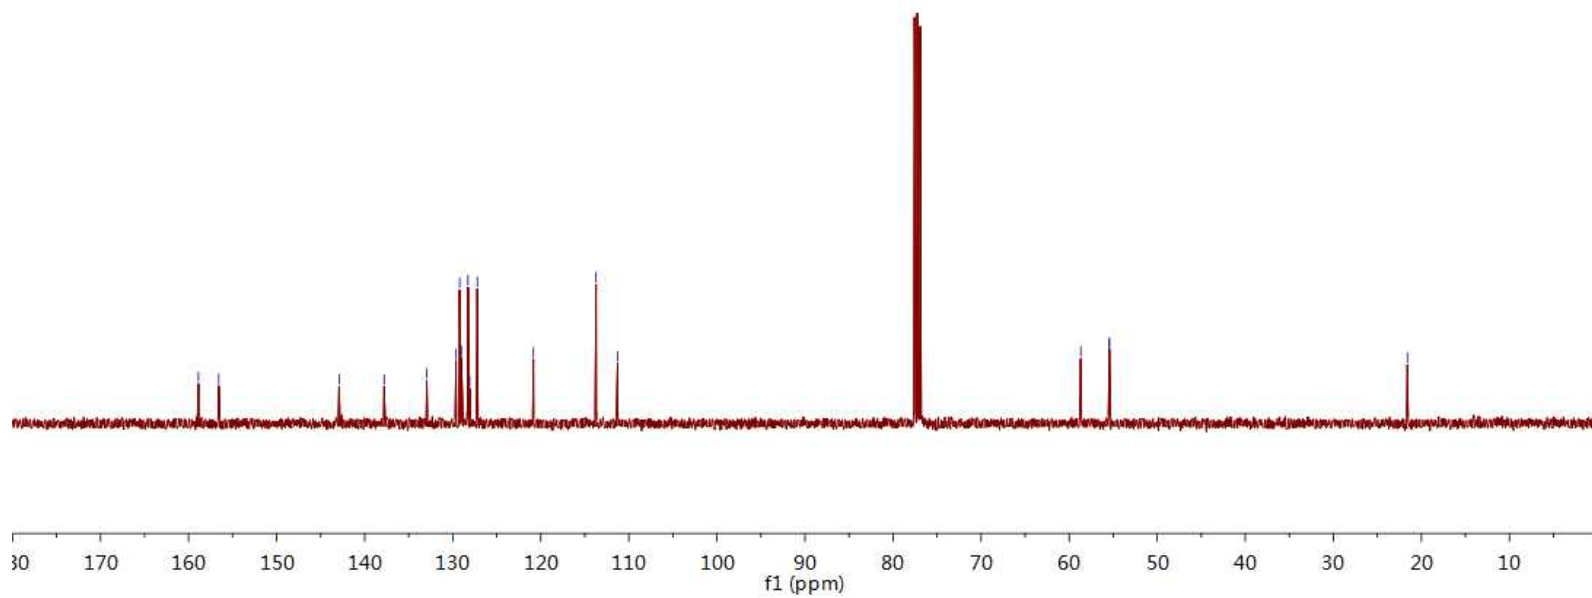

<sup>1</sup>H NMR XG-3-23B in CDCl<sub>3</sub>

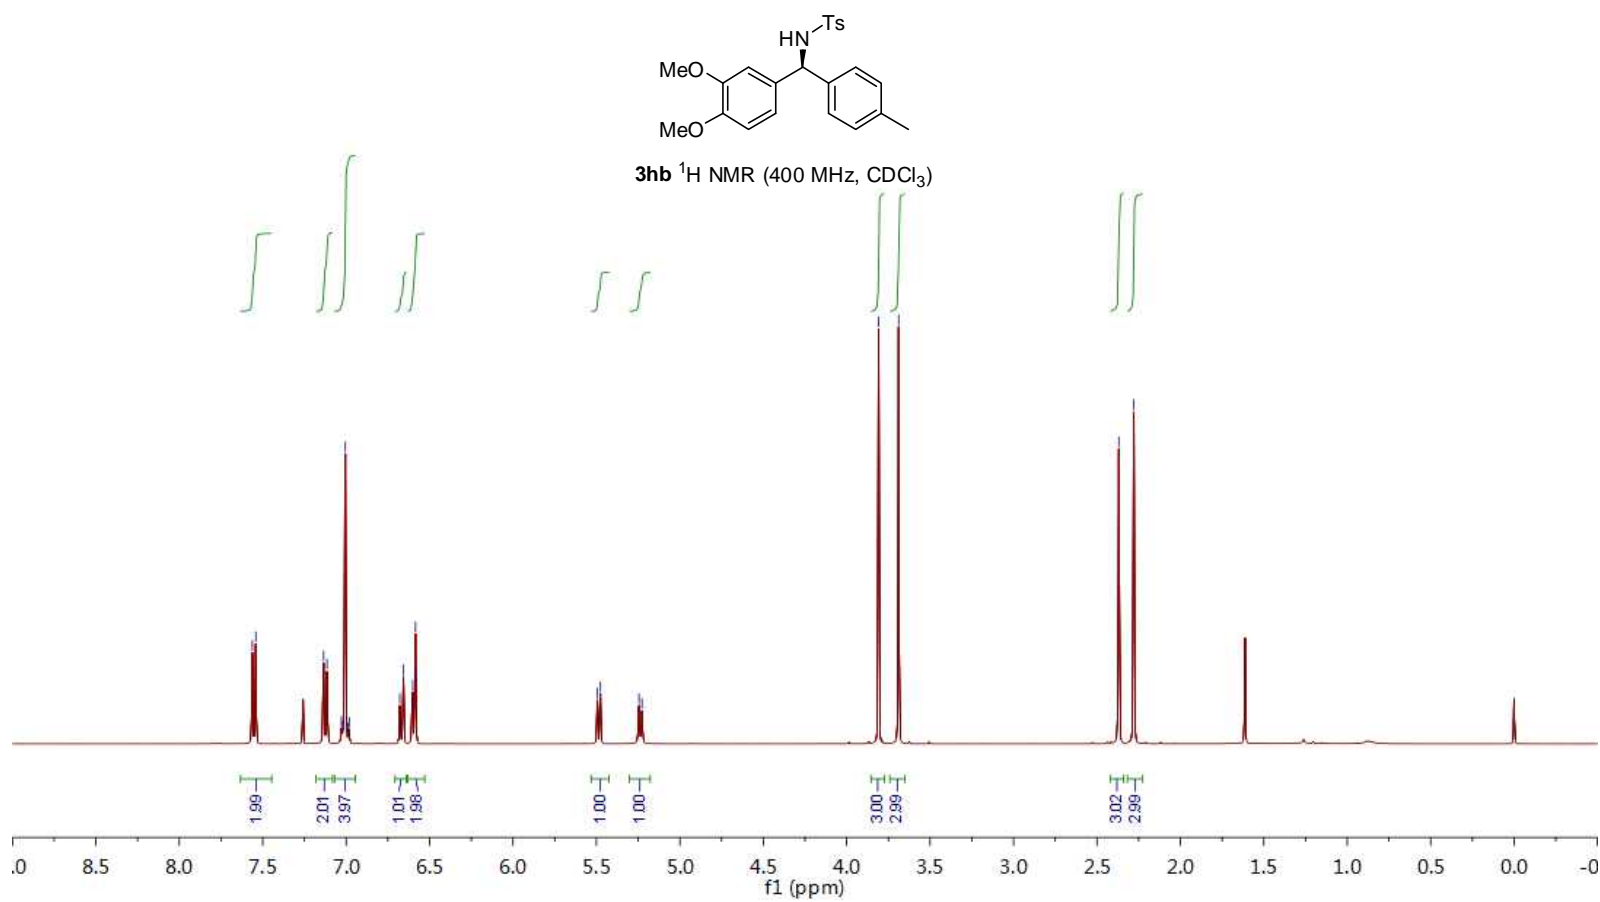

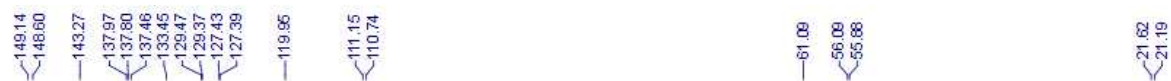

<sup>13</sup>C NMR XG-3-23B in CDCl<sub>3</sub>

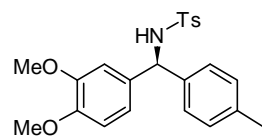

**3hb** <sup>13</sup>C NMR (100 MHz, CDCl<sub>3</sub>)

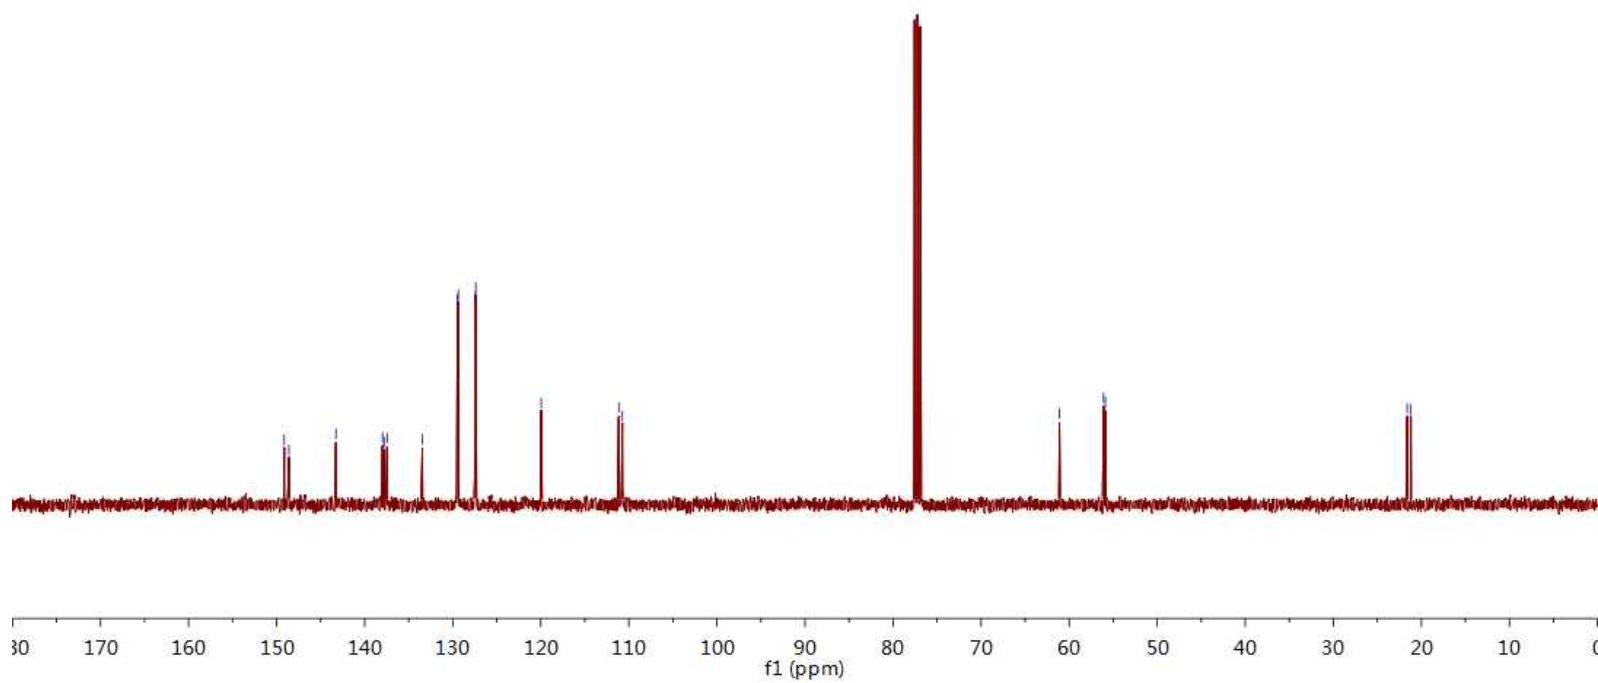



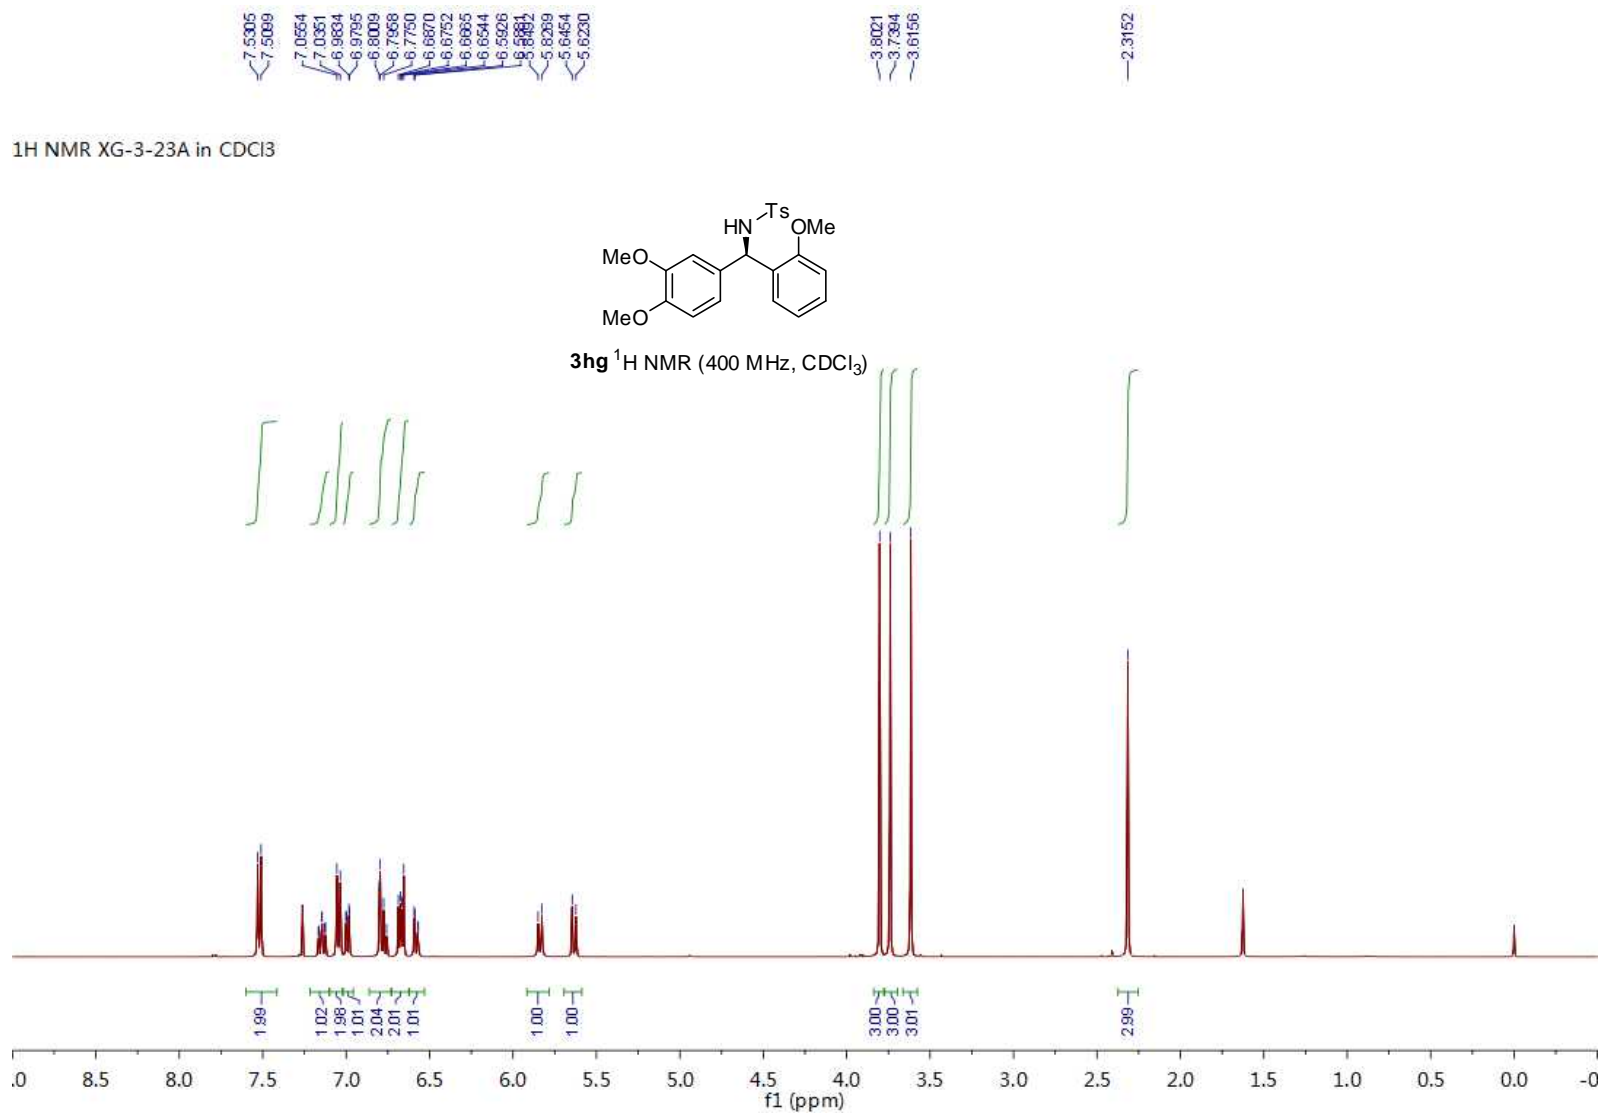

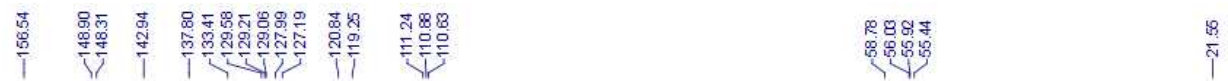

<sup>13</sup>C NMR XG-3-23A in CDCl<sub>3</sub>

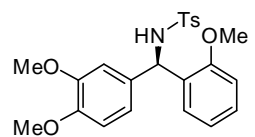

**3hg** <sup>13</sup>C NMR (100 MHz, CDCl<sub>3</sub>)

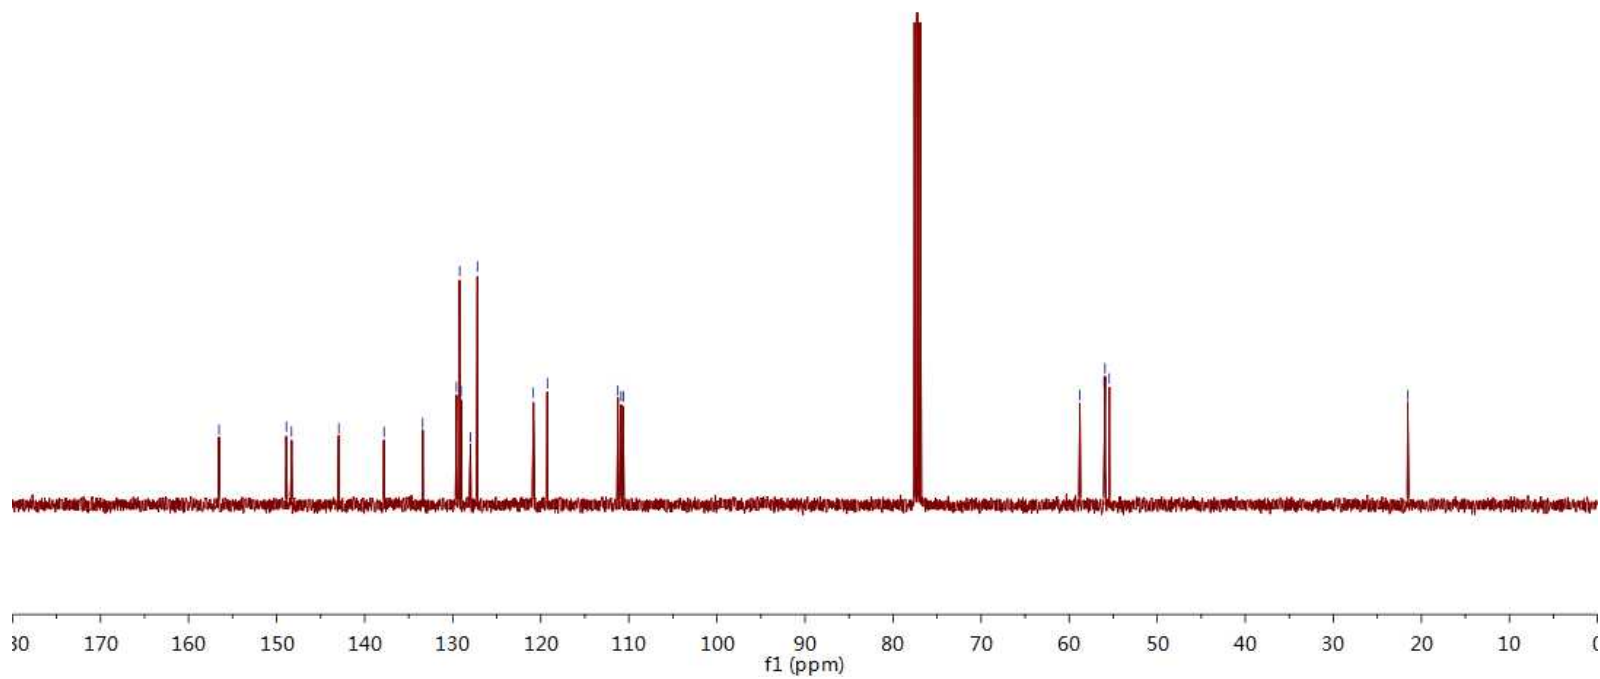

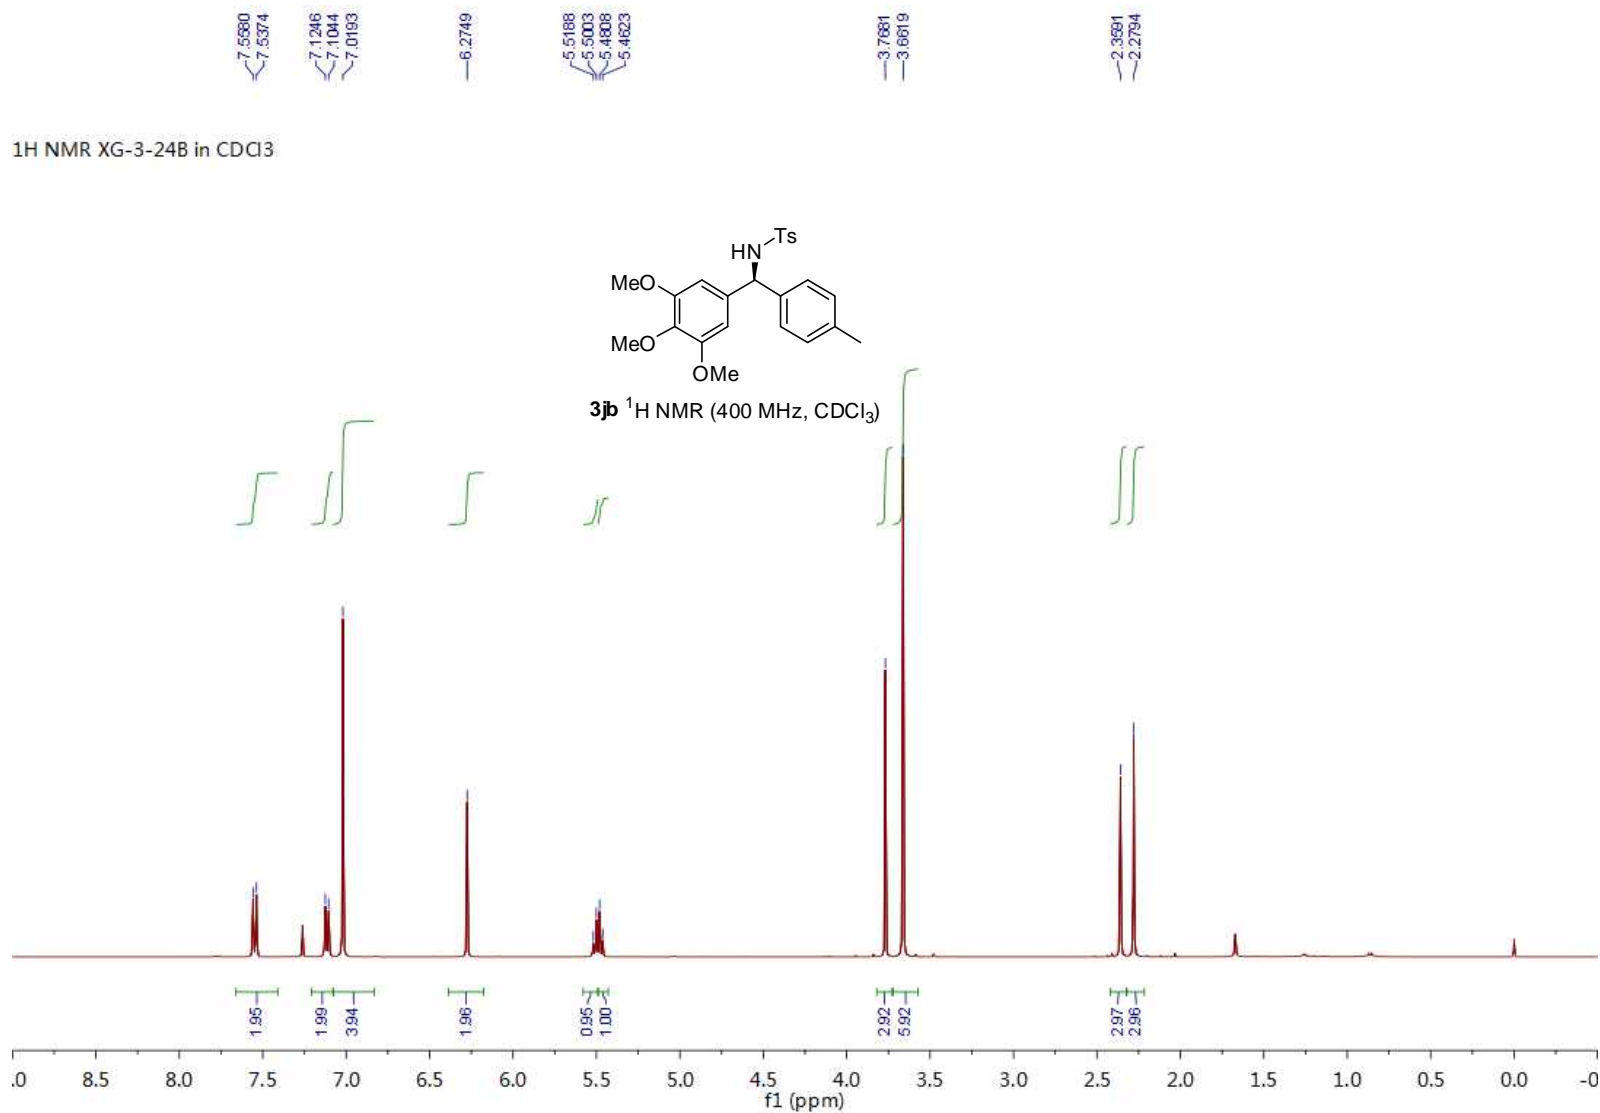

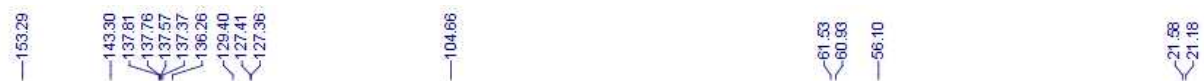

$^{13}\text{C}$  NMR XG-3-24B in  $\text{CDCl}_3$

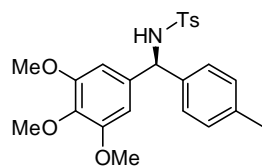

**3hb**  $^{13}\text{C}$  NMR (100 MHz,  $\text{CDCl}_3$ )

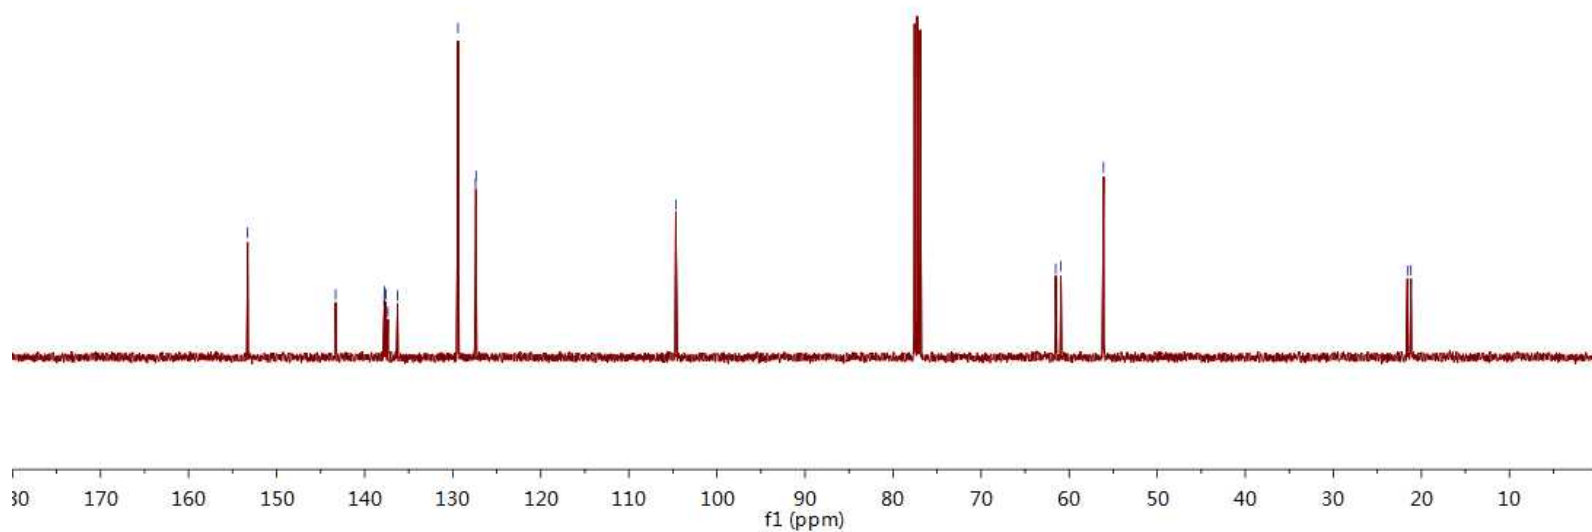

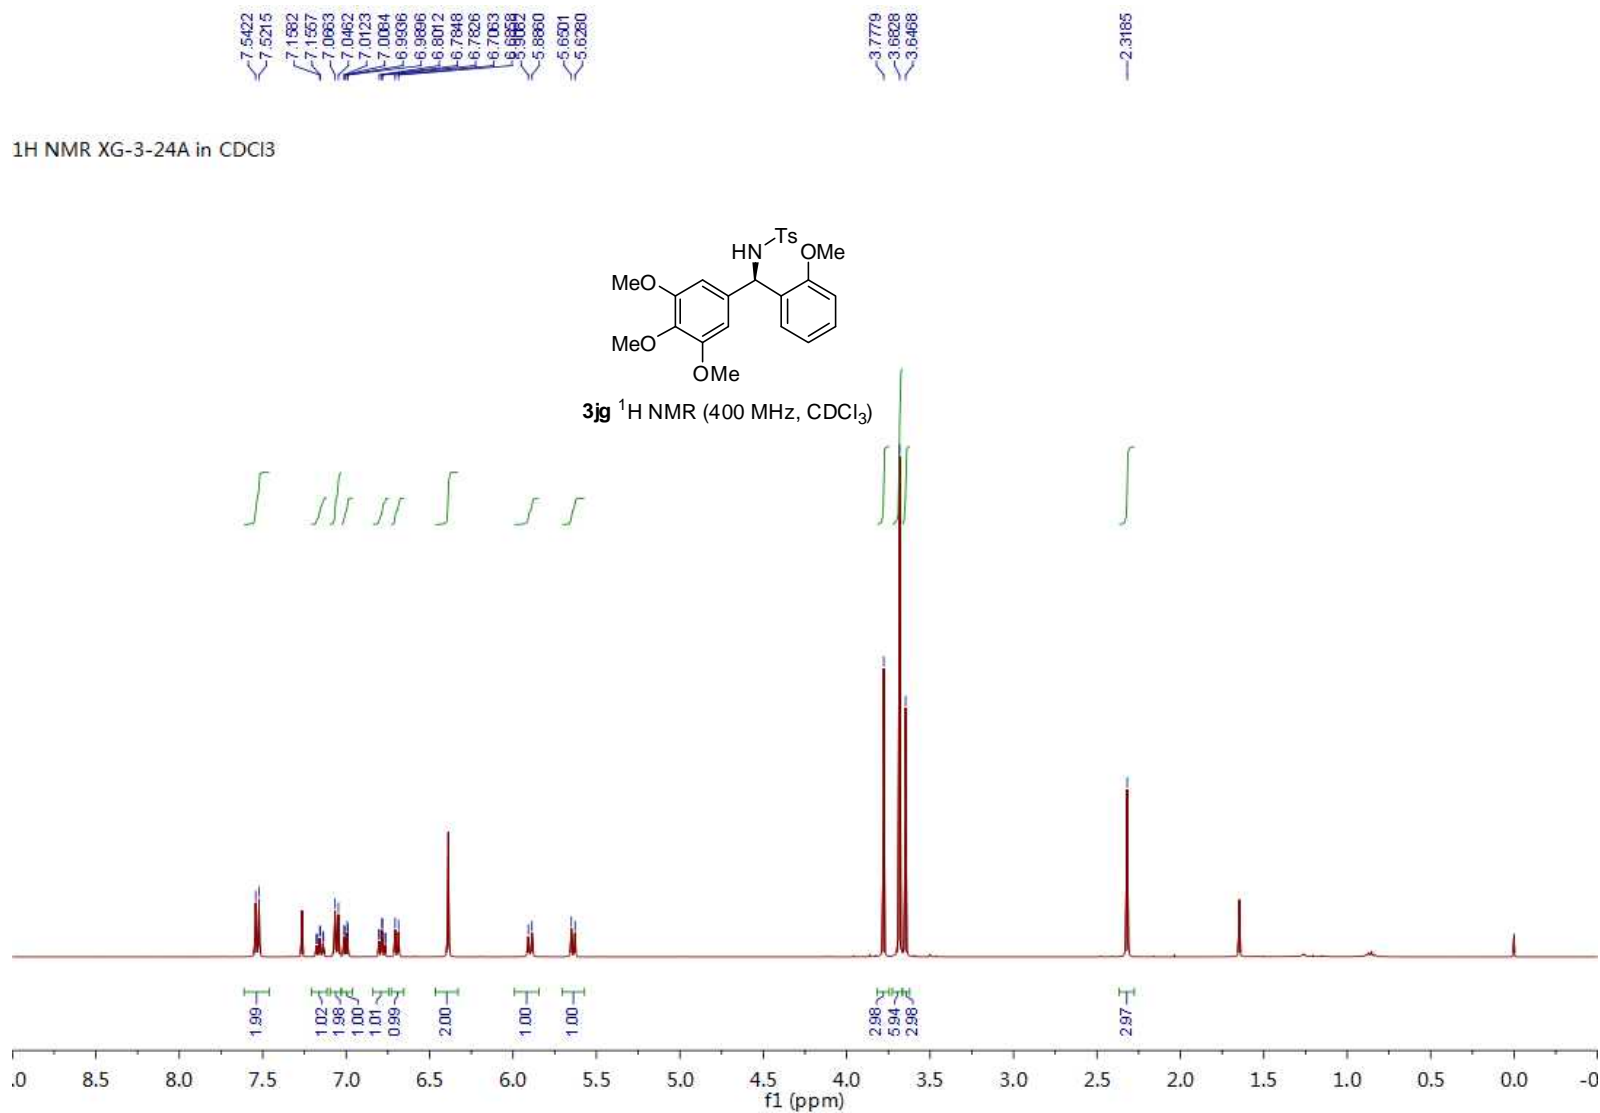

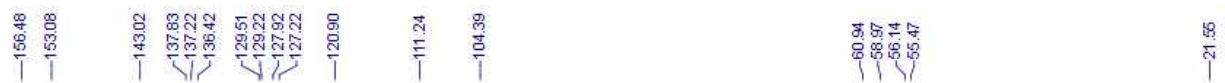

<sup>13</sup>C NMR XG-3-24A in CDCl<sub>3</sub>

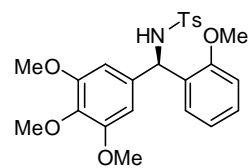

**3jg** <sup>13</sup>C NMR (100 MHz, CDCl<sub>3</sub>)

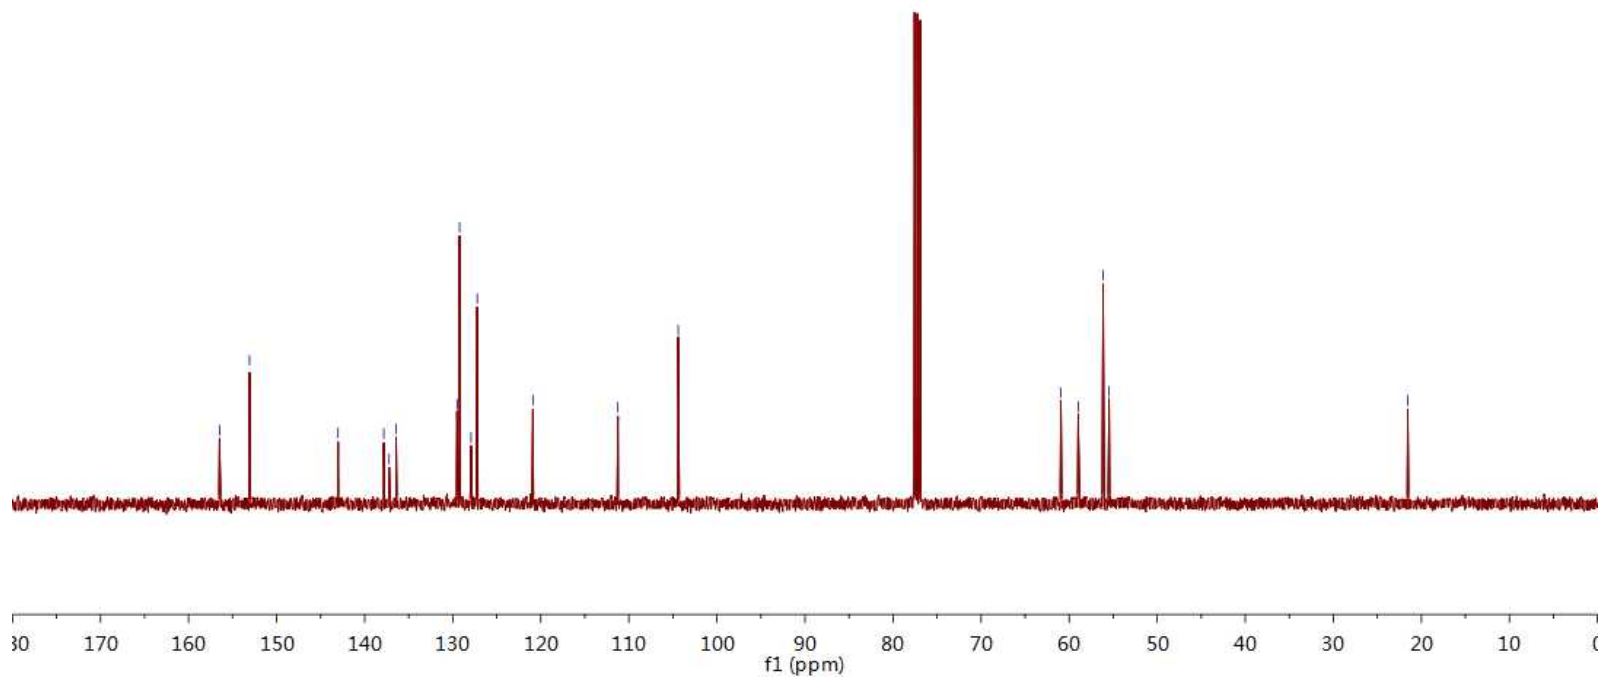

Data File C:\CHEM32\1\DATA\ZHOU-14\YZN005352.D  
 Sample Name: XG-2-95

=====  
 Acq. Operator : Z  
 Acq. Instrument : Instrument 1 Location : Vial 1  
 Injection Date : 6/21/2014 3:33:07 PM  
 Acq. Method : C:\CHEM32\1\METHODS\DEF.LC.M  
 Last changed : 6/21/2014 3:17:06 PM by Z  
 (modified after loading)  
 Analysis Method : C:\CHEM32\1\METHODS\DEF.LC.M  
 Last changed : 10/26/2014 2:46:07 PM by Z  
 (modified after loading)  
 Sample Info : OD-H, H/i-PrOH = 70/30, 0.7 mL/min, 30 oC, 230 nm

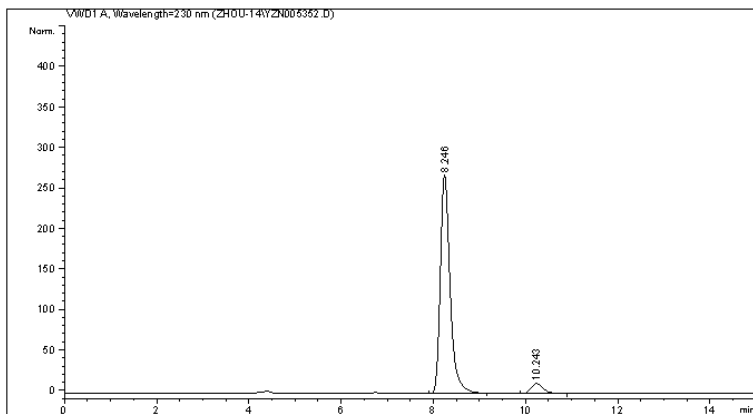

=====  
 Area Percent Report  
 =====

Sorted By : Signal  
 Multiplier: : 1.0000  
 Dilution: : 1.0000  
 Use Multiplier & Dilution Factor with ISTDs

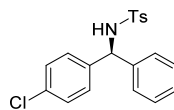

(S)-3aa

Signal 1: VWD1 A, Wavelength=230 nm

| Peak # | RetTime [min] | Type | Width [min] | Area [mAU*s] | Height [mAU] | Area %  |
|--------|---------------|------|-------------|--------------|--------------|---------|
| 1      | 8.246         | BB   | 0.2246      | 3974.63037   | 269.27280    | 94.4607 |
| 2      | 10.243        | BB   | 0.2838      | 233.07684    | 12.54256     | 5.5393  |

Totals : 4207.70721 281.81535

=====  
 \*\*\* End of Report \*\*\*

Data File C:\CHEM32\1\DATA\ZHOU-14\YZN006305.D  
 Sample Name: XG-2-95+

=====  
 Acq. Operator : Z  
 Acq. Instrument : Instrument 1 Location : Vial 1  
 Injection Date : 10/28/2014 10:48:04 AM  
 Acq. Method : C:\CHEM32\1\METHODS\DEF.LC.M  
 Last changed : 10/28/2014 10:07:15 AM by Z  
 (modified after loading)  
 Analysis Method : C:\CHEM32\1\METHODS\DEF.LC.M  
 Last changed : 10/28/2014 1:44:47 PM by Z  
 (modified after loading)  
 Sample Info : OD-H, H/i-PrOH = 70/30, 0.7 mL/min, 30 oC, 230 nm

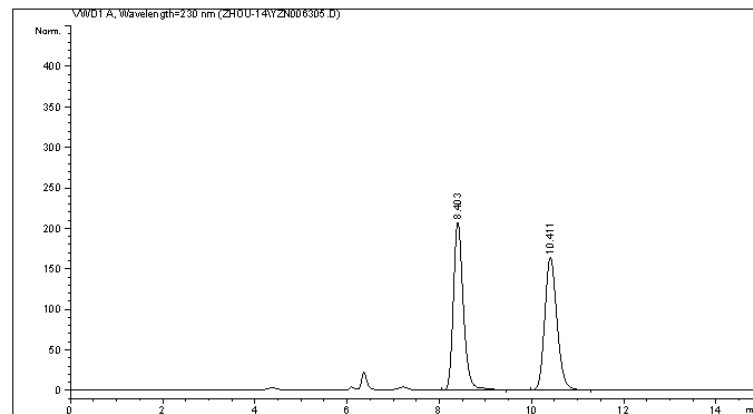

=====  
 Area Percent Report  
 =====

Sorted By : Signal  
 Multiplier: : 1.0000  
 Dilution: : 1.0000  
 Use Multiplier & Dilution Factor with ISTDs

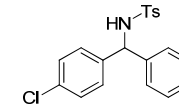

(+/-)-3aa

Signal 1: VWD1 A, Wavelength=230 nm

| Peak # | RetTime [min] | Type | Width [min] | Area [mAU*s] | Height [mAU] | Area %  |
|--------|---------------|------|-------------|--------------|--------------|---------|
| 1      | 8.403         | VB   | 0.2282      | 3101.31641   | 207.58504    | 50.6644 |
| 2      | 10.411        | BB   | 0.2835      | 3019.97388   | 163.79091    | 49.3356 |

Totals : 6121.29028 371.37595

=====  
 \*\*\* End of Report \*\*\*

Data File C:\CHEM32\1\DATA\ZHOU-14\YZN005392.D  
 Sample Name: XG-2-100B

=====  
 Acq. Operator : Z  
 Acq. Instrument : Instrument 1 Location : Vial 1  
 Injection Date : 6/26/2014 2:22:25 PM  
 Acq. Method : C:\CHEM32\1\METHODS\DEF.LC.M  
 Last changed : 6/26/2014 2:18:44 PM by Z  
 (modified after loading)  
 Analysis Method : C:\CHEM32\1\METHODS\DEF.LC.M  
 Last changed : 10/26/2014 2:48:38 PM by Z  
 (modified after loading)  
 Sample Info : OD-H, H/i-PrOH = 80/20, 0.7 mL/min, 30 oC, 230 nm

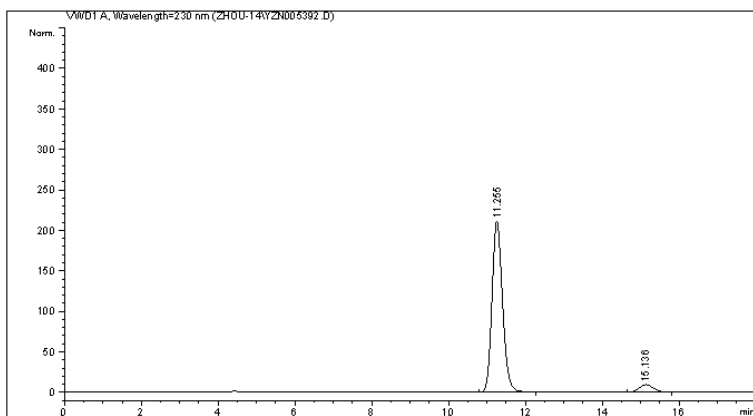

=====  
 Area Percent Report  
 =====

Sorted By : Signal  
 Multiplier: : 1.0000  
 Dilution: : 1.0000  
 Use Multiplier & Dilution Factor with ISTDs

Signal 1: VWD1 A, Wavelength=230 nm

| Peak # | RetTime [min] | Type | Width [min] | Area [mAU*s] | Height [mAU] | Area %  |
|--------|---------------|------|-------------|--------------|--------------|---------|
| 1      | 11.255        | BB   | 0.2938      | 4022.19580   | 210.96710    | 94.3814 |
| 2      | 15.136        | BB   | 0.3963      | 239.44289    | 9.39742      | 5.6186  |

Totals : 4261.63869 220.36452

=====  
 \*\*\* End of Report \*\*\*

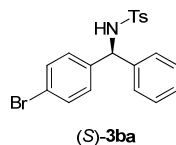

Data File C:\CHEM32\1\DATA\ZHOU-14\YZN005382.D  
 Sample Name: XG-2-100B(+/-)

=====  
 Acq. Operator : Z  
 Acq. Instrument : Instrument 1 Location : Vial 1  
 Injection Date : 6/25/2014 7:51:53 PM  
 Acq. Method : C:\CHEM32\1\METHODS\DEF.LC.M  
 Last changed : 6/25/2014 7:48:12 PM by Z  
 (modified after loading)  
 Analysis Method : C:\CHEM32\1\METHODS\DEF.LC.M  
 Last changed : 10/26/2014 2:48:38 PM by Z  
 (modified after loading)  
 Sample Info : OD-H, H/i-PrOH = 80/20, 0.7 mL/min, 30 oC, 230 nm

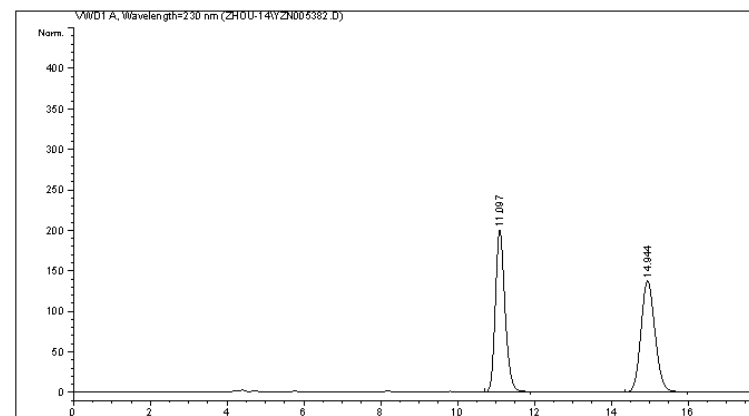

=====  
 Area Percent Report  
 =====

Sorted By : Signal  
 Multiplier: : 1.0000  
 Dilution: : 1.0000  
 Use Multiplier & Dilution Factor with ISTDs

Signal 1: VWD1 A, Wavelength=230 nm

| Peak # | RetTime [min] | Type | Width [min] | Area [mAU*s] | Height [mAU] | Area %  |
|--------|---------------|------|-------------|--------------|--------------|---------|
| 1      | 11.097        | BB   | 0.2619      | 3466.32617   | 199.95967    | 49.8979 |
| 2      | 14.944        | BB   | 0.3914      | 3480.51831   | 137.51115    | 50.1021 |

Totals : 6946.84448 337.47083

=====  
 \*\*\* End of Report \*\*\*

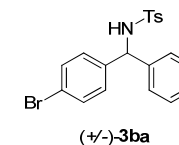



Data File C:\CHEM32\1\DATA\ZHOU-14\YZN005535.D  
 Sample Name: XG-3-13F

```

=====
Acq. Operator   : Z
Acq. Instrument : Instrument 1          Location : Vial 1
Injection Date  : 7/15/2014 4:04:15 PM
Acq. Method    : C:\CHEM32\1\METHODS\DEF.LC.M
Last changed   : 7/15/2014 3:37:55 PM by Z
                (modified after loading)
Analysis Method: C:\CHEM32\1\METHODS\DEF.LC.M
Last changed   : 10/26/2014 3:18:51 PM by Z
                (modified after loading)
Sample Info    : AD-H , H/1-PrOH = 90/10, 0.6 mL/min, 30 oC, 230 nm
  
```

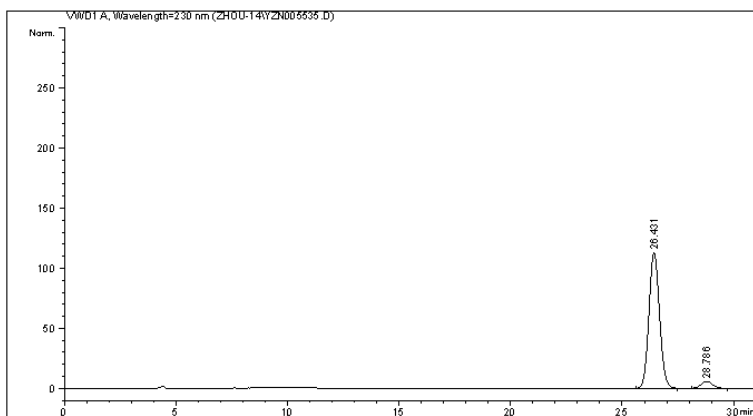

Area Percent Report

```

Sorted By      : Signal
Multiplier:    : 1.0000
Dilution:      : 1.0000
Use Multiplier & Dilution Factor with ISTDs
  
```

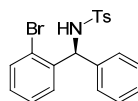

(S)-3ca

Signal 1: VWD1 A, Wavelength=230 nm

| Peak #   | RetTime [min] | Type | Width [min] | Area [mAU*s] | Height [mAU] | Area %  |
|----------|---------------|------|-------------|--------------|--------------|---------|
| 1        | 26.431        | BB   | 0.5144      | 3723.44458   | 112.88479    | 94.8013 |
| 2        | 28.786        | BB   | 0.5539      | 204.18535    | 5.75226      | 5.1987  |
| Totals : |               |      |             | 3927.62993   | 118.63705    |         |

\*\*\* End of Report \*\*\*

Data File C:\CHEM32\1\DATA\ZHOU-14\YZN005536.D  
 Sample Name: XG-3-13F(+/-)

```

=====
Acq. Operator   : Z
Acq. Instrument : Instrument 1          Location : Vial 1
Injection Date  : 7/15/2014 4:39:07 PM
Acq. Method    : C:\CHEM32\1\METHODS\DEF.LC.M
Last changed   : 7/15/2014 4:37:11 PM by Z
                (modified after loading)
Analysis Method: C:\CHEM32\1\METHODS\DEF.LC.M
Last changed   : 10/26/2014 3:18:51 PM by Z
                (modified after loading)
Sample Info    : AD-H , H/1-PrOH = 90/10, 0.6 mL/min, 30 oC, 230 nm
  
```

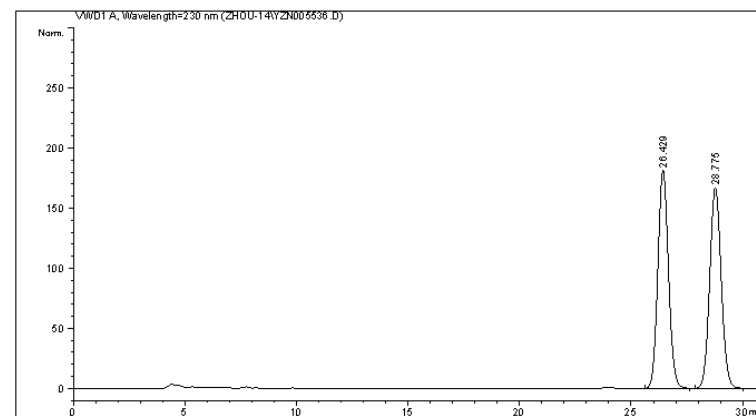

Area Percent Report

```

Sorted By      : Signal
Multiplier:    : 1.0000
Dilution:      : 1.0000
Use Multiplier & Dilution Factor with ISTDs
  
```

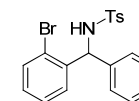

(+/-)-3ca

Signal 1: VWD1 A, Wavelength=230 nm

| Peak #   | RetTime [min] | Type | Width [min] | Area [mAU*s] | Height [mAU] | Area %  |
|----------|---------------|------|-------------|--------------|--------------|---------|
| 1        | 26.429        | BB   | 0.5129      | 6002.84668   | 181.30800    | 50.0505 |
| 2        | 28.775        | BB   | 0.5580      | 5990.73682   | 167.09714    | 49.9495 |
| Totals : |               |      |             | 1.19936e4    | 348.40514    |         |

\*\*\* End of Report \*\*\*

Data File C:\CHEM32\1\DATA\ZHOU-14\YZN005393.D  
 Sample Name: XG-2-100C

```

=====
Acq. Operator   : Z
Acq. Instrument : Instrument 1          Location : Vial 1
Injection Date  : 6/26/2014 2:52:39 PM
Acq. Method     : C:\CHEM32\1\METHODS\DEF.LC.M
Last changed    : 6/26/2014 2:49:25 PM by Z
                  (modified after loading)
Analysis Method : C:\CHEM32\1\METHODS\DEF.LC.M
Last changed    : 10/26/2014 2:48:38 PM by Z
                  (modified after loading)
Sample Info     : OD-H, H/i-PrOH = 80/20, 0.7 mL/min, 30 oC, 230 nm
  
```

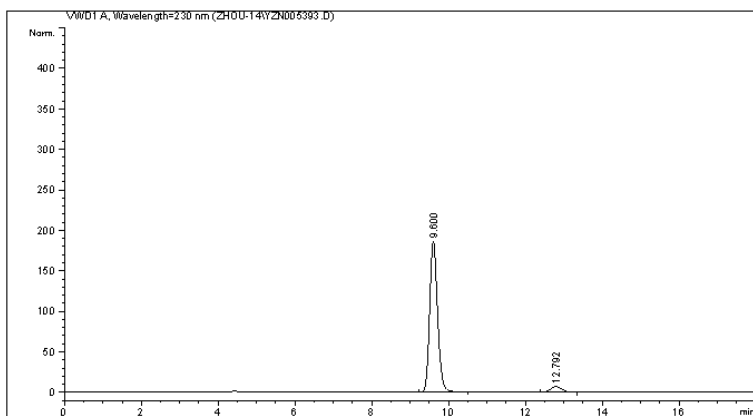

Area Percent Report

```

Sorted By      : Signal
Multiplier:    : 1.0000
Dilution:      : 1.0000
Use Multiplier & Dilution Factor with ISTDs
  
```

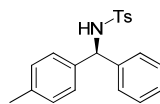

(S)-3da

Signal 1: VWD1 A, Wavelength=230 nm

| Peak # | RetTime [min] | Type | Width [min] | Area [mAU*s] | Height [mAU] | Area %  |
|--------|---------------|------|-------------|--------------|--------------|---------|
| 1      | 9.600         | VB   | 0.2215      | 2673.72021   | 186.06273    | 94.7285 |
| 2      | 12.792        | EB   | 0.3201      | 148.79001    | 7.18998      | 5.2715  |

Totals : 2822.51022 193.25271

\*\*\* End of Report \*\*\*

Data File C:\CHEM32\1\DATA\ZHOU-14\YZN005376.D  
 Sample Name: XG-2-100C(+/-)

```

=====
Acq. Operator   : Z
Acq. Instrument : Instrument 1          Location : Vial 1
Injection Date   : 6/25/2014 2:14:24 PM
Acq. Method     : C:\CHEM32\1\METHODS\DEF.LC.M
Last changed    : 6/25/2014 2:10:29 PM by Z
                  (modified after loading)
Analysis Method : C:\CHEM32\1\METHODS\DEF.LC.M
Last changed    : 10/26/2014 2:48:38 PM by Z
                  (modified after loading)
Sample Info     : OD-H, H/i-PrOH = 80/20, 0.7 mL/min, 30 oC, 230 nm
  
```

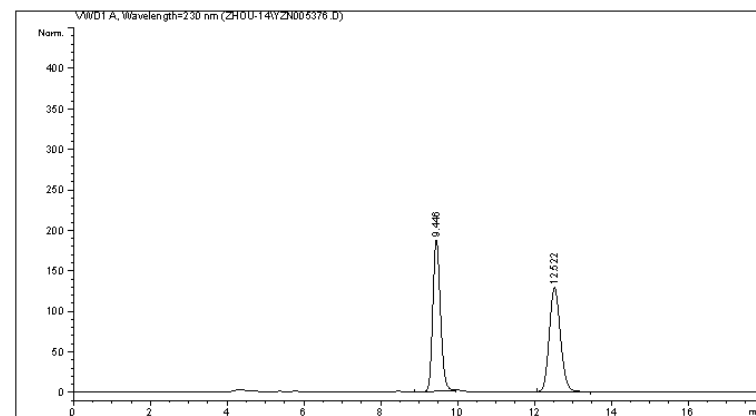

Area Percent Report

```

Sorted By      : Signal
Multiplier:    : 1.0000
Dilution:      : 1.0000
Use Multiplier & Dilution Factor with ISTDs
  
```

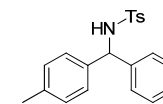

(+/-)-3da

Signal 1: VWD1 A, Wavelength=230 nm

| Peak # | RetTime [min] | Type | Width [min] | Area [mAU*s] | Height [mAU] | Area %  |
|--------|---------------|------|-------------|--------------|--------------|---------|
| 1      | 9.446         | VB   | 0.2139      | 2584.00659   | 186.68997    | 49.6770 |
| 2      | 12.522        | VB   | 0.3142      | 2617.60693   | 128.83852    | 50.3230 |

Totals : 5201.61353 315.52849

\*\*\* End of Report \*\*\*

Data File C:\CHEM32\1\DATA\ZHOU-14\YZN005394.D  
 Sample Name: XG-2-100D

=====  
 Acq. Operator : Z  
 Acq. Instrument : Instrument 1 Location : Vial 1  
 Injection Date : 6/26/2014 3:36:36 PM  
 Acq. Method : C:\CHEM32\1\METHODS\DEF.LC.M  
 Last changed : 6/26/2014 3:24:01 PM by Z  
 (modified after loading)  
 Analysis Method : C:\CHEM32\1\METHODS\DEF.LC.M  
 Last changed : 10/26/2014 2:55:51 PM by Z  
 (modified after loading)  
 Sample Info : OD-H, H/i-PrOH = 80/20, 0.7 mL/min, 30 oC, 230 nm

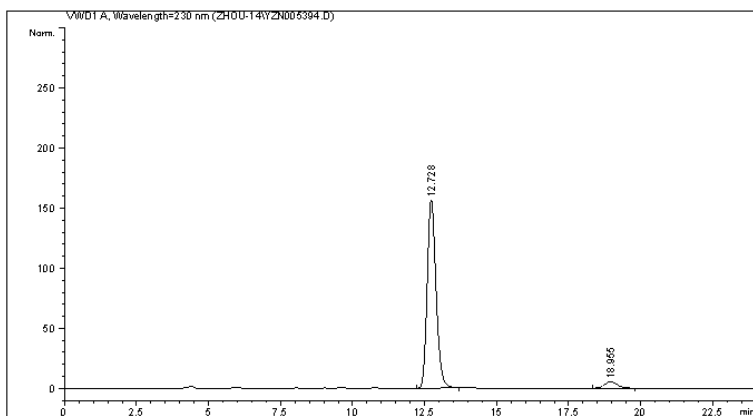

=====  
 Area Percent Report  
 =====

Sorted By : Signal  
 Multiplier: : 1.0000  
 Dilution: : 1.0000  
 Use Multiplier & Dilution Factor with ISTDs

Signal 1: VWD1 A, Wavelength=230 nm

| Peak # | RetTime [min] | Type | Width [min] | Area [mAU*s] | Height [mAU] | Area %  |
|--------|---------------|------|-------------|--------------|--------------|---------|
| 1      | 12.728        | BB   | 0.3302      | 3356.14478   | 156.56738    | 95.2701 |
| 2      | 18.955        | BB   | 0.4899      | 166.62212    | 5.24685      | 4.7299  |

Totals : 3522.76689 161.81423

=====  
 \*\*\* End of Report \*\*\*

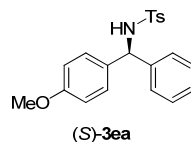

Data File C:\CHEM32\1\DATA\ZHOU-14\YZN005384.D  
 Sample Name: XG-2-100D(+/-)

=====  
 Acq. Operator : Z  
 Acq. Instrument : Instrument 1 Location : Vial 1  
 Injection Date : 6/25/2014 9:18:54 PM  
 Acq. Method : C:\CHEM32\1\METHODS\DEF.LC.M  
 Last changed : 6/25/2014 9:15:55 PM by Z  
 (modified after loading)  
 Analysis Method : C:\CHEM32\1\METHODS\DEF.LC.M  
 Last changed : 10/26/2014 2:55:51 PM by Z  
 (modified after loading)  
 Sample Info : OD-H, H/i-PrOH = 80/20, 0.7 mL/min, 30 oC, 230 nm

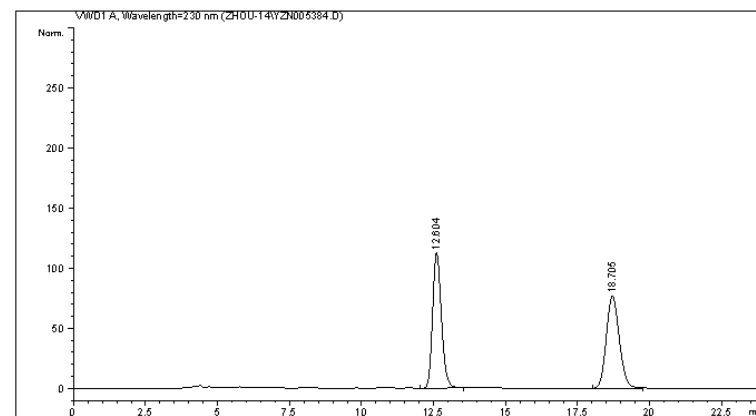

=====  
 Area Percent Report  
 =====

Sorted By : Signal  
 Multiplier: : 1.0000  
 Dilution: : 1.0000  
 Use Multiplier & Dilution Factor with ISTDs

Signal 1: VWD1 A, Wavelength=230 nm

| Peak # | RetTime [min] | Type | Width [min] | Area [mAU*s] | Height [mAU] | Area %  |
|--------|---------------|------|-------------|--------------|--------------|---------|
| 1      | 12.604        | VB   | 0.3289      | 2398.68262   | 112.44901    | 49.9346 |
| 2      | 18.705        | BB   | 0.4862      | 2404.96313   | 76.79391     | 50.0654 |

Totals : 4803.64575 189.24291

=====  
 \*\*\* End of Report \*\*\*

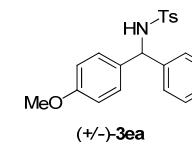

Data File C:\CHEM32\1\DATA\ZHOU-14\YZN005428.D  
 Sample Name: XG-2-101G

=====  
 Acq. Operator : Z  
 Acq. Instrument : Instrument 1 Location : Vial 1  
 Injection Date : 7/1/2014 4:45:45 PM  
 Acq. Method : C:\CHEM32\1\METHODS\DEF.LC.M  
 Last changed : 7/1/2014 4:45:06 PM by Z  
 (modified after loading)  
 Analysis Method : C:\CHEM32\1\METHODS\DEF.LC.M  
 Last changed : 10/26/2014 3:02:57 PM by Z  
 (modified after loading)  
 Sample Info : 0D-H, H/i-PrOH = 70/30, 0.7 mL/min, 30 oC, 230 nm

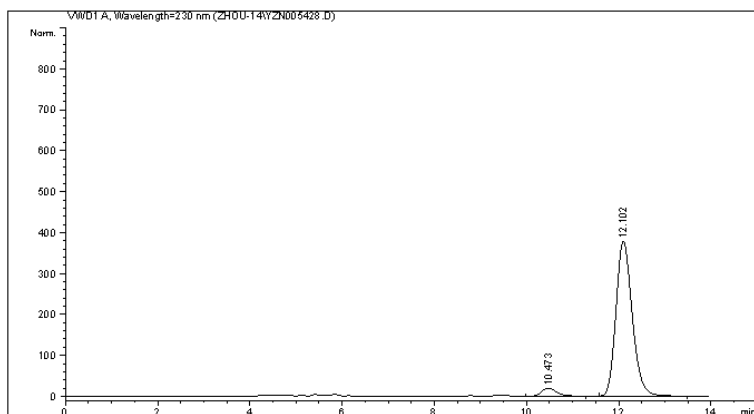

=====  
 Area Percent Report  
 =====

Sorted By : Signal  
 Multiplier: : 1.0000  
 Dilution: : 1.0000  
 Use Multiplier & Dilution Factor with ISTDs

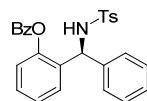

(-)-3fa'

Signal 1: VWD1 A, Wavelength=230 nm

| Peak #   | RetTime [min] | Type | Width [min] | Area [mAU*s] | Height [mAU] | Area %  |
|----------|---------------|------|-------------|--------------|--------------|---------|
| 1        | 10.473        | VB   | 0.3505      | 452.91052    | 19.85701     | 4.6566  |
| 2        | 12.102        | EB   | 0.3792      | 9273.20996   | 378.26114    | 95.3434 |
| Totals : |               |      |             | 9726.12048   | 398.11815    |         |

=====  
 \*\*\* End of Report \*\*\*

Data File C:\CHEM32\1\DATA\ZHOU-14\YZN005475.D  
 Sample Name: XG-2-101G(+/-)

=====  
 Acq. Operator : Z  
 Acq. Instrument : Instrument 1 Location : Vial 1  
 Injection Date : 7/7/2014 9:04:13 PM  
 Acq. Method : C:\CHEM32\1\METHODS\DEF.LC.M  
 Last changed : 7/7/2014 8:25:55 PM by Z  
 (modified after loading)  
 Analysis Method : C:\CHEM32\1\METHODS\DEF.LC.M  
 Last changed : 10/26/2014 3:02:57 PM by Z  
 (modified after loading)  
 Sample Info : 0D-H, H/i-PrOH = 70/30, 0.7 mL/min, 30 oC, 230 nm

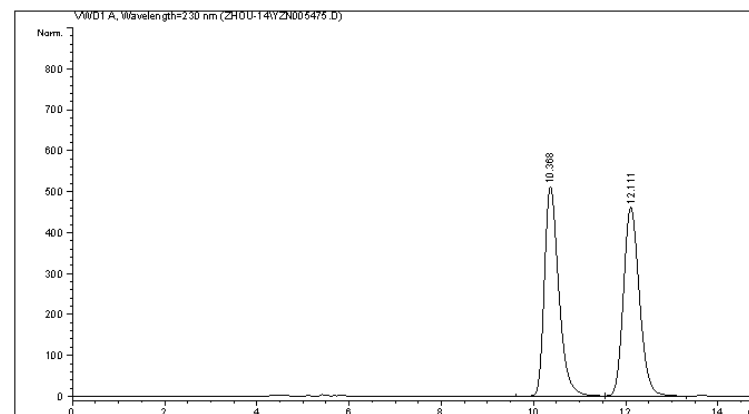

=====  
 Area Percent Report  
 =====

Sorted By : Signal  
 Multiplier: : 1.0000  
 Dilution: : 1.0000  
 Use Multiplier & Dilution Factor with ISTDs

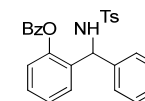

(+/-)-3fa'

Signal 1: VWD1 A, Wavelength=230 nm

| Peak #   | RetTime [min] | Type | Width [min] | Area [mAU*s] | Height [mAU] | Area %  |
|----------|---------------|------|-------------|--------------|--------------|---------|
| 1        | 10.368        | EV   | 0.3313      | 1.10674e4    | 511.02350    | 49.9023 |
| 2        | 12.111        | VB   | 0.3712      | 1.11108e4    | 461.34305    | 50.0977 |
| Totals : |               |      |             | 2.21782e4    | 972.36655    |         |

=====  
 \*\*\* End of Report \*\*\*

Data File C:\CHEM32\1\DATA\ZHOU-14\YZN005436.D  
 Sample Name: XG-3-2A

=====  
 Acq. Operator : Z  
 Acq. Instrument : Instrument 1 Location : Vial 1  
 Injection Date : 7/2/2014 3:18:59 PM  
 Acq. Method : C:\CHEM32\1\METHODS\DEF LC.M  
 Last changed : 7/2/2014 3:15:29 PM by Z  
 (modified after loading)  
 Analysis Method : C:\CHEM32\1\METHODS\DEF LC.M  
 Last changed : 10/26/2014 3:06:47 PM by Z  
 (modified after loading)  
 Sample Info : OD-H, H/i-PrOH = 80/20, 0.7 mL/min, 30 oC, 230 nm

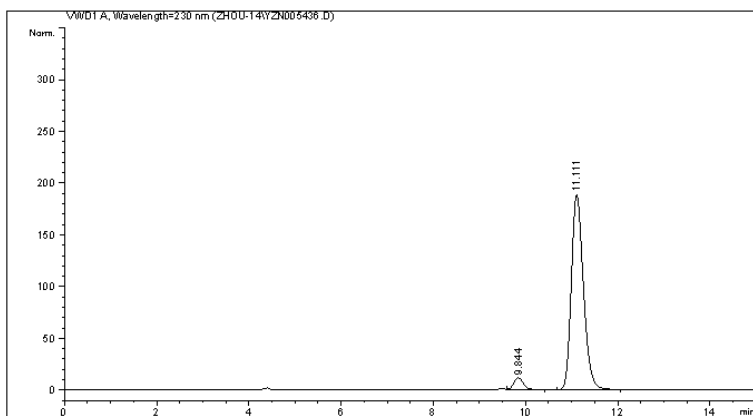

=====  
 Area Percent Report  
 =====

Sorted By : Signal  
 Multiplier: : 1.0000  
 Dilution: : 1.0000  
 Use Multiplier & Dilution Factor with ISTDs

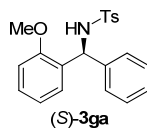

Signal 1: VWD1 A, Wavelength=230 nm

| Peak # | RetTime [min] | Type | Width [min] | Area [mAU*s] | Height [mAU] | Area %  |
|--------|---------------|------|-------------|--------------|--------------|---------|
| 1      | 9.844         | VB   | 0.2273      | 171.16779    | 11.51236     | 4.7384  |
| 2      | 11.111        | BB   | 0.2801      | 3441.17310   | 188.38029    | 95.2616 |

Totals : 3612.34088 199.89266

=====  
 \*\*\* End of Report \*\*\*

Data File C:\CHEM32\1\DATA\ZHOU-14\YZN005429.D  
 Sample Name: XG-3-2A(+/-)

=====  
 Acq. Operator : Z  
 Acq. Instrument : Instrument 1 Location : Vial 1  
 Injection Date : 7/2/2014 9:03:04 AM  
 Acq. Method : C:\CHEM32\1\METHODS\DEF LC.M  
 Last changed : 7/2/2014 8:31:28 AM by Z  
 (modified after loading)  
 Analysis Method : C:\CHEM32\1\METHODS\DEF LC.M  
 Last changed : 10/26/2014 3:05:32 PM by Z  
 (modified after loading)  
 Sample Info : OD-H, H/i-PrOH = 80/20, 0.7 mL/min, 30 oC, 230 nm

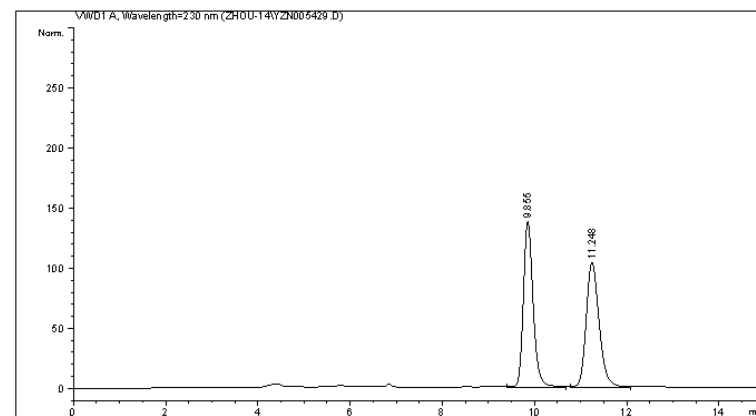

=====  
 Area Percent Report  
 =====

Sorted By : Signal  
 Multiplier: : 1.0000  
 Dilution: : 1.0000  
 Use Multiplier & Dilution Factor with ISTDs

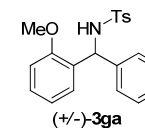

Signal 1: VWD1 A, Wavelength=230 nm

| Peak # | RetTime [min] | Type | Width [min] | Area [mAU*s] | Height [mAU] | Area %  |
|--------|---------------|------|-------------|--------------|--------------|---------|
| 1      | 9.855         | VB   | 0.2257      | 2029.90002   | 137.81155    | 49.9445 |
| 2      | 11.248        | BB   | 0.2998      | 2034.41455   | 103.88252    | 50.0555 |

Totals : 4064.31458 241.69408

=====  
 \*\*\* End of Report \*\*\*

Data File C:\CHEM32\1\DATA\ZHOU-14\YZN005482.D  
 Sample Name: XG-3-BB

=====  
 Acq. Operator : Z  
 Acq. Instrument : Instrument 1 Location : Vial 1  
 Injection Date : 7/8/2014 9:31:24 PM  
 Acq. Method : C:\CHEM32\1\METHODS\DEF.LC.M  
 Last changed : 7/8/2014 8:54:17 PM by Z  
 (modified after loading)  
 Analysis Method : C:\CHEM32\1\METHODS\DEF.LC.M  
 Last changed : 10/26/2014 3:11:38 PM by Z  
 (modified after loading)  
 Sample Info : IA , H/i-PrOH = 90/10, 1.0 mL/min, 30 oC, 230 nm

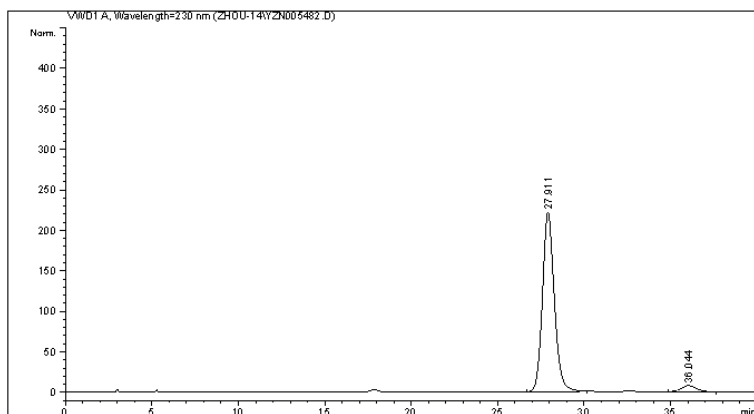

=====  
 Area Percent Report  
 =====

Sorted By : Signal  
 Multiplier: : 1.0000  
 Dilution: : 1.0000  
 Use Multiplier & Dilution Factor with ISTDs

Signal 1: VWD1 A, Wavelength=230 nm

| Peak # | RetTime [min] | Type | Width [min] | Area [mAU*s] | Height [mAU] | Area %  |
|--------|---------------|------|-------------|--------------|--------------|---------|
| 1      | 27.911        | BB   | 0.7236      | 1.05684e4    | 221.69336    | 95.8313 |
| 2      | 36.044        | BB   | 0.9194      | 459.73584    | 7.54145      | 4.1687  |

Totals : 1.10282e4 229.23481

=====  
 \*\*\* End of Report \*\*\*

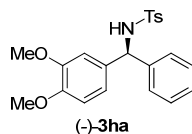

Data File C:\CHEM32\1\DATA\ZHOU-14\YZN005485.D  
 Sample Name: XG-3-BB(+/-)

=====  
 Acq. Operator : Z  
 Acq. Instrument : Instrument 1 Location : Vial 1  
 Injection Date : 7/9/2014 9:24:33 PM  
 Acq. Method : C:\CHEM32\1\METHODS\DEF.LC.M  
 Last changed : 7/9/2014 9:02:20 PM by Z  
 (modified after loading)  
 Analysis Method : C:\CHEM32\1\METHODS\DEF.LC.M  
 Last changed : 10/26/2014 3:10:21 PM by Z  
 (modified after loading)  
 Sample Info : IA , H/i-PrOH = 90/10, 1.0 mL/min, 30 oC, 230 nm

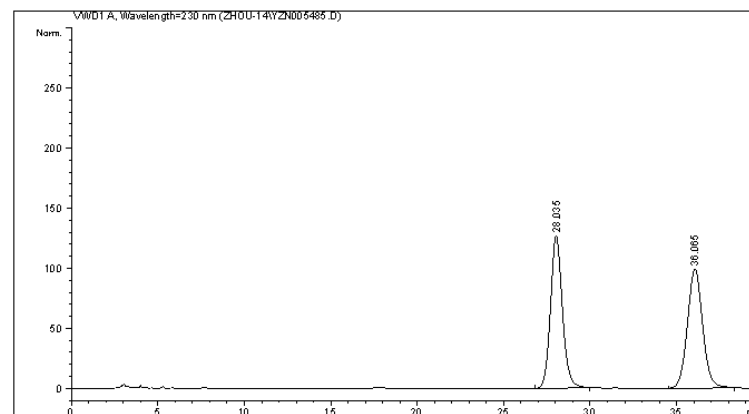

=====  
 Area Percent Report  
 =====

Sorted By : Signal  
 Multiplier: : 1.0000  
 Dilution: : 1.0000  
 Use Multiplier & Dilution Factor with ISTDs

Signal 1: VWD1 A, Wavelength=230 nm

| Peak # | RetTime [min] | Type | Width [min] | Area [mAU*s] | Height [mAU] | Area %  |
|--------|---------------|------|-------------|--------------|--------------|---------|
| 1      | 28.035        | BB   | 0.7260      | 6066.37500   | 127.02946    | 49.9744 |
| 2      | 36.065        | BB   | 0.9376      | 6072.60010   | 98.91083     | 50.0256 |

Totals : 1.21390e4 225.94029

=====  
 \*\*\* End of Report \*\*\*

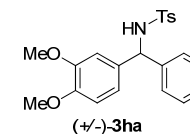

Data File C:\CHEM32\1\DATA\ZHOU-14\YZN005564.D  
 Sample Name: XG-3-15A

```

=====
Acq. Operator   : Z
Acq. Instrument : Instrument 1          Location : Vial 1
Injection Date  : 7/17/2014 6:22:48 PM
Acq. Method     : C:\CHEM32\1\METHODS\DEF.LC.M
Last changed    : 7/17/2014 5:49:32 PM by Z
                  (modified after loading)
Analysis Method : C:\CHEM32\1\METHODS\DEF.LC.M
Last changed    : 10/26/2014 3:23:49 PM by Z
                  (modified after loading)
Sample Info     : OD-H , H/1-PrOH = 80/20, 0.7 mL/min, 30 oC, 230 nm
  
```

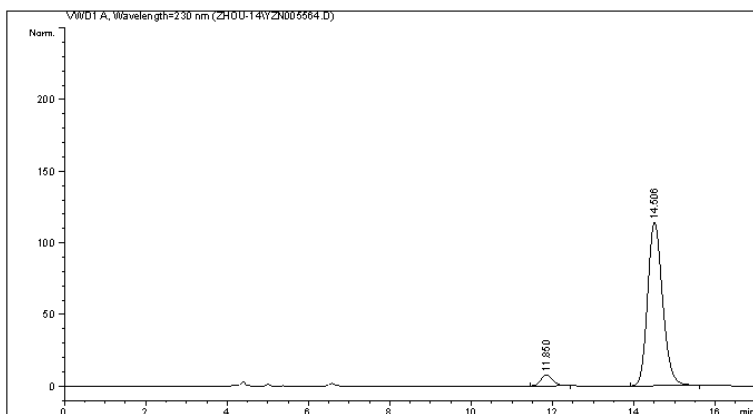

Area Percent Report

```

Sorted By      : Signal
Multiplier:    : 1.0000
Dilution:      : 1.0000
Use Multiplier & Dilution Factor with ISTDs
  
```

Signal 1: VWD1 A, Wavelength=230 nm

| Peak # | RetTime [min] | Type | Width [min] | Area [mAU*s] | Height [mAU] | Area %  |
|--------|---------------|------|-------------|--------------|--------------|---------|
| 1      | 11.850        | EB   | 0.3174      | 160.71346    | 7.80620      | 5.2086  |
| 2      | 14.506        | EB   | 0.3970      | 2924.85498   | 113.96184    | 94.7914 |

Totals : 3085.56844 121.76804

\*\*\* End of Report \*\*\*

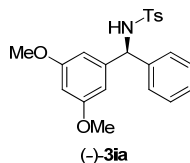

Data File C:\CHEM32\1\DATA\ZHOU-14\YZN005550.D  
 Sample Name: XG-3-15A(+/-)

```

=====
Acq. Operator   : Z
Acq. Instrument : Instrument 1          Location : Vial 1
Injection Date   : 7/16/2014 5:17:52 PM
Acq. Method     : C:\CHEM32\1\METHODS\DEF.LC.M
Last changed    : 7/16/2014 5:14:48 PM by Z
                  (modified after loading)
Analysis Method : C:\CHEM32\1\METHODS\DEF.LC.M
Last changed    : 10/26/2014 3:22:32 PM by Z
                  (modified after loading)
Sample Info     : OD-H , H/1-PrOH = 80/20, 0.7 mL/min, 30 oC, 230 nm
  
```

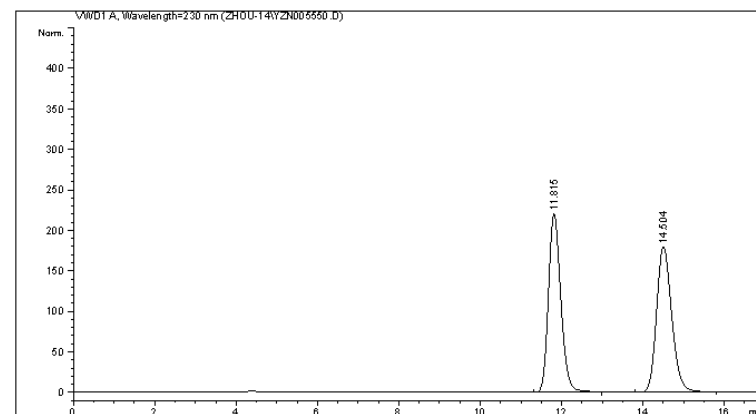

Area Percent Report

```

Sorted By      : Signal
Multiplier:    : 1.0000
Dilution:      : 1.0000
Use Multiplier & Dilution Factor with ISTDs
  
```

Signal 1: VWD1 A, Wavelength=230 nm

| Peak # | RetTime [min] | Type | Width [min] | Area [mAU*s] | Height [mAU] | Area %  |
|--------|---------------|------|-------------|--------------|--------------|---------|
| 1      | 11.815        | EB   | 0.3251      | 4656.75244   | 220.38519    | 50.0335 |
| 2      | 14.504        | VB   | 0.3992      | 4650.51660   | 179.84248    | 49.9665 |

Totals : 9307.26904 400.22768

\*\*\* End of Report \*\*\*

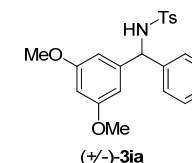

Data File C:\CHEM32\1\DATA\ZHOU-14\YZN005575.D  
 Sample Name: XG-3-15B

=====  
 Acq. Operator : Z  
 Acq. Instrument : Instrument 1 Location : Vial 1  
 Injection Date : 7/18/2014 10:01:27 AM  
 Acq. Method : C:\CHEM32\1\METHODS\DEF.LC.M  
 Last changed : 7/18/2014 9:54:31 AM by Z  
 (modified after loading)  
 Analysis Method : C:\CHEM32\1\METHODS\DEF.LC.M  
 Last changed : 10/26/2014 3:26:29 PM by Z  
 (modified after loading)  
 Sample Info : OD-H, H/1-PrOH = 80/20, 0.7 mL/min, 30 oC, 230 nm

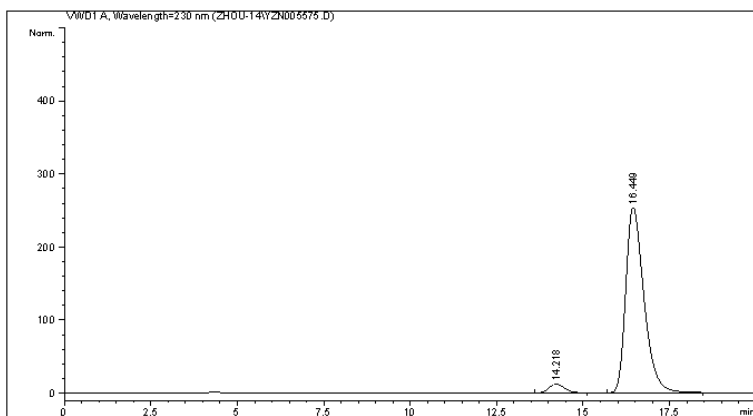

=====  
 Area Percent Report  
 =====

Sorted By : Signal  
 Multiplier: : 1.0000  
 Dilution: : 1.0000  
 Use Multiplier & Dilution Factor with ISTDs

Signal 1: VWD1 A, Wavelength=230 nm

| Peak # | RetTime [min] | Type | Width [min] | Area [mAU*s] | Height [mAU] | Area %  |
|--------|---------------|------|-------------|--------------|--------------|---------|
| 1      | 14.218        | VB   | 0.4881      | 384.30466    | 12.20865     | 3.9633  |
| 2      | 16.449        | EB   | 0.5616      | 9312.31348   | 254.06387    | 96.0367 |

Totals : 9696.61813 266.27252

=====  
 \*\*\* End of Report \*\*\*

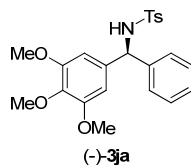

Data File C:\CHEM32\1\DATA\ZHOU-14\YZN005551.D  
 Sample Name: XG-3-15B(+/-)

=====  
 Acq. Operator : Z  
 Acq. Instrument : Instrument 1 Location : Vial 1  
 Injection Date : 7/16/2014 5:52:11 PM  
 Acq. Method : C:\CHEM32\1\METHODS\DEF.LC.M  
 Last changed : 7/16/2014 5:48:12 PM by Z  
 (modified after loading)  
 Analysis Method : C:\CHEM32\1\METHODS\DEF.LC.M  
 Last changed : 10/26/2014 3:25:08 PM by Z  
 (modified after loading)  
 Sample Info : OD-H, H/1-PrOH = 80/20, 0.7 mL/min, 30 oC, 230 nm

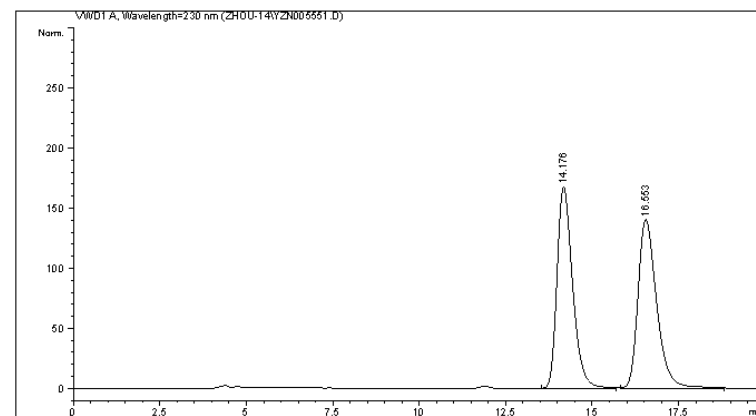

=====  
 Area Percent Report  
 =====

Sorted By : Signal  
 Multiplier: : 1.0000  
 Dilution: : 1.0000  
 Use Multiplier & Dilution Factor with ISTDs

Signal 1: VWD1 A, Wavelength=230 nm

| Peak # | RetTime [min] | Type | Width [min] | Area [mAU*s] | Height [mAU] | Area %  |
|--------|---------------|------|-------------|--------------|--------------|---------|
| 1      | 14.176        | BB   | 0.4788      | 5247.18164   | 167.60249    | 49.9465 |
| 2      | 16.553        | BB   | 0.5740      | 5258.43018   | 140.34819    | 50.0535 |

Totals : 1.05056e4 307.95068

=====  
 \*\*\* End of Report \*\*\*

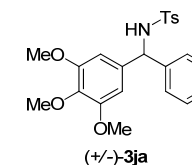



Data File C:\CHEM32\1\DATA\ZHOU-14\YZN005569.D  
 Sample Name: XG-3-16B

```

=====
Acq. Operator   : Z
Acq. Instrument : Instrument 1          Location : Vial 1
Injection Date  : 7/17/2014 9:11:52 PM
Acq. Method     : C:\CHEM32\1\METHODS\DEF LC.M
Last changed    : 7/17/2014 9:09:48 PM by Z
                  (modified after loading)
Analysis Method : C:\CHEM32\1\METHODS\DEF LC.M
Last changed    : 10/26/2014 3:29:18 PM by Z
                  (modified after loading)
Sample Info     : OD-H , H/1-PrOH = 80/20, 0.7 mL/min, 30 oC, 230 nm
=====
  
```

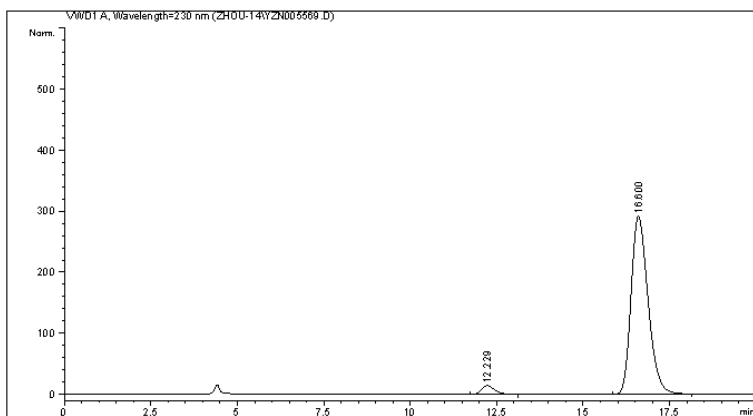

Area Percent Report

```

Sorted By      : Signal
Multiplier:    : 1.0000
Dilution:      : 1.0000
Use Multiplier & Dilution Factor with ISTDs
  
```

Signal 1: VWD1 A, Wavelength=230 nm

| Peak # | RetTime [min] | Type | Width [min] | Area [mAU*s] | Height [mAU] | Area %  |
|--------|---------------|------|-------------|--------------|--------------|---------|
| 1      | 12.229        | BB   | 0.4148      | 386.63855    | 14.21762     | 3.7121  |
| 2      | 16.600        | BB   | 0.5306      | 1.00290e4    | 291.73975    | 96.2879 |

Totals : 1.04156e4 305.95737

\*\*\* End of Report \*\*\*

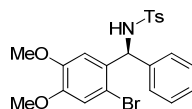

(-)-3ka

Data File C:\CHEM32\1\DATA\ZHOU-14\YZN005473.D  
 Sample Name: XG-3-2C(+/-)

```

=====
Acq. Operator   : Z
Acq. Instrument : Instrument 1          Location : Vial 1
Injection Date  : 7/7/2014 7:30:33 PM
Acq. Method     : C:\CHEM32\1\METHODS\DEF LC.M
Last changed    : 7/7/2014 6:49:17 PM by Z
                  (modified after loading)
Analysis Method : C:\CHEM32\1\METHODS\DEF LC.M
Last changed    : 10/26/2014 3:28:10 PM by Z
                  (modified after loading)
Sample Info     : OD-H , H/1-PrOH = 80/20, 0.7 mL/min, 30 oC, 230 nm
=====
  
```

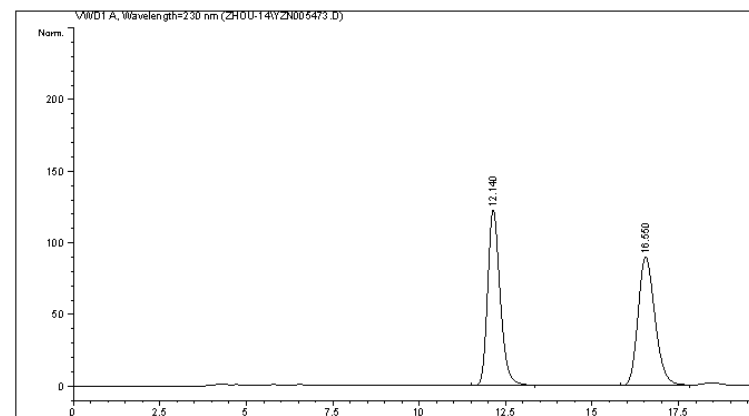

Area Percent Report

```

Sorted By      : Signal
Multiplier:    : 1.0000
Dilution:      : 1.0000
Use Multiplier & Dilution Factor with ISTDs
  
```

Signal 1: VWD1 A, Wavelength=230 nm

| Peak # | RetTime [min] | Type | Width [min] | Area [mAU*s] | Height [mAU] | Area %  |
|--------|---------------|------|-------------|--------------|--------------|---------|
| 1      | 12.140        | VB   | 0.3862      | 3075.40430   | 122.44308    | 49.9693 |
| 2      | 16.550        | BB   | 0.5294      | 3079.18628   | 89.84679     | 50.0307 |

Totals : 6154.59058 212.28987

\*\*\* End of Report \*\*\*

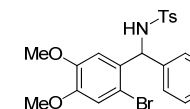

(+/-)-3ka

Data File C:\CHEM32\1\DATA\ZHOU-14\YZN005544.D  
 Sample Name: XG-3-12C

```

=====
Acq. Operator   : Z
Acq. Instrument : Instrument 1          Location : Vial 1
Injection Date  : 7/16/2014 11:08:58 AM
Acq. Method    : C:\CHEM32\1\METHODS\DEF.LC.M
Last changed   : 7/16/2014 11:05:58 AM by Z
                (modified after loading)
Analysis Method: C:\CHEM32\1\METHODS\DEF.LC.M
Last changed   : 10/25/2015 9:21:21 PM
                (modified after loading)
Sample Info    : OD-H, H/i-PrOH = 80/20, 0.7 mL/min, 30 oC, 230 nm
=====
  
```

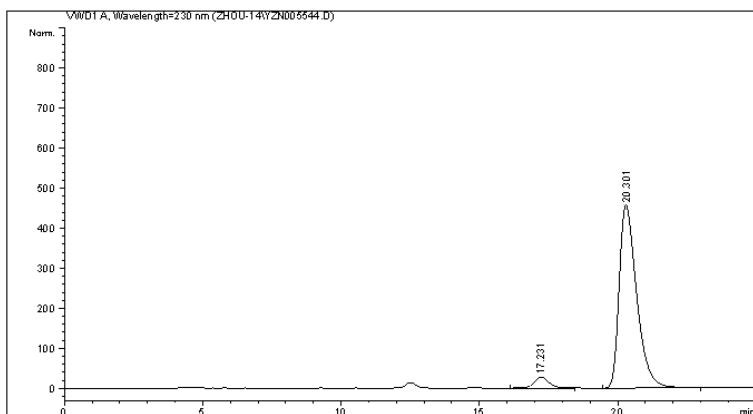

Area Percent Report

```

Sorted By      : Signal
Multiplier:    : 1.0000
Dilution:      : 1.0000
Use Multiplier & Dilution Factor with ISTDs
  
```

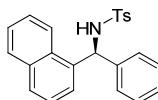

(S)-31a

Signal 1: VWD1 A, Wavelength=230 nm

| Peak # | RetTime [min] | Type | Width [min] | Area [mAU*s] | Height [mAU] | Area %  |
|--------|---------------|------|-------------|--------------|--------------|---------|
| 1      | 17.231        | BB   | 0.5768      | 1045.30579   | 27.53718     | 4.9490  |
| 2      | 20.301        | BB   | 0.6719      | 2.00762e4    | 456.38904    | 95.0510 |

Totals : 2.11215e4 483.92622

\*\*\* End of Report \*\*\*

Data File C:\CHEM32\1\DATA\ZHOU-14\YZN005443.D  
 Sample Name: XG-3-2E(+/-)

```

=====
Acq. Operator   : Z
Acq. Instrument : Instrument 1          Location : Vial 1
Injection Date  : 7/3/2014 11:04:40 AM
Acq. Method    : C:\CHEM32\1\METHODS\DEF.LC.M
Last changed   : 7/3/2014 10:22:21 AM by Z
                (modified after loading)
Analysis Method: C:\CHEM32\1\METHODS\DEF.LC.M
Last changed   : 10/26/2014 3:14:03 PM by Z
                (modified after loading)
Sample Info    : OD-H, H/i-PrOH = 80/20, 0.7 mL/min, 30 oC, 230 nm
=====
  
```

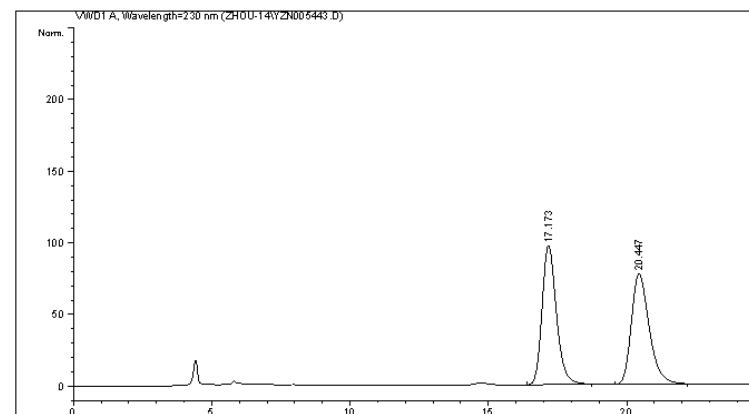

Area Percent Report

```

Sorted By      : Signal
Multiplier:    : 1.0000
Dilution:      : 1.0000
Use Multiplier & Dilution Factor with ISTDs
  
```

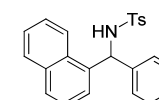

(+/-)-31a

Signal 1: VWD1 A, Wavelength=230 nm

| Peak # | RetTime [min] | Type | Width [min] | Area [mAU*s] | Height [mAU] | Area %  |
|--------|---------------|------|-------------|--------------|--------------|---------|
| 1      | 17.173        | BB   | 0.5525      | 3500.22754   | 97.21790     | 50.2653 |
| 2      | 20.447        | BB   | 0.6836      | 3463.27783   | 77.18501     | 49.7347 |

Totals : 6963.50537 174.40290

\*\*\* End of Report \*\*\*

Data File C:\CHEM32\1\DATA\ZHOU-14\YZN005640.D  
 Sample Name: XG-3-18A

```

=====
Acq. Operator   : Z
Acq. Instrument : Instrument 1          Location : Vial 1
Injection Date  : 7/23/2014 10:37:59 AM
Acq. Method     : C:\CHEM32\1\METHODS\DEF.LC.M
Last changed    : 7/23/2014 10:07:16 AM by Z
                  (modified after loading)
Analysis Method : C:\CHEM32\1\METHODS\DEF.LC.M
Last changed    : 10/26/2014 3:37:14 PM by Z
                  (modified after loading)
Sample Info     : OD-H , H/1-PrOH = 80/20, 0.7 mL/min, 30 oC, 230 nm
  
```

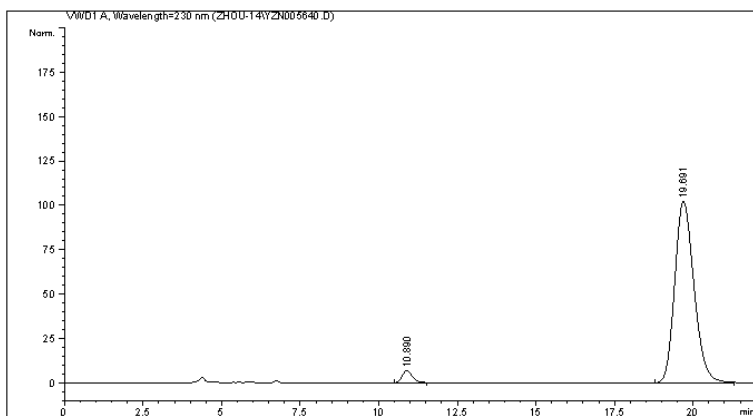

Area Percent Report

```

Sorted By      : Signal
Multiplier:    : 1.0000
Dilution:      : 1.0000
Use Multiplier & Dilution Factor with ISTDs
  
```

Signal 1: VWD1 A, Wavelength=230 nm

| Peak # | RetTime [min] | Type | Width [min] | Area [mAU*s] | Height [mAU] | Area %  |
|--------|---------------|------|-------------|--------------|--------------|---------|
| 1      | 10.890        | BB   | 0.3426      | 155.02534    | 6.96692      | 3.4294  |
| 2      | 19.691        | BB   | 0.6593      | 4365.46729   | 102.32998    | 96.5706 |

Totals : 4520.49263 109.29690

\*\*\* End of Report \*\*\*

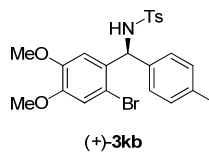

Data File C:\CHEM32\1\DATA\ZHOU-14\YZN005631.D  
 Sample Name: XG-3-18A(+/-)

```

=====
Acq. Operator   : Z
Acq. Instrument : Instrument 1          Location : Vial 1
Injection Date   : 7/22/2014 2:41:00 PM
Acq. Method     : C:\CHEM32\1\METHODS\DEF.LC.M
Last changed    : 7/22/2014 2:23:57 PM by Z
                  (modified after loading)
Analysis Method : C:\CHEM32\1\METHODS\DEF.LC.M
Last changed    : 10/26/2014 3:37:14 PM by Z
                  (modified after loading)
Sample Info     : OD-H , H/1-PrOH = 80/20, 0.7 mL/min, 30 oC, 230 nm
  
```

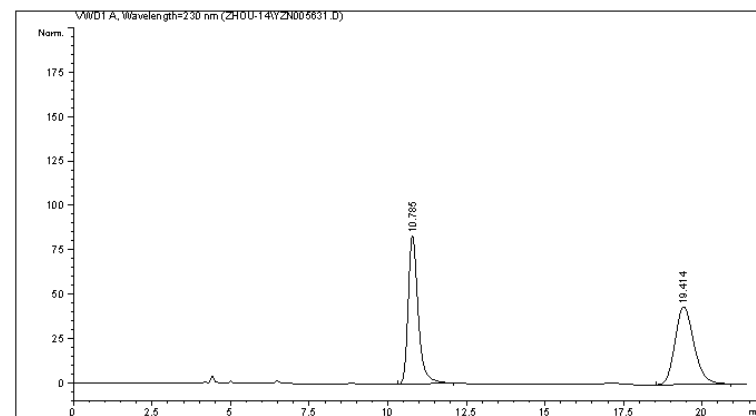

Area Percent Report

```

Sorted By      : Signal
Multiplier:    : 1.0000
Dilution:      : 1.0000
Use Multiplier & Dilution Factor with ISTDs
  
```

Signal 1: VWD1 A, Wavelength=230 nm

| Peak # | RetTime [min] | Type | Width [min] | Area [mAU*s] | Height [mAU] | Area %  |
|--------|---------------|------|-------------|--------------|--------------|---------|
| 1      | 10.785        | BB   | 0.3357      | 1840.04651   | 83.50512     | 49.9792 |
| 2      | 19.414        | BB   | 0.6461      | 1841.57776   | 43.82162     | 50.0208 |

Totals : 3681.62427 127.32674

\*\*\* End of Report \*\*\*

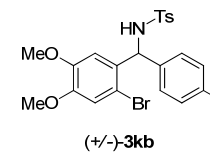

Data File C:\CHEM32\1\DATA\ZHOU-14\YZN005733.D  
 Sample Name: XG-3-19E

=====  
 Acq. Operator : Z  
 Acq. Instrument : Instrument 1 Location : Vial 1  
 Injection Date : 7/26/2014 9:08:21 PM  
 Acq. Method : C:\CHEM32\1\METHODS\DEF LC.M  
 Last changed : 7/26/2014 8:51:16 PM by Z  
 (modified after loading)  
 Analysis Method : C:\CHEM32\1\METHODS\DEF LC.M  
 Last changed : 10/26/2014 3:48:45 PM by Z  
 (modified after loading)  
 Sample Info : OD-H , H/i-PrOH = 90/10, 1.0 mL/min, 30 oC, 230 nm

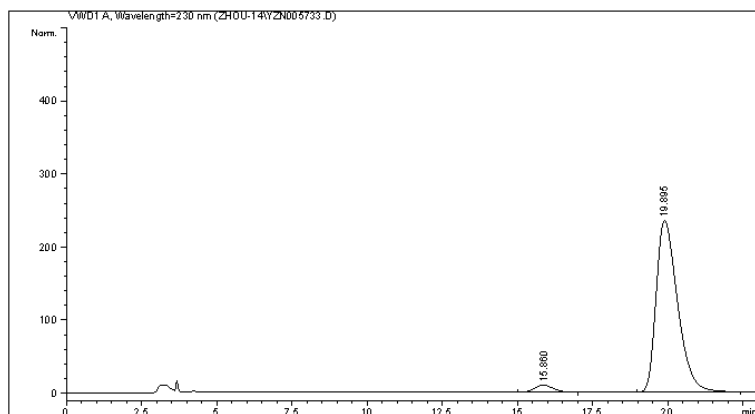

=====  
 Area Percent Report  
 =====

Sorted By : Signal  
 Multiplier: : 1.0000  
 Dilution: : 1.0000  
 Use Multiplier & Dilution Factor with ISTDs

Signal 1: VWD1 A, Wavelength=230 nm

| Peak # | RetTime [min] | Type | Width [min] | Area mAU  | Height [mAU] | Area %  |
|--------|---------------|------|-------------|-----------|--------------|---------|
| 1      | 15.860        | BB   | 0.6578      | 428.59454 | 9.95981      | 3.5433  |
| 2      | 19.895        | BB   | 0.7621      | 1.16673e4 | 235.22879    | 96.4567 |

Totals : 1.20959e4 245.18860

=====  
 \*\*\* End of Report \*\*\*

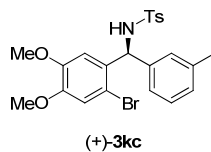

Data File C:\CHEM32\1\DATA\ZHOU-14\YZN005745.D  
 Sample Name: XG-3-19E(+/-)

=====  
 Acq. Operator : Z  
 Acq. Instrument : Instrument 1 Location : Vial 1  
 Injection Date : 7/27/2014 3:14:34 PM  
 Acq. Method : C:\CHEM32\1\METHODS\DEF LC.M  
 Last changed : 7/27/2014 3:04:54 PM by Z  
 (modified after loading)  
 Analysis Method : C:\CHEM32\1\METHODS\DEF LC.M  
 Last changed : 10/26/2014 3:47:35 PM by Z  
 (modified after loading)  
 Sample Info : OD-H , H/i-PrOH = 70/30, 0.7 mL/min, 30 oC, 230 nm

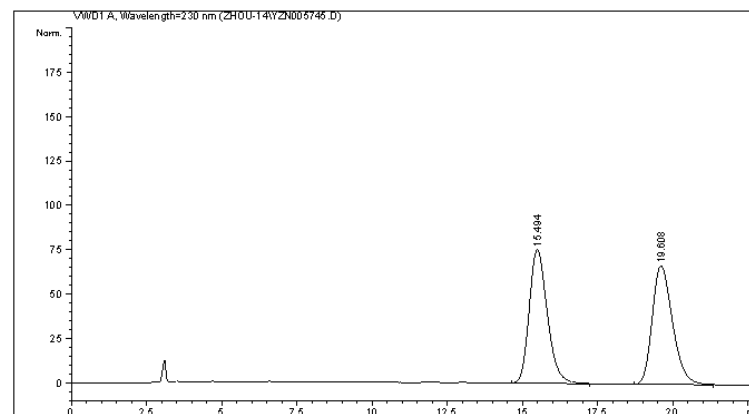

=====  
 Area Percent Report  
 =====

Sorted By : Signal  
 Multiplier: : 1.0000  
 Dilution: : 1.0000  
 Use Multiplier & Dilution Factor with ISTDs

Signal 1: VWD1 A, Wavelength=230 nm

| Peak # | RetTime [min] | Type | Width [min] | Area mAU   | Height [mAU] | Area %  |
|--------|---------------|------|-------------|------------|--------------|---------|
| 1      | 15.494        | BB   | 0.6457      | 3153.64478 | 75.32347     | 50.0773 |
| 2      | 19.608        | BB   | 0.7245      | 3143.90552 | 66.89845     | 49.9227 |

Totals : 6297.55029 142.22192

=====  
 \*\*\* End of Report \*\*\*

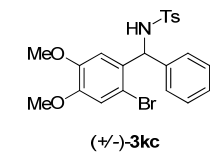

Data File C:\CHEM32\1\DATA\ZHOU-14\Y2006463.D  
 Sample Name: XG-3-19F

=====  
 Acq. Operator : ZHOU  
 Acq. Instrument : Instrument 1 Location : Vial 1  
 Injection Date : 8/2/2014 8:17:27 AM  
 Acq. Method : C:\HPCHEM\1\METHODS\DEF.LC1.M  
 Last changed : 8/2/2014 8:05:33 AM by ZHOU  
 (modified after loading)  
 Analysis Method : C:\CHEM32\1\METHODS\DEF.LC.M  
 Last changed : 10/26/2014 4:14:39 PM by Z  
 (modified after loading)  
 Sample Info : IA, H/1-PrOH = 85/15, 1.0 mL/min, 30 oC, 230 nm

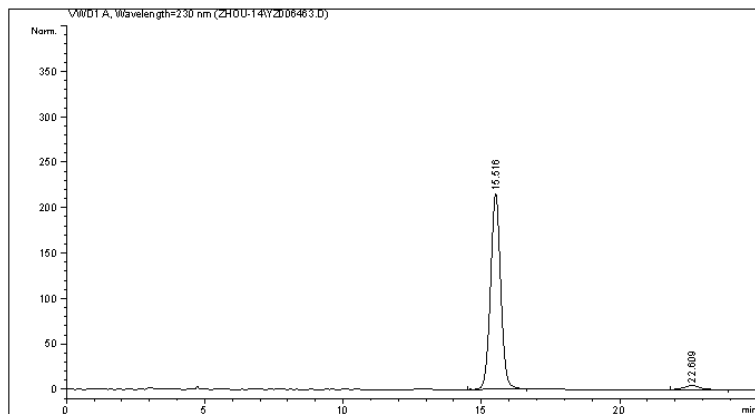

=====  
 Area Percent Report  
 =====

Sorted By : Signal  
 Multiplier: : 1.0000  
 Dilution: : 1.0000  
 Use Multiplier & Dilution Factor with ISTDs

Signal 1: VWD1 A, Wavelength=230 nm

| Peak # | RetTime [min] | Type | Width [min] | Area [mAU*s] | Height [mAU] | Area %  |
|--------|---------------|------|-------------|--------------|--------------|---------|
| 1      | 15.516        | BB   | 0.3917      | 5503.13721   | 215.08493    | 97.0054 |
| 2      | 22.609        | BB   | 0.5790      | 169.88359    | 4.43910      | 2.9946  |

Totals : 5673.02080 219.52403

=====  
 \*\*\* End of Report \*\*\*

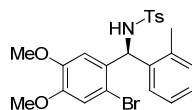

(+)-3kd

Data File C:\CHEM32\1\DATA\ZHOU-14\Y2006464.D  
 Sample Name: XG-3-19F(+)

=====  
 Acq. Operator : ZHOU  
 Acq. Instrument : Instrument 1 Location : Vial 1  
 Injection Date : 8/2/2014 8:46:05 AM  
 Acq. Method : C:\HPCHEM\1\METHODS\DEF.LC1.M  
 Last changed : 8/2/2014 8:42:52 AM by ZHOU  
 (modified after loading)  
 Analysis Method : C:\CHEM32\1\METHODS\DEF.LC.M  
 Last changed : 10/26/2014 4:12:44 PM by Z  
 (modified after loading)  
 Sample Info : IA, H/1-PrOH = 85/15, 1.0 mL/min, 30 oC, 230 nm

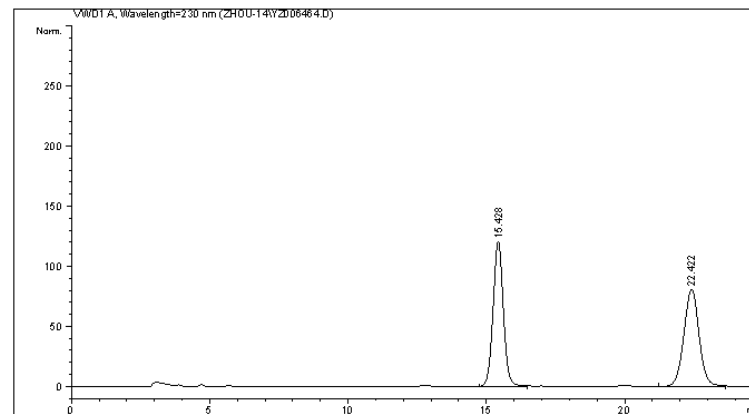

=====  
 Area Percent Report  
 =====

Sorted By : Signal  
 Multiplier: : 1.0000  
 Dilution: : 1.0000  
 Use Multiplier & Dilution Factor with ISTDs

Signal 1: VWD1 A, Wavelength=230 nm

| Peak # | RetTime [min] | Type | Width [min] | Area [mAU*s] | Height [mAU] | Area %  |
|--------|---------------|------|-------------|--------------|--------------|---------|
| 1      | 15.428        | BB   | 0.3981      | 3100.12427   | 120.34335    | 50.2629 |
| 2      | 22.422        | VB   | 0.5905      | 3067.69287   | 80.71541     | 49.7371 |

Totals : 6167.81714 201.05876

=====  
 \*\*\* End of Report \*\*\*

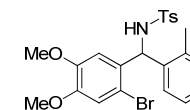

(+/-)-3kd

Data File C:\CHEM32\1\DATA\ZHOU-14\YZN005676.D  
 Sample Name: XG-3-18B1

=====  
 Acq. Operator : Z  
 Acq. Instrument : Instrument 1 Location : Vial 1  
 Injection Date : 7/24/2014 6:36:39 PM  
 Acq. Method : C:\CHEM32\1\METHODS\DEF.LC.M  
 Last changed : 7/24/2014 6:08:08 PM by Z  
 (modified after loading)  
 Analysis Method : C:\CHEM32\1\METHODS\DEF.LC.M  
 Last changed : 10/25/2015 9:47:32 PM  
 (modified after loading)  
 Sample Info : OD-H, H/1-PrOH = 70/30, 0.70 mL/min, 30 oC, 230 nm

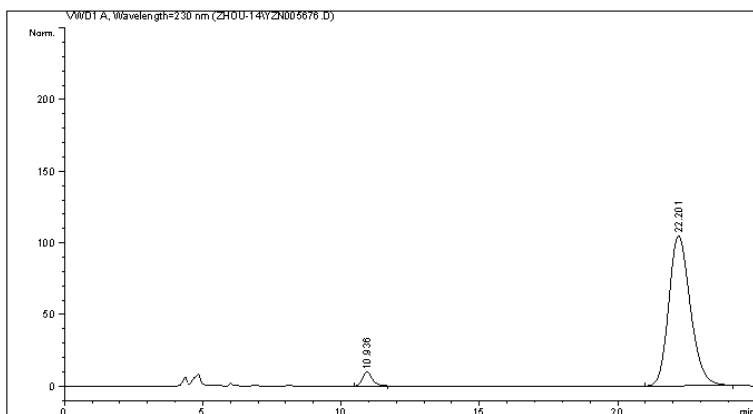

=====  
 Area Percent Report  
 =====

Sorted By : Signal  
 Multiplier: : 1.0000  
 Dilution: : 1.0000  
 Use Multiplier & Dilution Factor with ISTDs

Signal 1: VWD1 A, Wavelength=230 nm

| Peak # | RetTime [min] | Type | Width [min] | Area [mAU*s] | Height [mAU] | Area %  |
|--------|---------------|------|-------------|--------------|--------------|---------|
| 1      | 10.936        | BB   | 0.3840      | 236.17111    | 9.52361      | 3.9942  |
| 2      | 22.201        | BB   | 0.8326      | 5676.60645   | 104.84789    | 96.0058 |

Totals : 5912.77756 114.37151

=====  
 \*\*\* End of Report \*\*\*

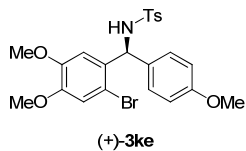

Data File C:\CHEM32\1\DATA\ZHOU-14\YZN005638.D  
 Sample Name: XG-3-18B(+/-)

=====  
 Acq. Operator : Z  
 Acq. Instrument : Instrument 1 Location : Vial 1  
 Injection Date : 7/23/2014 9:07:19 AM  
 Acq. Method : C:\CHEM32\1\METHODS\DEF.LC.M  
 Last changed : 7/23/2014 8:38:08 AM by Z  
 (modified after loading)  
 Analysis Method : C:\CHEM32\1\METHODS\DEF.LC.M  
 Last changed : 10/26/2014 3:39:38 PM by Z  
 (modified after loading)  
 Sample Info : OD-H, H/1-PrOH = 70/30, 0.7 mL/min, 30 oC, 230 nm

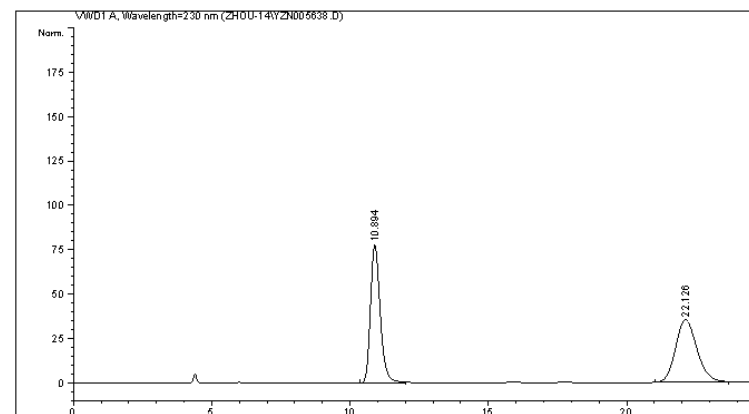

=====  
 Area Percent Report  
 =====

Sorted By : Signal  
 Multiplier: : 1.0000  
 Dilution: : 1.0000  
 Use Multiplier & Dilution Factor with ISTDs

Signal 1: VWD1 A, Wavelength=230 nm

| Peak # | RetTime [min] | Type | Width [min] | Area [mAU*s] | Height [mAU] | Area %  |
|--------|---------------|------|-------------|--------------|--------------|---------|
| 1      | 10.894        | BB   | 0.3734      | 1895.38916   | 77.69145     | 50.1635 |
| 2      | 22.126        | BB   | 0.8281      | 1883.03259   | 35.10719     | 49.8365 |

Totals : 3778.42175 112.79865

=====  
 \*\*\* End of Report \*\*\*

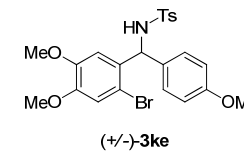

Data File C:\CHEM32\1\DATA\ZHOU-14\YZN005734.D  
 Sample Name: XG-3-19G

```

=====
Acq. Operator   : Z
Acq. Instrument : Instrument 1          Location : Vial 1
Injection Date  : 7/26/2014 9:41:03 PM
Acq. Method     : C:\CHEM32\1\METHODS\DEF.LC.M
Last changed    : 7/26/2014 9:31:20 PM by Z
                  (modified after loading)
Analysis Method : C:\CHEM32\1\METHODS\DEF.LC.M
Last changed    : 10/26/2014 3:51:39 PM by Z
                  (modified after loading)
Sample Info     : OD-H , H/1-PrOH = 90/10, 1.0 mL/min, 30 oC, 230 nm
=====
  
```

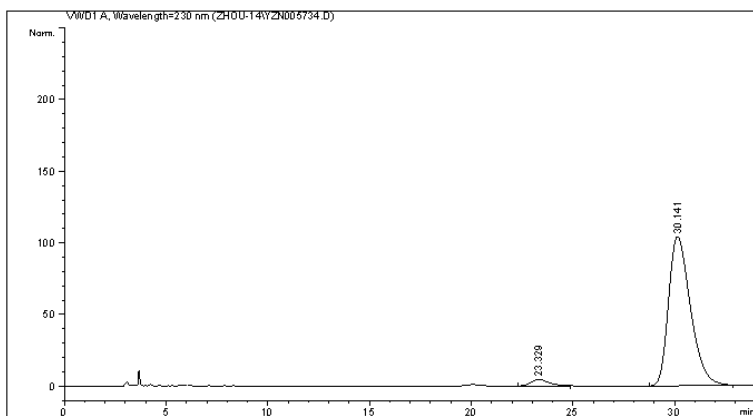

Area Percent Report

```

Sorted By      : Signal
Multiplier:    : 1.0000
Dilution:      : 1.0000
Use Multiplier & Dilution Factor with ISTDs
  
```

Signal 1: VWD1 A, Wavelength=230 nm

| Peak # | RetTime [min] | Type | Width [min] | Area [mAU*s] | Height [mAU] | Area %  |
|--------|---------------|------|-------------|--------------|--------------|---------|
| 1      | 23.329        | BB   | 0.8833      | 281.59406    | 4.46246      | 3.4813  |
| 2      | 30.141        | BB   | 1.1468      | 7807.20264   | 104.15491    | 96.5187 |

Totals : 8088.79669 108.61738

\*\*\* End of Report \*\*\*

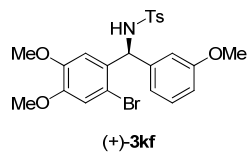

Data File C:\CHEM32\1\DATA\ZHOU-14\YZN005683.D  
 Sample Name: XG-3-19G(+/-)

```

=====
Acq. Operator   : Z
Acq. Instrument : Instrument 1          Location : Vial 1
Injection Date   : 7/24/2014 9:55:24 PM
Acq. Method     : C:\CHEM32\1\METHODS\DEF.LC.M
Last changed    : 7/24/2014 9:47:46 PM by Z
                  (modified after loading)
Analysis Method : C:\CHEM32\1\METHODS\DEF.LC.M
Last changed    : 10/26/2014 3:50:11 PM by Z
                  (modified after loading)
Sample Info     : OD-H , H/1-PrOH = 90/10, 1.0 mL/min, 30 oC, 230 nm
=====
  
```

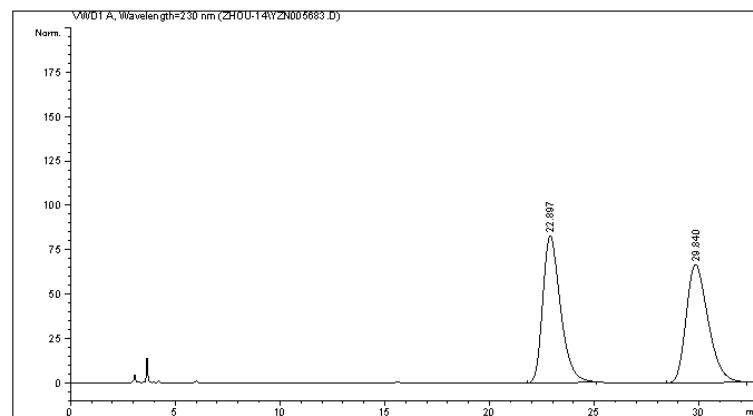

Area Percent Report

```

Sorted By      : Signal
Multiplier:    : 1.0000
Dilution:      : 1.0000
Use Multiplier & Dilution Factor with ISTDs
  
```

Signal 1: VWD1 A, Wavelength=230 nm

| Peak # | RetTime [min] | Type | Width [min] | Area [mAU*s] | Height [mAU] | Area %  |
|--------|---------------|------|-------------|--------------|--------------|---------|
| 1      | 22.897        | BB   | 0.9021      | 4880.71729   | 82.92573     | 50.1546 |
| 2      | 29.840        | BB   | 1.1217      | 4850.62598   | 66.73828     | 49.8454 |

Totals : 9731.34326 149.66401

\*\*\* End of Report \*\*\*

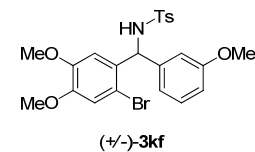

Data File C:\CHEM32\1\DATA\ZHOU-14\YZN005735.D  
 Sample Name: XG-3-20H

=====  
 Acq. Operator : Z  
 Acq. Instrument : Instrument 1 Location : Vial 1  
 Injection Date : 7/26/2014 10:41:06 PM  
 Acq. Method : C:\CHEM32\1\METHODS\DEF.LC.M  
 Last changed : 7/26/2014 10:16:29 PM by Z  
 (modified after loading)  
 Analysis Method : C:\CHEM32\1\METHODS\DEF.LC.M  
 Last changed : 10/26/2014 3:53:08 PM by Z  
 (modified after loading)  
 Sample Info : OD-H, H/1-PrOH = 70/30, 0.7 mL/min, 30 oC, 230 nm

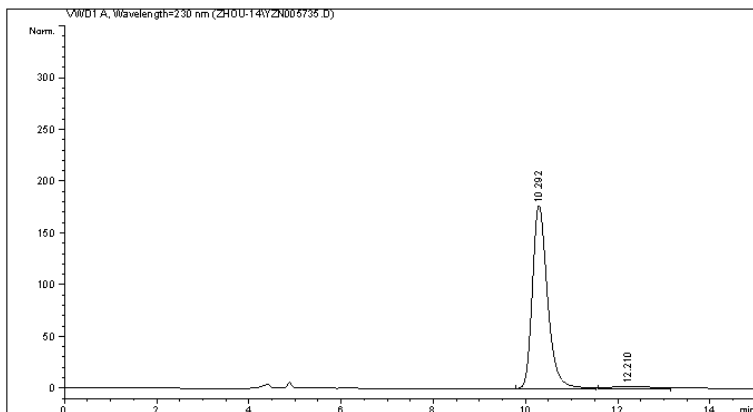

=====  
 Area Percent Report  
 =====

Sorted By : Signal  
 Multiplier: : 1.0000  
 Dilution: : 1.0000  
 Use Multiplier & Dilution Factor with ISTDs

Signal 1: VWD1 A, Wavelength=230 nm

| Peak # | RetTime [min] | Type | Width [min] | Area [mAU*s] | Height [mAU] | Area %  |
|--------|---------------|------|-------------|--------------|--------------|---------|
| 1      | 10.292        | EB   | 0.3472      | 4025.69067   | 176.79790    | 96.7903 |
| 2      | 12.210        | EB   | 0.8002      | 133.49887    | 2.30730      | 3.2097  |

Totals : 4159.18954 179.10520

=====  
 \*\*\* End of Report \*\*\*

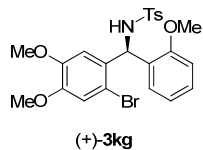

Data File C:\CHEM32\1\DATA\ZHOU-14\YZN005650.D  
 Sample Name: XG-3-20H(+/-)

=====  
 Acq. Operator : Z  
 Acq. Instrument : Instrument 1 Location : Vial 1  
 Injection Date : 7/23/2014 9:14:19 PM  
 Acq. Method : C:\CHEM32\1\METHODS\DEF.LC.M  
 Last changed : 7/23/2014 9:11:30 PM by Z  
 (modified after loading)  
 Analysis Method : C:\CHEM32\1\METHODS\DEF.LC.M  
 Last changed : 10/26/2014 3:53:08 PM by Z  
 (modified after loading)  
 Sample Info : OD-H, H/1-PrOH = 70/30, 0.7 mL/min, 30 oC, 230 nm

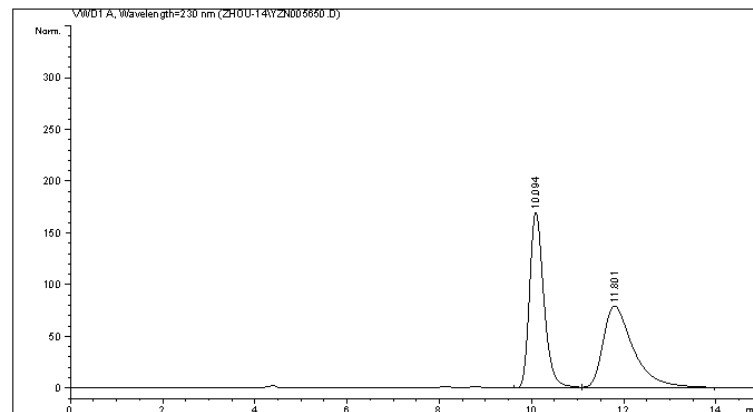

=====  
 Area Percent Report  
 =====

Sorted By : Signal  
 Multiplier: : 1.0000  
 Dilution: : 1.0000  
 Use Multiplier & Dilution Factor with ISTDs

Signal 1: VWD1 A, Wavelength=230 nm

| Peak # | RetTime [min] | Type | Width [min] | Area [mAU*s] | Height [mAU] | Area %  |
|--------|---------------|------|-------------|--------------|--------------|---------|
| 1      | 10.094        | EB   | 0.3308      | 3678.03589   | 170.14691    | 50.4532 |
| 2      | 11.801        | VB   | 0.6823      | 3611.96021   | 79.16192     | 49.5468 |

Totals : 7289.99609 249.30883

=====  
 \*\*\* End of Report \*\*\*

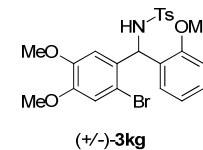



Data File C:\CHEM32\1\DATA\ZHOU-14\YZN005876.D  
 Sample Name: XG-3-18C

=====  
 Acq. Operator : Z  
 Acq. Instrument : Instrument 1 Location : Vial 1  
 Injection Date : 8/22/2014 3:48:19 PM  
 Acq. Method : C:\CHEM32\1\METHODS\DEF.LC.M  
 Last changed : 8/22/2014 3:45:08 PM by Z  
 (modified after loading)  
 Analysis Method : C:\CHEM32\1\METHODS\DEF.LC.M  
 Last changed : 10/26/2014 3:43:25 PM by Z  
 (modified after loading)  
 Sample Info : OD-H, H/i-PrOH = 70/30, 0.7 mL/min, 30 oC, 230 nm

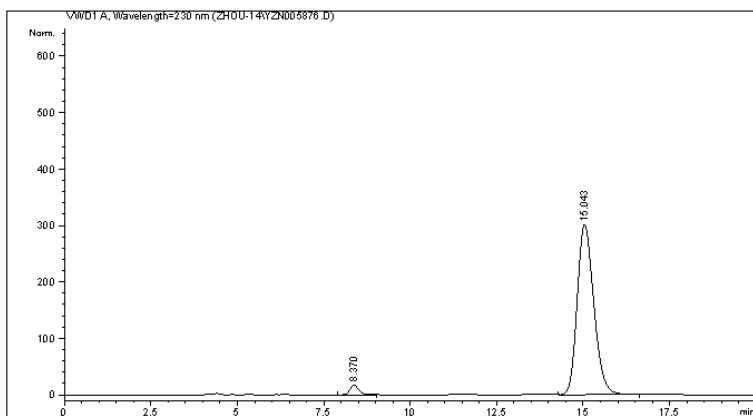

=====  
 Area Percent Report  
 =====

Sorted By : Signal  
 Multiplier: : 1.0000  
 Dilution: : 1.0000  
 Use Multiplier & Dilution Factor with ISTDs

Signal 1: VWD1 A, Wavelength=230 nm

| Peak # | RetTime [min] | Type | Width [min] | Area [mAU*s] | Height [mAU] | Area %  |
|--------|---------------|------|-------------|--------------|--------------|---------|
| 1      | 8.370         | BB   | 0.2716      | 306.70395    | 17.24198     | 2.9535  |
| 2      | 15.043        | VB   | 0.5170      | 1.00776e4    | 301.20364    | 97.0465 |

Totals : 1.03843e4 318.44562

=====  
 \*\*\* End of Report \*\*\*

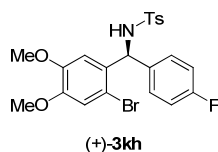

Data File C:\CHEM32\1\DATA\ZHOU-14\YZN005875.D  
 Sample Name: XG-3-18C(+/-)

=====  
 Acq. Operator : Z  
 Acq. Instrument : Instrument 1 Location : Vial 1  
 Injection Date : 8/22/2014 3:19:56 PM  
 Acq. Method : C:\CHEM32\1\METHODS\DEF.LC.M  
 Last changed : 8/22/2014 3:01:13 PM by Z  
 (modified after loading)  
 Analysis Method : C:\CHEM32\1\METHODS\DEF.LC.M  
 Last changed : 10/26/2014 3:42:10 PM by Z  
 (modified after loading)  
 Sample Info : OD-H, H/i-PrOH = 70/30, 0.7 mL/min, 30 oC, 230 nm

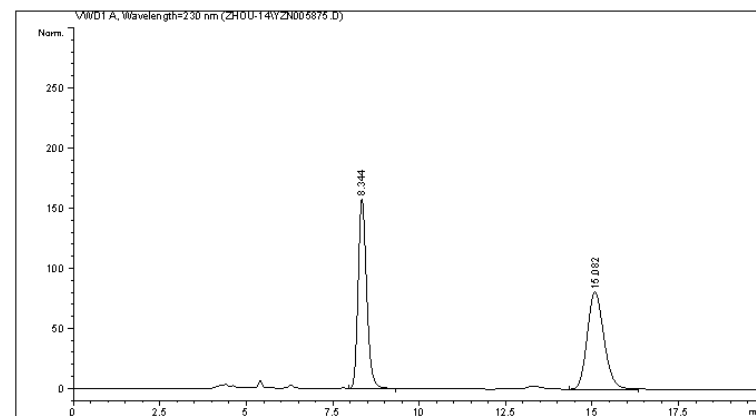

=====  
 Area Percent Report  
 =====

Sorted By : Signal  
 Multiplier: : 1.0000  
 Dilution: : 1.0000  
 Use Multiplier & Dilution Factor with ISTDs

Signal 1: VWD1 A, Wavelength=230 nm

| Peak # | RetTime [min] | Type | Width [min] | Area [mAU*s] | Height [mAU] | Area %  |
|--------|---------------|------|-------------|--------------|--------------|---------|
| 1      | 8.344         | VB   | 0.2631      | 2714.34180   | 157.96738    | 49.9776 |
| 2      | 15.082        | BB   | 0.5189      | 2716.76978   | 80.80166     | 50.0224 |

Totals : 5431.11157 238.76904

=====  
 \*\*\* End of Report \*\*\*

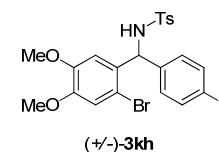

Data File C:\CHEM32\1\DATA\ZHOU-14\YZN005730.D  
 Sample Name: XG-3-19D

=====  
 Acq. Operator : Z  
 Acq. Instrument : Instrument 1 Location : Vial 1  
 Injection Date : 7/26/2014 7:28:01 PM  
 Acq. Method : C:\CHEM32\1\METHODS\DEF LC.M  
 Last changed : 7/26/2014 7:24:48 PM by Z  
 (modified after loading)  
 Analysis Method : C:\CHEM32\1\METHODS\DEF LC.M  
 Last changed : 10/26/2014 3:46:04 PM by Z  
 (modified after loading)  
 Sample Info : OD-H , H/1-PrOH = 70/30, 0.7 mL/min, 30 oC, 230 nm

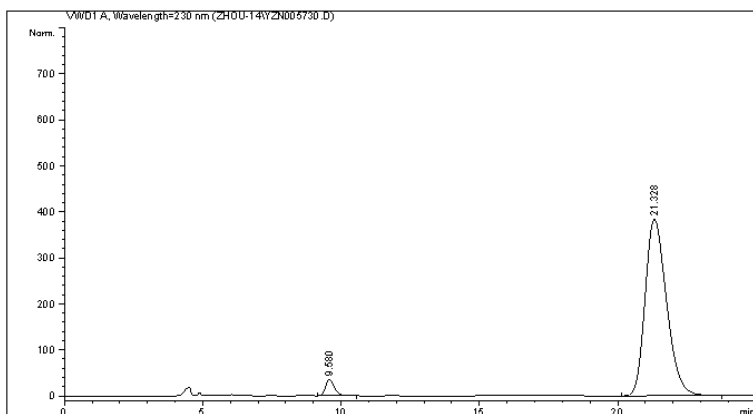

=====  
 Area Percent Report  
 =====

Sorted By : Signal  
 Multiplier: : 1.0000  
 Dilution: : 1.0000  
 Use Multiplier & Dilution Factor with ISTDs

Signal 1: VWD1 A, Wavelength=230 nm

| Peak # | RetTime [min] | Type | Width [min] | Area [mAU *s] | Height [mAU] | Area %  |
|--------|---------------|------|-------------|---------------|--------------|---------|
| 1      | 9.580         | EB   | 0.3427      | 805.05560     | 35.96141     | 3.7392  |
| 2      | 21.328        | EB   | 0.8381      | 2.07249e4     | 383.85754    | 96.2608 |

Totals : 2.15300e4 419.81896

=====  
 \*\*\* End of Report \*\*\*

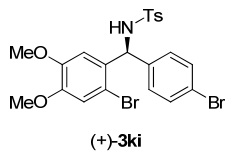

Data File C:\CHEM32\1\DATA\ZHOU-14\YZN005743.D  
 Sample Name: XG-3-19D(+/-)

=====  
 Acq. Operator : Z  
 Acq. Instrument : Instrument 1 Location : Vial 1  
 Injection Date : 7/27/2014 2:13:48 PM  
 Acq. Method : C:\CHEM32\1\METHODS\DEF LC.M  
 Last changed : 7/27/2014 2:10:11 PM by Z  
 (modified after loading)  
 Analysis Method : C:\CHEM32\1\METHODS\DEF LC.M  
 Last changed : 10/26/2014 3:45:00 PM by Z  
 (modified after loading)  
 Sample Info : OD-H , H/1-PrOH = 70/30, 0.7 mL/min, 30 oC, 230 nm

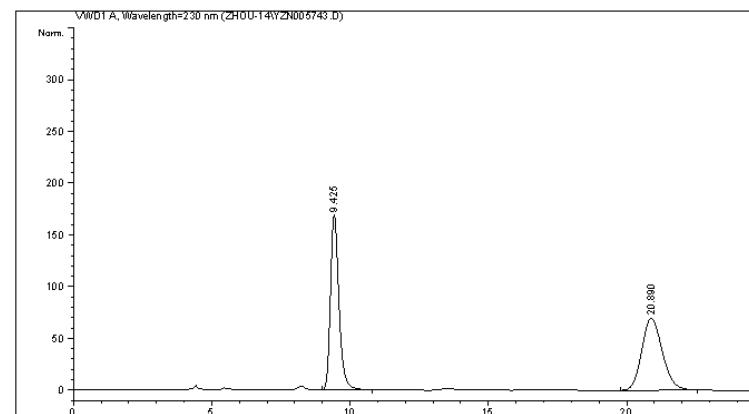

=====  
 Area Percent Report  
 =====

Sorted By : Signal  
 Multiplier: : 1.0000  
 Dilution: : 1.0000  
 Use Multiplier & Dilution Factor with ISTDs

Signal 1: VWD1 A, Wavelength=230 nm

| Peak # | RetTime [min] | Type | Width [min] | Area [mAU *s] | Height [mAU] | Area %  |
|--------|---------------|------|-------------|---------------|--------------|---------|
| 1      | 9.425         | VB   | 0.3266      | 3613.43042    | 169.01599    | 50.0399 |
| 2      | 20.890        | BB   | 0.7956      | 3607.66357    | 69.74969     | 49.9601 |

Totals : 7221.09399 238.76568

=====  
 \*\*\* End of Report \*\*\*

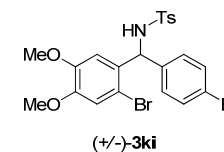

Data File C:\CHEM32\1\DATA\ZHOU-14\Y2006429.D  
 Sample Name: XG-3-20J

=====  
 Acq. Operator : ZHOU  
 Acq. Instrument : Instrument 1 Location : Vial 1  
 Injection Date : 7/27/2014 1:42:28 PM  
 Acq. Method : C:\HPCHEM\1\METHODS\DEF LC1.M  
 Last changed : 7/27/2014 1:28:41 PM by ZHOU  
 (modified after loading)  
 Analysis Method : C:\CHEM32\1\METHODS\DEF LC.M  
 Last changed : 10/26/2014 4:17:03 PM by Z  
 (modified after loading)  
 Sample Info : IA, H/i-PrOH = 80/20, 1.0 mL/min, 30 oC, 230 nm

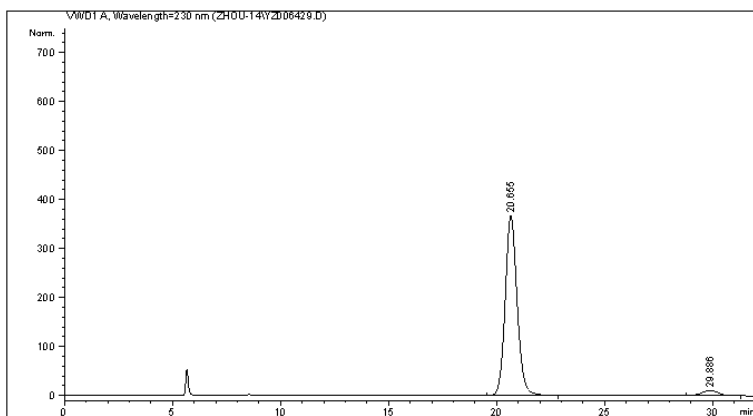

=====  
 Area Percent Report  
 =====

Sorted By : Signal  
 Multiplier: : 1.0000  
 Dilution: : 1.0000  
 Use Multiplier & Dilution Factor with ISTDs

Signal 1: VWD1 A, Wavelength=230 nm

| Peak # | RetTime [min] | Type | Width [min] | Area [mAU *s] | Height [mAU] | Area %  |
|--------|---------------|------|-------------|---------------|--------------|---------|
| 1      | 20.655        | EB   | 0.5840      | 1.41074e4     | 366.86124    | 96.0850 |
| 2      | 29.886        | EB   | 0.7908      | 574.80951     | 10.83477     | 3.9150  |

Totals : 1.46822e4 377.69600

=====  
 \*\*\* End of Report \*\*\*

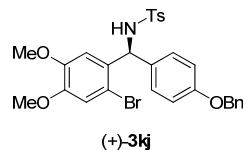

Data File C:\CHEM32\1\DATA\ZHOU-14\Y2006384.D  
 Sample Name: XG-3-20J(+/-)

=====  
 Acq. Operator : ZHOU  
 Acq. Instrument : Instrument 1 Location : Vial 1  
 Injection Date : 7/25/2014 12:50:28 PM  
 Acq. Method : C:\HPCHEM\1\METHODS\DEF LC1.M  
 Last changed : 7/25/2014 12:39:41 PM by ZHOU  
 (modified after loading)  
 Analysis Method : C:\CHEM32\1\METHODS\DEF LC.M  
 Last changed : 10/26/2014 4:24:52 PM by Z  
 (modified after loading)  
 Sample Info : IA, H/i-PrOH = 80/20, 1.0 mL/min, 30 oC, 230 nm

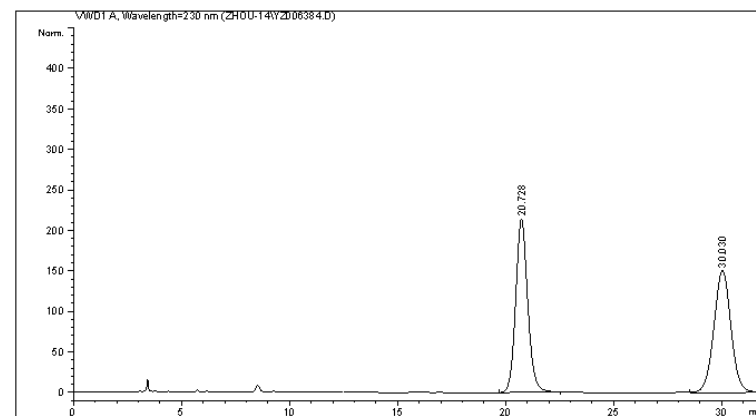

=====  
 Area Percent Report  
 =====

Sorted By : Signal  
 Multiplier: : 1.0000  
 Dilution: : 1.0000  
 Use Multiplier & Dilution Factor with ISTDs

Signal 1: VWD1 A, Wavelength=230 nm

| Peak # | RetTime [min] | Type | Width [min] | Area [mAU *s] | Height [mAU] | Area %  |
|--------|---------------|------|-------------|---------------|--------------|---------|
| 1      | 20.728        | EB   | 0.5900      | 8304.26563    | 213.80824    | 50.1225 |
| 2      | 30.030        | VB   | 0.8453      | 8263.66016    | 150.28954    | 49.8775 |

Totals : 1.65679e4 364.09778

=====  
 \*\*\* End of Report \*\*\*

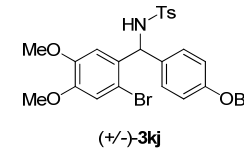

Data File C:\CHEM32\1\DATA\ZHOU-14\YZN005778.D  
 Sample Name: XG-3-20K

=====  
 Acq. Operator : Z  
 Acq. Instrument : Instrument 1 Location : Vial 1  
 Injection Date : 7/30/2014 3:29:00 PM  
 Acq. Method : C:\CHEM32\1\METHODS\DEF.LC.M  
 Last changed : 7/30/2014 3:24:30 PM by Z  
 (modified after loading)  
 Analysis Method : C:\CHEM32\1\METHODS\DEF.LC.M  
 Last changed : 10/26/2014 3:56:44 PM by Z  
 (modified after loading)  
 Sample Info : OD-H, H/1-PrOH = 70/30 0.7 mL/min, 30 oC, 230 nm

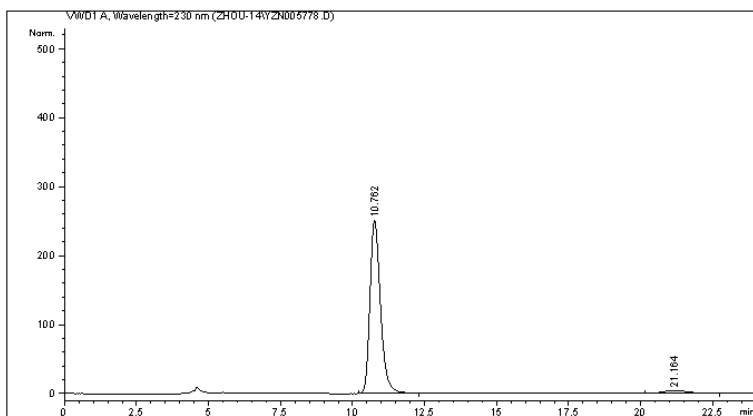

=====  
 Area Percent Report  
 =====

Sorted By : Signal  
 Multiplier: : 1.0000  
 Dilution: : 1.0000  
 Use Multiplier & Dilution Factor with ISTDs

Signal 1: VWD1 A, Wavelength=230 nm

| Peak # | RetTime [min] | Type | Width [min] | Area [mAU*s] | Height [mAU] | Area %  |
|--------|---------------|------|-------------|--------------|--------------|---------|
| 1      | 10.762        | BB   | 0.3907      | 6400.00586   | 250.98370    | 96.0820 |
| 2      | 21.164        | BB   | 0.9075      | 260.97815    | 4.25665      | 3.9180  |

Totals : 6660.98401 255.24036

=====  
 \*\*\* End of Report \*\*\*

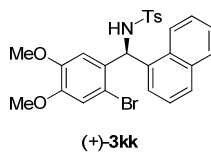

Data File C:\CHEM32\1\DATA\ZHOU-14\YZN005741.D  
 Sample Name: XG-3-18C(+/-)

=====  
 Acq. Operator : Z  
 Acq. Instrument : Instrument 1 Location : Vial 1  
 Injection Date : 7/27/2014 1:22:01 PM  
 Acq. Method : C:\CHEM32\1\METHODS\DEF.LC.M  
 Last changed : 7/27/2014 1:01:48 PM by Z  
 (modified after loading)  
 Analysis Method : C:\CHEM32\1\METHODS\DEF.LC.M  
 Last changed : 10/26/2014 3:55:37 PM by Z  
 (modified after loading)  
 Sample Info : OD-H, H/1-PrOH = 70/30, 0.7 mL/min, 30 oC, 230 nm

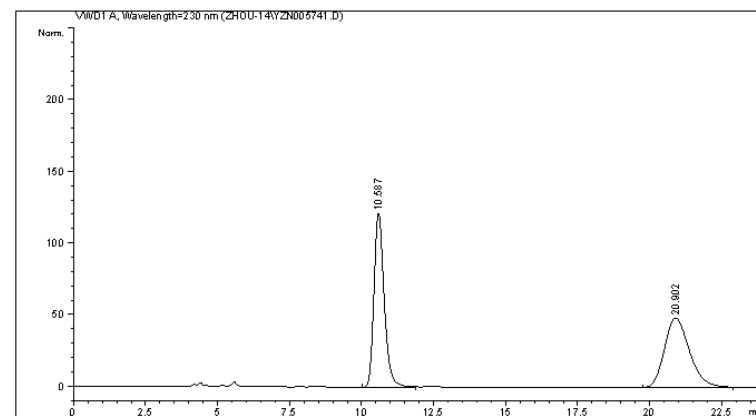

=====  
 Area Percent Report  
 =====

Sorted By : Signal  
 Multiplier: : 1.0000  
 Dilution: : 1.0000  
 Use Multiplier & Dilution Factor with ISTDs

Signal 1: VWD1 A, Wavelength=230 nm

| Peak # | RetTime [min] | Type | Width [min] | Area [mAU*s] | Height [mAU] | Area %  |
|--------|---------------|------|-------------|--------------|--------------|---------|
| 1      | 10.587        | BB   | 0.3783      | 2998.15332   | 121.45504    | 50.5055 |
| 2      | 20.902        | BB   | 0.9365      | 2938.13599   | 48.52050     | 49.4945 |

Totals : 5936.28931 169.97554

=====  
 \*\*\* End of Report \*\*\*

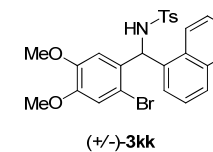

Data File C:\CHEM32\1\DATA\ZHOU-14\YZN005798.D  
 Sample Name: XG-3-22B

=====  
 Acq. Operator : Z  
 Acq. Instrument : Instrument 1 Location : Vial 1  
 Injection Date : 8/1/2014 10:02:00 AM  
 Acq. Method : C:\CHEM32\1\METHODS\DEF.LC.M  
 Last changed : 8/1/2014 10:01:16 AM by Z  
 (modified after loading)  
 Analysis Method : C:\CHEM32\1\METHODS\DEF.LC.M  
 Last changed : 10/26/2014 3:59:57 PM by Z  
 (modified after loading)  
 Sample Info : OD-H , H/1-PrOH = 80/20, 0.7 mL/min, 30 oC, 230 nm

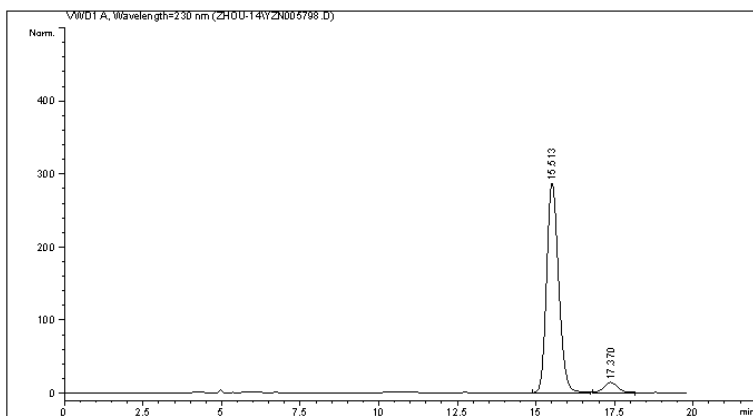

=====  
 Area Percent Report  
 =====

Sorted By : Signal  
 Multiplier: : 1.0000  
 Dilution: : 1.0000  
 Use Multiplier & Dilution Factor with ISTDs

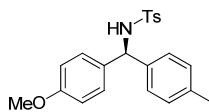

(S)-3db

Signal 1: VWD1 A, Wavelength=230 nm

| Peak # | RetTime [min] | Type | Width [min] | Area [mAU*s] | Height [mAU] | Area %  |
|--------|---------------|------|-------------|--------------|--------------|---------|
| 1      | 15.513        | BB   | 0.4128      | 7644.81934   | 286.86798    | 94.7655 |
| 2      | 17.370        | BB   | 0.4710      | 422.26831    | 14.00966     | 5.2345  |

Totals : 8067.08765 300.87764

=====  
 \*\*\* End of Report \*\*\*

Data File C:\CHEM32\1\DATA\ZHOU-14\YZN005754.D  
 Sample Name: XG-3-22B(+/-)

=====  
 Acq. Operator : Z  
 Acq. Instrument : Instrument 1 Location : Vial 1  
 Injection Date : 7/28/2014 9:58:01 PM  
 Acq. Method : C:\CHEM32\1\METHODS\DEF.LC.M  
 Last changed : 7/28/2014 9:55:27 PM by Z  
 (modified after loading)  
 Analysis Method : C:\CHEM32\1\METHODS\DEF.LC.M  
 Last changed : 10/26/2014 3:59:57 PM by Z  
 (modified after loading)  
 Sample Info : OD-H , H/1-PrOH = 80/20, 0.7 mL/min, 30 oC, 230 nm

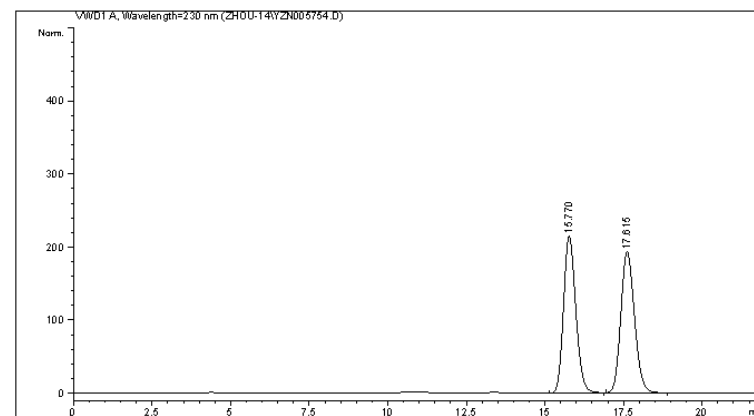

=====  
 Area Percent Report  
 =====

Sorted By : Signal  
 Multiplier: : 1.0000  
 Dilution: : 1.0000  
 Use Multiplier & Dilution Factor with ISTDs

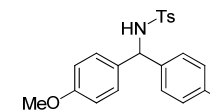

(+/-)-3db

Signal 1: VWD1 A, Wavelength=230 nm

| Peak # | RetTime [min] | Type | Width [min] | Area [mAU*s] | Height [mAU] | Area %  |
|--------|---------------|------|-------------|--------------|--------------|---------|
| 1      | 15.770        | BB   | 0.4225      | 5844.70410   | 214.65431    | 49.9712 |
| 2      | 17.615        | BB   | 0.4703      | 5851.44141   | 192.94443    | 50.0288 |

Totals : 1.16961e4 407.59874

=====  
 \*\*\* End of Report \*\*\*

Data File C:\CHEM32\1\DATA\ZHOU-14\YZN005830.D  
 Sample Name: XG-3-22A

=====  
 Acq. Operator : Z  
 Acq. Instrument : Instrument 1 Location : Vial 1  
 Injection Date : 8/15/2014 9:24:50 AM  
 Acq. Method : C:\CHEM32\1\METHODS\DEF LC.M  
 Last changed : 8/15/2014 8:50:02 AM by Z  
 (modified after loading)  
 Analysis Method : C:\CHEM32\1\METHODS\DEF LC.M  
 Last changed : 10/26/2014 3:58:45 PM by Z  
 (modified after loading)  
 Sample Info : OD-H, H/i-PrOH = 80/20, 0.7 mL/min, 30 oC, 230 nm

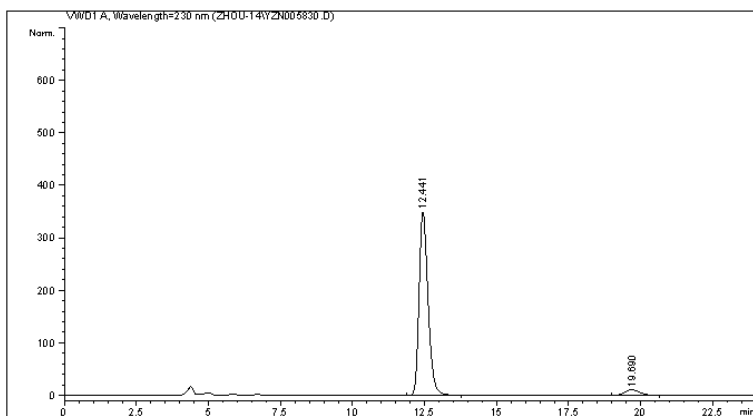

=====  
 Area Percent Report  
 =====

Sorted By : Signal  
 Multiplier: : 1.0000  
 Dilution: : 1.0000  
 Use Multiplier & Dilution Factor with ISTDs

Signal 1: VWD1 A, Wavelength=230 nm

| Peak # | RetTime [min] | Type | Width [min] | Area [mAU *s] | Height [mAU] | Area %  |
|--------|---------------|------|-------------|---------------|--------------|---------|
| 1      | 12.441        | VB   | 0.3331      | 7582.75342    | 349.67377    | 95.1173 |
| 2      | 19.690        | EB   | 0.5625      | 389.24573     | 10.74280     | 4.8827  |

Totals : 7971.99915 360.41657

=====  
 \*\*\* End of Report \*\*\*

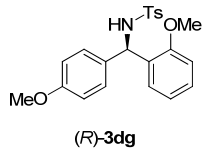

Data File C:\CHEM32\1\DATA\ZHOU-14\YZN005753.D  
 Sample Name: XG-3-22A(+/-)

=====  
 Acq. Operator : Z  
 Acq. Instrument : Instrument 1 Location : Vial 1  
 Injection Date : 7/28/2014 9:20:51 PM  
 Acq. Method : C:\CHEM32\1\METHODS\DEF LC.M  
 Last changed : 7/28/2014 9:12:23 PM by Z  
 (modified after loading)  
 Analysis Method : C:\CHEM32\1\METHODS\DEF LC.M  
 Last changed : 10/26/2014 3:56:44 PM by Z  
 (modified after loading)  
 Sample Info : OD-H, H/i-PrOH = 80/20, 0.7 mL/min, 30 oC, 230 nm

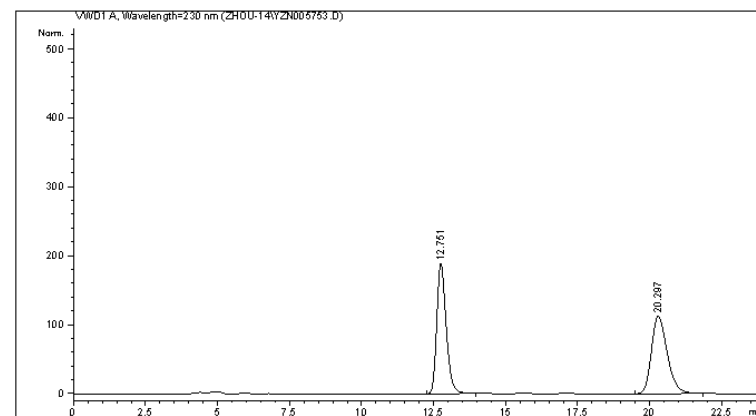

=====  
 Area Percent Report  
 =====

Sorted By : Signal  
 Multiplier: : 1.0000  
 Dilution: : 1.0000  
 Use Multiplier & Dilution Factor with ISTDs

Signal 1: VWD1 A, Wavelength=230 nm

| Peak # | RetTime [min] | Type | Width [min] | Area [mAU *s] | Height [mAU] | Area %  |
|--------|---------------|------|-------------|---------------|--------------|---------|
| 1      | 12.751        | BB   | 0.3484      | 4285.79199    | 188.41444    | 50.0584 |
| 2      | 20.297        | BB   | 0.5857      | 4275.79492    | 112.60605    | 49.9416 |

Totals : 8561.58691 301.02049

=====  
 \*\*\* End of Report \*\*\*

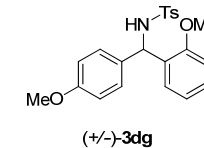

Data File C:\CHEM32\1\DATA\ZHOU-14\Y2006462.D  
 Sample Name: XG-3-23B

=====  
 Acq. Operator : ZHOU  
 Acq. Instrument : Instrument 1 Location : Vial 1  
 Injection Date : 8/2/2014 7:19:47 AM  
 Acq. Method : C:\HPCHEM\1\METHODS\DEF LC1.M  
 Last changed : 8/2/2014 7:16:22 AM by ZHOU  
 (modified after loading)  
 Analysis Method : C:\CHEM32\1\METHODS\DEF LC.M  
 Last changed : 10/26/2014 4:22:12 PM by Z  
 (modified after loading)  
 Sample Info : IA, H/i-PrOH = 90/10, 1.0 mL/min, 30 oC, 230 nm

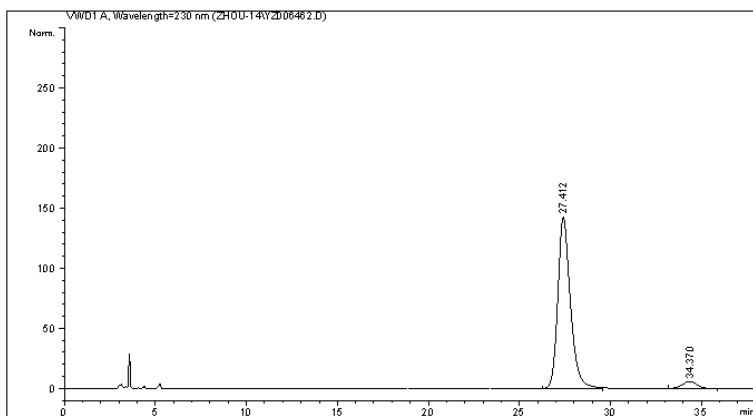

=====  
 Area Percent Report  
 =====

Sorted By : Signal  
 Multiplier: : 1.0000  
 Dilution: : 1.0000  
 Use Multiplier & Dilution Factor with ISTDs

Signal 1: VWD1 A, Wavelength=230 nm

| Peak # | RetTime [min] | Type | Width [min] | Area [mAU*s] | Height [mAU] | Area %  |
|--------|---------------|------|-------------|--------------|--------------|---------|
| 1      | 27.412        | BB   | 0.7149      | 6810.91553   | 142.48419    | 95.2230 |
| 2      | 34.370        | BB   | 0.8415      | 341.68216    | 5.95242      | 4.7770  |

Totals : 7152.59769 148.43661

=====  
 \*\*\* End of Report \*\*\*

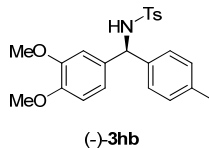

Data File C:\CHEM32\1\DATA\ZHOU-14\Y2006446.D  
 Sample Name: XG-3-23b(+/-)

=====  
 Acq. Operator : ZHOU  
 Acq. Instrument : Instrument 1 Location : Vial 1  
 Injection Date : 7/30/2014 2:22:13 AM  
 Acq. Method : C:\HPCHEM\1\METHODS\DEF LC1.M  
 Last changed : 7/30/2014 2:15:24 AM by ZHOU  
 (modified after loading)  
 Analysis Method : C:\CHEM32\1\METHODS\DEF LC.M  
 Last changed : 10/26/2014 4:21:05 PM by Z  
 (modified after loading)  
 Sample Info : IA, H/i-PrOH = 90/10, 1.0 mL/min, 30 oC, 230 nm

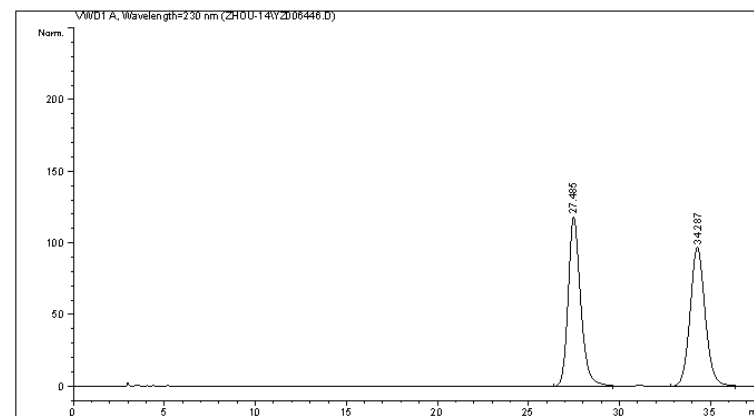

=====  
 Area Percent Report  
 =====

Sorted By : Signal  
 Multiplier: : 1.0000  
 Dilution: : 1.0000  
 Use Multiplier & Dilution Factor with ISTDs

Signal 1: VWD1 A, Wavelength=230 nm

| Peak # | RetTime [min] | Type | Width [min] | Area [mAU*s] | Height [mAU] | Area %  |
|--------|---------------|------|-------------|--------------|--------------|---------|
| 1      | 27.485        | BB   | 0.7146      | 5618.24219   | 118.21407    | 50.2146 |
| 2      | 34.287        | BB   | 0.8794      | 5570.21777   | 96.82361     | 49.7854 |

Totals : 1.11885e4 215.03767

=====  
 \*\*\* End of Report \*\*\*

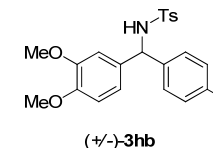

Data File C:\CHEM32\1\DATA\ZHOU-14\Y2006465.D  
 Sample Name: XG-3-23A

```

=====
Acq. Operator   : ZHOU
Acq. Instrument : Instrument 1          Location : Vial 1
Injection Date  : 8/2/2014 9:30:32 AM
Acq. Method     : C:\HPCHEM\1\METHODS\DEF LC1.M
Last changed    : 8/2/2014 9:15:18 AM by ZHOU
                  (modified after loading)
Analysis Method : C:\CHEM32\1\METHODS\DEF LC.M
Last changed    : 10/26/2014 4:19:51 PM by Z
                  (modified after loading)
Sample Info     : IA, H/i-PrOH = 80/20, 1.0 mL/min, 30 oC, 230 nm
=====
  
```

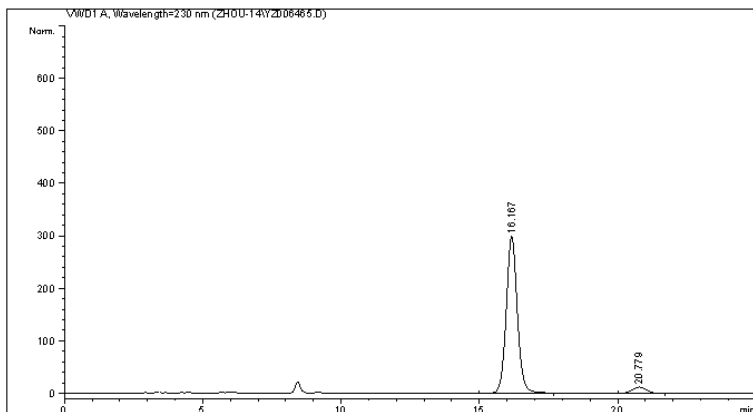

Area Percent Report

```

Sorted By      : Signal
Multiplier:    : 1.0000
Dilution:      : 1.0000
Use Multiplier & Dilution Factor with ISTDs
  
```

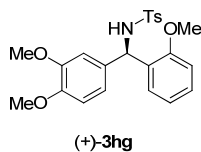

Signal 1: VWD1 A, Wavelength=230 nm

| Peak # | RetTime [min] | Type | Width [min] | Area [mAU*s] | Height [mAU] | Area %  |
|--------|---------------|------|-------------|--------------|--------------|---------|
| 1      | 16.167        | BB   | 0.4232      | 8301.06836   | 298.75171    | 95.1609 |
| 2      | 20.779        | BB   | 0.5479      | 422.12491    | 11.77357     | 4.8391  |

Totals : 8723.19327 310.52528

\*\*\* End of Report \*\*\*

Data File C:\CHEM32\1\DATA\ZHOU-14\Y2006445.D  
 Sample Name: XG-3-23A(+/-)

```

=====
Acq. Operator   : ZHOU
Acq. Instrument : Instrument 1          Location : Vial 1
Injection Date  : 7/30/2014 1:49:57 AM
Acq. Method     : C:\HPCHEM\1\METHODS\DEF LC1.M
Last changed    : 7/30/2014 1:47:42 AM by ZHOU
                  (modified after loading)
Analysis Method : C:\CHEM32\1\METHODS\DEF LC.M
Last changed    : 10/26/2014 4:18:27 PM by Z
                  (modified after loading)
Sample Info     : IA, H/i-PrOH = 80/20, 1.0 mL/min, 30 oC, 230 nm
=====
  
```

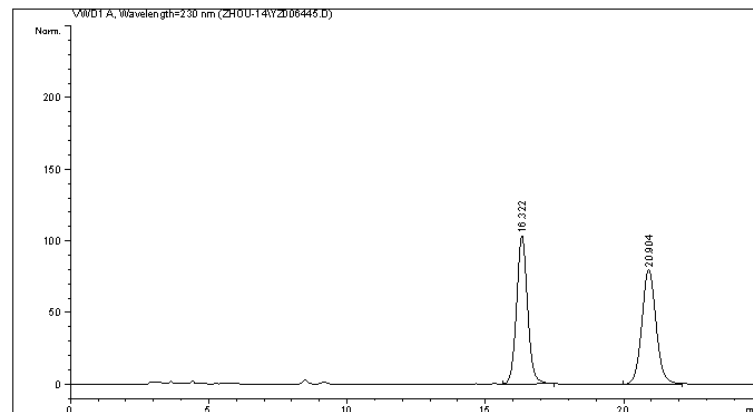

Area Percent Report

```

Sorted By      : Signal
Multiplier:    : 1.0000
Dilution:      : 1.0000
Use Multiplier & Dilution Factor with ISTDs
  
```

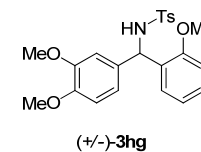

Signal 1: VWD1 A, Wavelength=230 nm

| Peak # | RetTime [min] | Type | Width [min] | Area [mAU*s] | Height [mAU] | Area %  |
|--------|---------------|------|-------------|--------------|--------------|---------|
| 1      | 16.322        | BB   | 0.4206      | 2852.52686   | 103.49867    | 49.9489 |
| 2      | 20.904        | BB   | 0.5493      | 2858.35791   | 79.72751     | 50.0511 |

Totals : 5710.88477 183.22618

\*\*\* End of Report \*\*\*



Data File C:\CHEM32\1\DATA\ZHOU-14\YZN005797.D  
 Sample Name: XG-3-24B

=====  
 Acq. Operator : Z  
 Acq. Instrument : Instrument 1 Location : Vial 1  
 Injection Date : 8/1/2014 9:34:19 AM  
 Acq. Method : C:\CHEM32\1\METHODS\DEF.LC.M  
 Last changed : 8/1/2014 9:07:07 AM by Z  
 (modified after loading)  
 Analysis Method : C:\CHEM32\1\METHODS\DEF.LC.M  
 Last changed : 10/26/2014 4:04:32 PM by Z  
 (modified after loading)  
 Sample Info : OD-H, H/i-PrOH = 80/20, 0.7 mL/min, 30 oC, 230 nm

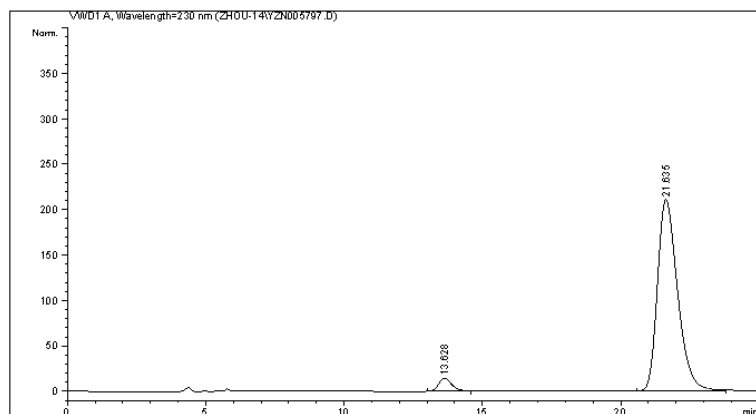

=====  
 Area Percent Report  
 =====

Sorted By : Signal  
 Multiplier: : 1.0000  
 Dilution: : 1.0000  
 Use Multiplier & Dilution Factor with ISTDs

Signal 1: VWD1 A, Wavelength=230 nm

| Peak # | RetTime [min] | Type | Width [min] | Area [mAU*s] | Height [mAU] | Area %  |
|--------|---------------|------|-------------|--------------|--------------|---------|
| 1      | 13.628        | BB   | 0.5052      | 466.29727    | 14.15384     | 4.2254  |
| 2      | 21.635        | BB   | 0.7732      | 1.05694e4    | 210.12764    | 95.7746 |

Totals : 1.10357e4 224.28148

=====  
 \*\*\* End of Report \*\*\*

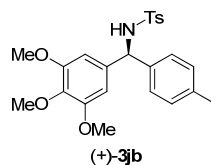

Data File C:\CHEM32\1\DATA\ZHOU-14\YZN005755.D  
 Sample Name: XG-3-24B(+/-)

=====  
 Acq. Operator : Z  
 Acq. Instrument : Instrument 1 Location : Vial 1  
 Injection Date : 7/28/2014 10:27:25 PM  
 Acq. Method : C:\CHEM32\1\METHODS\DEF.LC.M  
 Last changed : 7/28/2014 10:24:54 PM by Z  
 (modified after loading)  
 Analysis Method : C:\CHEM32\1\METHODS\DEF.LC.M  
 Last changed : 10/26/2014 4:04:32 PM by Z  
 (modified after loading)  
 Sample Info : OD-H, H/i-PrOH = 80/20, 0.7 mL/min, 30 oC, 230 nm

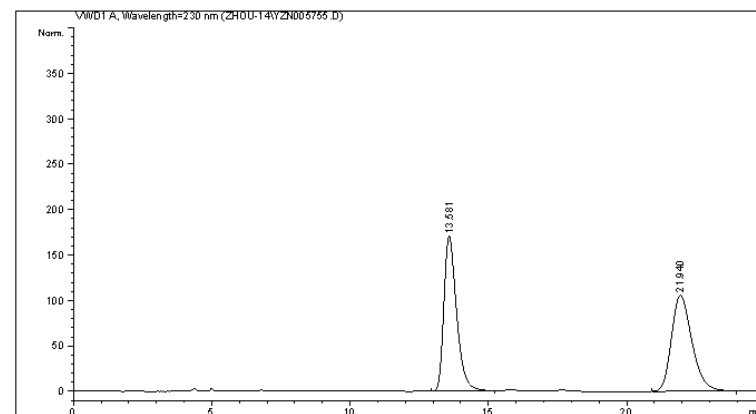

=====  
 Area Percent Report  
 =====

Sorted By : Signal  
 Multiplier: : 1.0000  
 Dilution: : 1.0000  
 Use Multiplier & Dilution Factor with ISTDs

Signal 1: VWD1 A, Wavelength=230 nm

| Peak # | RetTime [min] | Type | Width [min] | Area [mAU*s] | Height [mAU] | Area %  |
|--------|---------------|------|-------------|--------------|--------------|---------|
| 1      | 13.581        | BB   | 0.4886      | 5452.67529   | 170.28455    | 50.0988 |
| 2      | 21.940        | BB   | 0.7894      | 5431.17871   | 105.59211    | 49.9012 |

Totals : 1.08839e4 275.87666

=====  
 \*\*\* End of Report \*\*\*

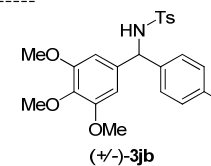

Data File C:\CHEM32\1\DATA\ZHOU-14\YZN005807.D  
 Sample Name: XG-3-24A

=====  
 Acq. Operator : Z  
 Acq. Instrument : Instrument 1 Location : Vial 1  
 Injection Date : 8/13/2014 9:08:06 PM  
 Acq. Method : C:\CHEM32\1\METHODS\DEF.LC.M  
 Last changed : 8/13/2014 6:58:49 PM by Z  
 (modified after loading)  
 Analysis Method : C:\CHEM32\1\METHODS\DEF.LC.M  
 Last changed : 10/26/2014 4:03:25 PM by Z  
 (modified after loading)  
 Sample Info : IA, H/i-PrOH = 80/20, 1.0 mL/min, 30 oC, 230 nm

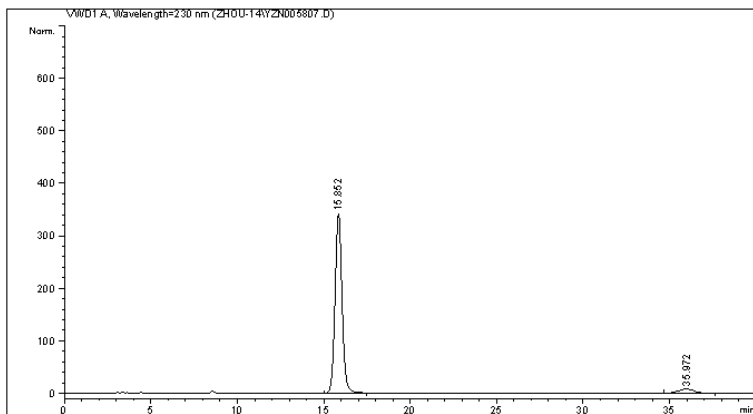

=====  
 Area Percent Report  
 =====

Sorted By : Signal  
 Multiplier: : 1.0000  
 Dilution: : 1.0000  
 Use Multiplier & Dilution Factor with ISTDs

Signal 1: VWD1 A, Wavelength=230 nm

| Peak # | RetTime [min] | Type | Width [min] | Area [mAU*s] | Height [mAU] | Area %  |
|--------|---------------|------|-------------|--------------|--------------|---------|
| 1      | 15.852        | BB   | 0.4319      | 9639.58789   | 342.35397    | 94.8889 |
| 2      | 35.972        | BB   | 0.9844      | 519.23175    | 8.04576      | 5.1111  |

Totals : 1.01588e4 350.39973

=====  
 \*\*\* End of Report \*\*\*

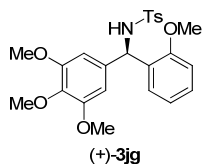

Data File C:\CHEM32\1\DATA\ZHOU-14\YZN005806.D  
 Sample Name: XG-3-24A(+/-)

=====  
 Acq. Operator : Z  
 Acq. Instrument : Instrument 1 Location : Vial 1  
 Injection Date : 8/13/2014 4:08:16 PM  
 Acq. Method : C:\CHEM32\1\METHODS\DEF.LC.M  
 Last changed : 8/13/2014 3:38:55 PM by Z  
 (modified after loading)  
 Analysis Method : C:\CHEM32\1\METHODS\DEF.LC.M  
 Last changed : 10/26/2014 4:02:28 PM by Z  
 (modified after loading)  
 Sample Info : IA, H/i-PrOH = 80/20, 1.0 mL/min, 30 oC, 230 nm

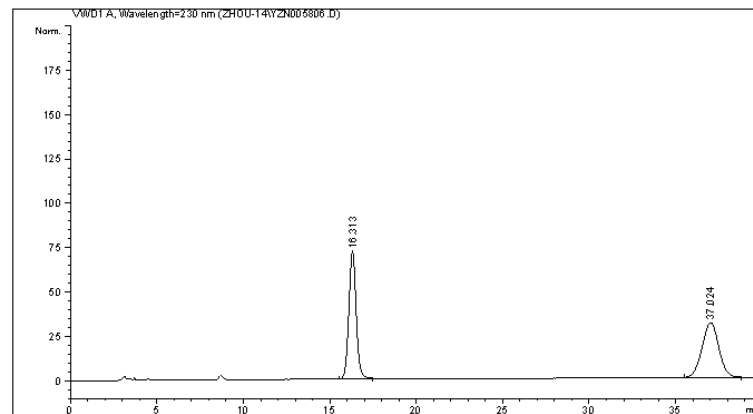

=====  
 Area Percent Report  
 =====

Sorted By : Signal  
 Multiplier: : 1.0000  
 Dilution: : 1.0000  
 Use Multiplier & Dilution Factor with ISTDs

Signal 1: VWD1 A, Wavelength=230 nm

| Peak # | RetTime [min] | Type | Width [min] | Area [mAU*s] | Height [mAU] | Area %  |
|--------|---------------|------|-------------|--------------|--------------|---------|
| 1      | 16.313        | BB   | 0.4501      | 2110.30298   | 71.91239     | 50.1974 |
| 2      | 37.024        | BB   | 1.0391      | 2093.70776   | 31.02753     | 49.8026 |

Totals : 4204.01074 102.93992

=====  
 \*\*\* End of Report \*\*\*

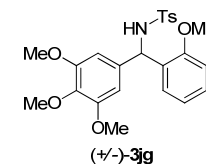

Supplement: c5ob02330k1.pdf [file c5ob02330k1.pdf]
